# Supplementary material for: Magnetic Fluctuations Entrain the Circadian Rhythm of Locomotor Activity in Zebrafish: Can Cryptochrome Be Involved?
Source: Biology (Basel). 2022 Apr 13;11(4):591. doi: 10.3390/biology11040591 (PMC9025847; doi:10.3390/biology11040591)
Supplement: Supplementary file 1 [file biology-11-00591-s001.zip]

Archive with 18 entries (18 files):
- 1_stage-group1(16-8_magnet24).xlsx
- 1_stage-group1(16-8_magnet24_smoothed_for_periodogram).xlsx
- 1_stage-group2(16-8_magnet36).xlsx
- 1_stage-group2(16-8_magnet36_smoothed_for_periodogram).xlsx
- 1_stage-group3(24-12_magnet24).xlsx
- 1_stage-group3(24-12_magnet24_smoothed_for_periodogram).xlsx
- 1_stage-group4(24-12_magnet36).xlsx
- 1_stage-group4(24-12_magnet36_smoothed_for_periodogram).xlsx
- 2_stage-group1(magnet26,8).xlsx
- 2_stage-group1(magnet26,8_smoothed_for_periodogram).xlsx
- 2_stage-group2(magnet24).xlsx
- 2_stage-group2(magnet24_smoothed_for_periodogram).xlsx
- 2_stage-group3(magnet24).xlsx
- 2_stage-group3(magnet24_smoothed_for_periodogram).xlsx
- 2_stage-group4(magnet33,76).xlsx
- 2_stage-group4(magnet33,76_smoothed_for_periodogram).xlsx
- File S1.pdf
- Video S1.mp4
