# Supplementary material for: Magnetic Fluctuations Entrain the Circadian Rhythm of Locomotor Activity in Zebrafish: Can Cryptochrome Be Involved?
Source: Biology (Basel). 2022 Apr 13;11(4):591. doi: 10.3390/biology11040591 (PMC9025847; doi:10.3390/biology11040591)
Supplement: Supplementary file 1 [file biology-11-00591-s001.zip › 1_stage-group1(16-8_magnet24_smoothed_for_periodogram).xlsx]

## Sheet: Sw_speed
Time	Fish#1	Fish#2	Fish#3	Fish#4	Fish#5	Fish#6	Fish#7	Fish#8	Fish#9	Fish#10	Fish#11	Fish#12
2	2.25773	0.232755	0.706533	0.327974	1.02514	0.12702	0.416458	0.617158	0.283823	0.320826	2.60893	0.619519
2.5	1.56015	0.329285	0.818888	0	0.889933	0.163862	0.333555	0.656327	0.293359	0.312768	2.18089	0.630573
3	1.11913	0.430608	1.01001	0.00465491	0.693233	0.124346	0.227571	0.484662	0.187633	0.447848	1.70884	0.549627
3.5	0.703565	0.424116	1.1545	0.115383	0.633132	0.118144	0.217663	0.260174	0.177024	0.538021	1.30976	0.463042
4	0.533251	0.54762	1.30312	0.219213	0.557376	0.0979865	0.254347	0.419941	0.241211	0.539206	0.89749	0.552236
4.5	0.297942	0.508334	1.62698	0.392009	0.542678	0.0715298	0.0903205	0.422343	0.353028	0.642134	0.659007	0.639784
5	0.781751	0.988314	2.37408	1.07796	0.485996	0.294359	0.283936	0.792166	0.791252	0.924092	0.981672	0.882828
5.5	1.34242	1.57044	3.24398	1.6664	0.480018	0.704179	0.71035	1.12075	0.969637	1.02521	1.48831	0.966409
6	2.08466	2.08377	3.93593	2.34819	0.631931	1.05805	1.25671	1.62672	1.32474	1.03896	1.89877	1.13346
6.5	2.69681	2.51323	4.69702	3.05104	0.852003	1.92782	1.52191	2.15486	1.93269	1.05857	2.16906	1.24448
7	3.33994	3.21139	5.23092	3.69932	0.979699	2.37124	1.85212	2.26207	2.31554	1.18167	2.35824	1.43561
7.5	3.72136	3.64926	5.50617	4.1981	1.14117	2.8777	2.16265	2.42967	2.68825	1.38097	2.69422	1.67648
8	4.17674	4.13151	5.95079	4.69709	1.23515	3.40129	2.3395	3.03019	2.92238	1.58146	2.97819	1.72739
8.5	4.10486	4.21142	5.74578	4.69959	1.33041	3.49128	2.10103	2.89071	3.03115	1.45367	2.77487	1.55431
9	3.80928	4.10548	5.20753	4.55125	1.3619	3.66368	1.92718	2.96647	3.15136	1.55825	2.56126	1.50062
9.5	3.59878	3.99017	4.34108	4.29886	1.40736	4.0693	1.73313	3.10147	3.26462	1.54952	2.42673	1.67966
10	3.27389	3.85231	3.87895	3.97473	1.37444	3.78738	1.6881	2.76453	3.04615	1.41255	2.44632	1.94918
10.5	2.9181	3.43878	3.49412	3.67481	1.46519	3.58943	1.68921	3.04374	3.15584	1.25391	2.45209	2.00309
11	2.70071	3.09523	3.2806	3.33761	1.52297	3.53857	1.6649	2.86011	3.20256	1.07996	2.51622	1.98243
11.5	2.32923	2.75288	2.75347	3.33743	1.55855	3.45519	1.78318	2.61111	3.34553	0.966994	2.4309	1.91449
12	2.03814	2.28488	2.30243	3.06814	1.56986	3.33098	1.75258	2.61864	3.50928	0.993391	2.33216	2.20746
12.5	2.25813	1.96585	2.14579	3.18121	1.67869	3.0699	1.59125	2.37882	3.58863	0.98985	2.20857	2.12857
13	1.95627	1.789	2.66226	3.09201	1.69068	2.65097	1.38988	1.69641	3.61746	1.2104	2.04178	1.83227
13.5	1.83883	1.63155	2.55992	3.00225	1.76665	2.56512	1.3037	1.94442	3.66091	1.3231	1.9167	1.60885
14	1.87942	1.65286	2.57713	2.94051	1.71202	2.7502	1.3173	2.08806	3.56224	1.46654	1.83992	1.60484
14.5	1.88291	1.61788	2.55809	2.99139	1.83081	2.68662	1.24448	2.03704	3.55576	1.59463	1.76581	1.52297
15	2.13088	1.69597	2.71403	2.51835	1.76184	2.47134	1.02735	1.75523	3.51477	1.56241	1.64856	1.56207
15.5	2.17144	1.84366	2.88802	2.58602	1.75642	2.58346	1.33795	1.57445	3.36535	1.57637	1.64846	1.33048
16	2.09926	2.15331	3.06808	2.50724	1.62359	2.64965	1.40877	1.75199	3.55759	1.80849	1.69358	1.44071
16.5	2.04119	1.87672	2.78942	2.51512	1.64205	2.55543	1.45278	2.07486	3.62536	1.8681	1.77473	1.94464
17	2.08917	1.88752	2.73591	2.71991	1.59487	2.40955	1.60996	1.88299	3.88997	1.98815	1.72911	1.9819
17.5	2.23025	1.79523	2.74372	2.56509	1.61068	2.31633	1.60266	1.51878	3.96381	2.13218	1.7431	1.90286
18	2.09182	1.77104	2.77994	2.89006	1.50869	2.21287	1.58315	1.58301	4.02517	2.2204	1.67596	1.81716
18.5	1.87168	1.84381	2.63258	2.97868	1.63287	2.27003	1.76014	1.73894	4.19326	2.37546	1.73539	1.81256
19	1.88514	1.7935	2.76166	3.06734	1.5245	2.42429	1.67985	1.77927	4.26454	2.55343	1.78417	1.83054
19.5	1.62552	1.54086	2.77606	2.99188	1.60835	2.44472	1.62395	1.62387	4.26697	2.43979	1.67642	1.75206
20	1.6748	1.72194	3.17086	3.49093	1.6803	2.78875	1.67945	1.5027	4.3922	2.40333	1.66985	1.31433
20.5	1.66279	1.76722	3.48175	3.60742	1.76165	2.92066	1.67471	1.72027	4.29718	2.46164	1.64038	1.41164
21	1.63085	1.86648	3.66069	3.90613	1.74523	2.92552	1.74168	1.80665	3.9137	2.5555	1.56769	1.35666
21.5	1.81166	2.11083	3.71953	3.54259	1.70937	2.78964	1.6358	1.64696	3.46152	2.48188	1.7403	1.24408
22	2.02859	2.117	3.48883	3.62954	1.66819	2.59298	1.5322	1.47008	2.91181	2.29924	1.64415	1.19938
22.5	2.37273	2.15852	3.1641	3.4247	1.81639	2.11116	1.44017	1.30438	2.39001	2.05866	1.49271	1.0893
23	2.76946	2.33678	2.76663	3.37242	1.76979	1.76765	1.26053	1.07971	1.93851	1.84155	1.34698	0.959577
23.5	3.14431	2.5651	2.22305	3.0205	1.67815	1.24603	1.09915	0.919873	1.21134	1.76419	1.19081	0.807335
24	3.37657	2.76813	1.79108	2.86104	1.38468	0.855118	0.925895	0.492158	0.697128	1.51335	1.11709	0.474256
0.5	3.2289	2.84993	1.32635	2.59063	1.24286	0.571772	0.661548	0.489507	0.6459	1.13114	0.984094	0.343751
1	2.96481	2.4668	0.941279	2.80864	1.01049	0.481071	0.558279	0.475192	0.546333	1.01927	0.63574	0.309549
1.5	2.81901	2.13478	0.923453	2.86298	0.775349	0.409874	0.480404	0.434698	0.591209	0.943349	0.479886	0.199649
2	2.65673	1.82899	0.862349	2.99053	0.515002	0.393101	0.541604	0.408174	0.517191	0.862513	0.373163	0.130943
2.5	2.3496	1.47217	0.831657	2.65949	0.301486	0.401509	0.549484	0.401825	0.475305	0.802718	0.365358	0.203876
3	1.88075	1.0479	0.897696	2.27193	0.275571	0.400334	0.681864	0.372743	0.574069	0.63984	0.305613	0.280654
3.5	1.47757	0.587784	0.916633	1.84868	0.459232	0.441842	0.647309	0.460829	0.564555	0.659199	0.222857	0.33113
4	1.26563	0.320021	1.34974	1.65282	0.58886	0.552012	0.544525	0.405071	0.512728	0.663124	0.239954	0.349531
4.5	1.22622	0.269238	1.79803	1.22194	0.710705	0.555687	0.678713	0.479875	0.497485	0.676627	0.21985	0.345847
5	1.59078	0.751596	2.78329	1.71118	0.912403	0.762165	1.02	0.557578	0.930029	1.00554	0.53379	0.834476
5.5	1.57148	1.03803	3.79033	1.90474	1.21146	1.22113	1.15445	0.73411	1.59957	1.31129	0.772331	1.04136
6	1.73416	1.42519	4.87062	2.59528	1.45581	1.80085	1.45753	1.21295	2.14383	1.64552	0.945495	1.1263
6.5	2.12323	1.92245	5.77451	3.14619	1.46316	2.2913	1.50441	1.48084	2.66881	2.11597	1.09647	1.23104
7	2.52826	2.22446	6.27608	3.72497	1.47154	2.87532	1.72144	1.98529	3.34045	2.33679	1.32537	1.35914
7.5	2.83507	2.47457	6.52476	4.12578	1.47638	3.25156	2.02729	2.25646	4.2663	2.68549	1.48211	1.53222
8	3.01659	2.81583	6.61619	4.43336	1.71127	3.38705	2.13185	2.65946	5.08819	2.941	1.6365	1.72364
8.5	2.49814	2.6449	6.04228	3.96679	1.70318	3.60457	1.98376	2.92088	5.21176	2.80536	1.46241	1.39217
9	2.64682	2.66735	5.46616	3.86668	1.67287	3.63241	1.87189	3.30605	5.2201	2.69713	1.47065	1.32539
9.5	2.48961	2.5935	4.7095	3.56729	1.62761	3.35354	1.67389	3.17578	5.45632	2.54578	1.53569	1.37168
10	2.21857	2.52472	4.05131	3.43119	1.60827	3.22904	1.63328	3.29604	5.65734	2.32826	1.58436	1.31134
10.5	2.04811	2.74131	3.70129	3.43907	1.64465	2.99446	1.54759	3.0684	5.48507	2.42926	1.59786	1.22235
11	1.88143	2.57122	3.29559	3.21972	1.56012	2.78053	1.39087	2.64158	4.95829	2.11303	1.66668	1.13283
11.5	1.81224	2.51851	3.27224	3.16973	1.32184	3.02269	1.14979	2.4379	4.60729	2.06741	1.77868	0.941453
12	1.96969	2.639	3.15617	3.07195	1.21139	2.88292	1.03053	2.34223	4.34569	2.04224	1.82533	0.744256
12.5	1.68135	2.64669	3.26589	2.84447	1.21043	2.74736	0.997193	1.97605	4.27456	2.06375	1.93266	0.809729
13	1.67219	2.42698	3.16886	2.80722	1.09627	2.74144	1.1365	1.89397	3.64123	2.03291	2.01088	0.969248
13.5	1.71081	2.19966	3.21457	2.67946	1.14007	2.39234	1.04347	1.67308	3.17355	2.06481	2.02216	1.21963
14	1.64494	2.11624	3.14446	2.42909	1.04437	2.50627	1.10578	1.54003	3.14048	1.83187	1.98331	1.20121
14.5	1.61457	2.13105	3.13543	2.50067	1.10038	2.42204	1.03267	1.78659	3.24441	1.84839	1.88659	1.20393
15	1.62263	2.18887	3.0763	2.57762	1.02526	2.22925	1.1226	1.73037	3.10626	1.73876	1.81564	1.26793
15.5	1.54745	1.94437	2.9753	2.86125	1.20372	1.94013	0.999389	1.78599	3.12302	1.68527	1.83123	1.47932
16	1.58743	1.72652	2.67765	2.77367	1.16193	1.86234	0.978083	1.83363	3.1297	1.50477	1.68769	1.46798
16.5	1.634	1.78707	2.71131	2.62678	1.36127	1.83268	0.80226	1.82598	3.33006	1.413	1.58836	1.5267
17	1.64465	1.7033	2.56788	2.60714	1.28565	2.03333	0.914762	1.74834	3.51779	1.30194	1.54725	1.19138
17.5	1.68559	1.43645	2.56147	2.64514	1.21506	1.94514	0.879048	1.75192	3.89837	1.34958	1.5723	1.20339
18	1.8634	1.52296	2.60487	2.58039	1.11283	2.05991	0.930985	1.80721	4.31833	1.46595	1.6233	1.39595
18.5	1.78451	1.67751	2.64263	2.63942	1.23305	2.07028	0.945052	1.91993	4.48685	1.52218	1.58122	1.34946
19	1.81789	1.61103	2.64992	2.23337	1.05126	2.26739	0.951283	1.75027	4.95911	1.46887	1.58893	1.32767
19.5	1.76911	1.59846	2.68528	2.33775	0.949732	2.16497	0.895183	1.98629	5.1204	1.46107	1.62722	1.14212
20	1.70615	1.65618	2.6235	2.3282	0.898537	2.18502	1.00286	1.8052	5.36182	1.77778	1.67566	0.927353
20.5	1.63733	1.73534	2.60982	2.32207	0.936357	2.10358	1.04268	1.85547	5.41271	1.79072	1.72066	0.882316
21	2.03134	1.907	2.81034	2.49392	1.19888	1.91771	1.09578	1.9369	4.62954	1.72597	1.54108	0.866948
21.5	2.17647	1.98765	3.20199	2.52851	1.27827	1.69143	1.01734	1.94183	3.87814	1.70647	1.40561	0.639891
22	2.35723	1.84706	3.02806	2.43092	1.26508	1.57036	0.994851	1.89461	3.59363	1.64398	1.32845	0.647809
22.5	2.18848	1.70609	3.0181	2.52896	1.43582	1.45912	1.14806	2.0312	2.86879	1.59096	1.11197	0.520011
23	2.02016	1.68089	2.67347	2.26704	1.31705	1.318	1.11748	1.90648	2.22226	1.57594	0.926352	0.529126
23.5	1.86289	1.53187	2.4723	2.14006	1.25809	1.03022	1.04233	2.14315	1.65539	1.238	0.64174	0.324936
24	1.82351	1.35482	2.33122	1.8623	1.28834	0.834125	0.914237	2.15471	1.26173	1.02977	0.383607	0.413894
0.5	1.22176	1.0339	1.93552	1.3434	1.03392	0.627179	0.765736	1.88998	1.2653	0.884883	0.36325	0.402939
1	0.791279	0.754411	1.23106	1.03381	1.01936	0.634131	0.812736	1.83766	1.16096	0.699334	0.274116	0.361131
1.5	0.577835	0.480499	0.919637	0.712505	1.03763	0.552467	0.744399	1.60946	1.01451	0.492596	0.277979	0.39911
2	0.559197	0.598393	0.680816	0.455633	0.814049	0.509864	0.552165	1.3758	1.00851	0.414698	0.319532	0.396596
2.5	0.840496	0.613397	0.839121	0.402942	0.993242	0.543475	0.576734	1.07298	0.961848	0.36732	0.268896	0.378194
3	0.805344	0.607599	0.878293	0.424457	0.873126	0.590412	0.49712	0.807577	0.992027	0.303934	0.336621	0.36414
3.5	0.74644	0.700685	1.09954	0.526861	0.678488	0.680752	0.47538	0.685246	0.949901	0.334551	0.383114	0.338923
4	0.883844	0.873414	1.44315	0.569822	0.617605	0.703718	0.377431	0.682576	1.01231	0.420804	0.405248	0.320391
4.5	0.910572	1.27341	1.9723	0.871837	0.471952	0.691084	0.282514	0.415177	1.01922	0.421939	0.510495	0.417669
5	1.32573	1.4686	2.80625	1.58751	0.534135	0.881223	0.816529	0.913175	1.73344	0.710185	0.691809	0.448169
5.5	1.60243	1.78012	3.90322	1.982	0.568136	1.05295	1.03451	1.37666	2.24355	0.961794	0.888678	0.581251
6	1.81531	2.14717	4.97169	2.33549	0.549924	1.01882	1.00829	1.37622	2.65521	1.09471	1.11728	0.72728
6.5	2.10454	2.58274	5.58134	2.69042	0.619885	0.94398	1.16974	1.79655	3.04962	1.31673	1.29119	0.8472
7	2.14301	3.0755	5.82019	2.94546	0.821551	0.934127	1.18676	2.35392	3.43919	1.59905	1.48538	1.04249
7.5	2.21901	3.34471	6.38755	3.76324	0.942203	0.906022	1.31779	2.62016	3.61132	1.97046	1.72419	1.09892
8	2.42458	3.35684	6.39866	3.77782	1.01185	0.950346	1.50073	3.05775	3.87125	2.35559	1.89984	1.14384
8.5	2.12922	3.41697	6.03728	3.3516	1.078	0.851955	1.11667	2.75871	3.44715	2.4758	1.86218	1.23526
9	2.09492	3.26551	5.40701	3.22739	1.06978	0.752449	0.928928	2.57155	3.17725	2.49749	1.8755	1.47872
9.5	1.78337	3.17997	4.54265	3.08769	1.02483	0.757268	0.859004	2.65345	3.15988	2.73542	1.84895	1.53524
10	1.9684	3.01173	4.3629	3.128	1.01824	0.790402	0.736896	2.41399	3.03161	2.80449	1.83829	1.47784
10.5	2.14701	2.8127	4.13413	3.10649	0.91109	0.755411	0.708345	2.21869	2.97463	2.84694	1.84991	1.2713
11	2.17246	2.67581	3.46882	2.57686	0.886848	0.742239	0.693503	2.24872	2.93306	2.45233	1.773	1.30999
11.5	2.13379	2.46381	3.19202	2.71833	0.815197	0.765595	0.664672	2.1482	2.92137	2.25723	1.75083	1.31855
12	2.11106	2.3732	2.97129	2.87981	0.535741	0.722689	0.705508	2.19038	2.85944	2.02617	1.71981	1.37472
12.5	2.0812	2.3162	2.76772	2.89134	0.503668	0.698789	0.752303	2.07079	2.88266	1.97822	1.7348	1.05324
13	2.09613	2.17429	2.64687	2.93333	0.470799	0.796056	0.795937	2.05346	2.84085	1.73433	1.78976	0.895027
13.5	1.96549	2.06809	2.31921	2.76924	0.389284	0.827013	0.887706	1.95941	2.95626	1.58145	1.84378	0.982426
14	1.90411	1.86323	2.18403	2.73465	0.299303	0.945546	0.939608	1.78848	2.89462	1.52252	1.94515	1.14233
14.5	2.08485	1.79338	2.22199	2.66269	0.362494	1.04085	0.941344	1.56548	2.92304	1.66299	1.96614	1.14254
15	2.0534	1.59371	2.12668	2.58914	0.599923	0.976785	0.826508	1.27798	2.99474	1.66715	1.97253	1.10949
15.5	2.34547	1.52674	2.08948	2.45685	0.725155	1.03321	0.688606	1.1334	2.9948	1.78729	2.03342	1.00435
16	2.56343	1.80236	2.01899	2.42482	0.786166	0.94904	0.698507	1.07588	3.05539	1.85764	2.05877	0.960681
16.5	2.38497	1.68641	1.97913	2.58112	0.835696	0.836884	0.809415	1.11661	2.99041	1.87736	2.0896	1.12533
17	2.3287	1.95014	2.14366	2.6063	0.921519	1.03829	0.817635	1.20056	2.90754	1.93424	2.06979	1.10687
17.5	2.35916	1.96266	2.12662	2.78722	1.04945	1.11052	0.826089	1.16456	2.90068	1.88181	2.01497	1.2988
18	2.12763	1.95529	2.02422	2.79657	1.05574	1.15592	0.837411	1.20408	2.92803	1.88466	2.0429	1.27511
18.5	2.11268	1.9599	2.1044	2.77536	0.992768	1.40722	0.952863	1.49636	2.94316	1.88202	2.0448	1.16063
19	1.75777	1.97264	2.41414	2.83225	1.14483	1.33941	1.04784	1.54428	3.1615	1.94759	2.15121	1.09548
19.5	1.36336	1.63144	3.02467	2.86164	1.18931	1.39674	1.15917	1.53146	3.28072	1.89101	2.10717	1.12925
20	1.76175	1.72242	3.42558	2.78193	1.21032	1.48452	1.0867	1.53319	3.55475	1.94657	2.10945	0.959611
20.5	1.65412	1.72198	3.88371	2.88582	1.31612	1.44809	1.05612	1.729	3.57262	2.07615	2.14796	0.841523
21	2.05003	1.97822	4.13271	2.96043	1.50446	1.656	1.14348	1.83478	3.37069	1.91917	2.03203	0.534085
21.5	2.28593	1.94262	3.95822	3.09672	1.61226	1.69619	1.22195	1.98945	3.15145	1.76217	1.91535	0.476556
22	2.2653	1.89315	3.70522	3.1439	1.60789	1.5308	1.11377	1.86461	2.85085	1.62063	1.71609	0.51135
22.5	2.16354	1.73005	3.1792	2.98121	1.60472	1.54262	0.991121	1.68899	2.41684	1.41442	1.45378	0.469822
23	2.12544	1.66398	2.34029	2.75441	1.66829	1.52119	0.863762	1.61257	1.90047	1.22634	1.31247	0.438077
23.5	1.76299	1.67317	1.78775	2.47208	1.57656	1.48614	0.892011	1.50936	1.36682	1.05973	1.12365	0.441829
24	1.61446	1.26121	0.962184	2.1346	1.51489	1.36445	0.807602	1.13834	1.04733	0.710479	0.906204	0.463712
0.5	1.0379	0.841222	0.609413	1.81761	1.32916	0.984008	0.680959	1.07609	0.968194	0.777187	0.79347	0.39235
1	0.640657	0.697564	0.62819	1.64433	1.17322	0.895461	0.496199	0.976123	0.91471	0.812155	0.748039	0.443773
1.5	0.593552	0.767603	0.669804	1.29631	1.01475	0.77201	0.481707	0.789927	0.859066	0.773634	0.768403	0.449883
2	0.628054	0.779328	0.697395	1.14048	0.796536	0.761981	0.623335	0.958854	0.838987	0.667873	0.78089	0.437519
2.5	0.64962	0.84903	0.856957	1.0821	0.709468	0.747706	0.671136	1.14829	0.893941	0.612924	0.783121	0.42662
3	0.707857	0.684526	0.875386	1.09256	0.682768	0.741896	0.687604	1.13145	0.861826	0.595603	0.728827	0.407448
3.5	0.738941	0.706942	0.975842	1.07084	0.58996	0.738324	0.76986	1.17484	0.877518	0.639034	0.880376	0.401718
4	0.732669	0.778287	1.29751	0.944108	0.603374	0.734568	0.693631	1.23294	0.904447	0.610363	0.91202	0.409048
4.5	0.73916	0.722935	1.77088	0.713118	0.501821	0.751947	0.850255	1.06453	0.922325	0.533044	0.873105	0.387385
5	1.21499	1.02799	2.63506	1.39045	0.680975	1.08468	1.17471	1.12205	1.42572	0.764728	1.0664	0.441435
5.5	1.40888	1.26987	3.22776	1.97565	1.02828	1.46088	1.24398	1.02228	1.77248	1.03365	1.2394	0.61769
6	1.98024	1.51838	4.23169	2.59311	1.19396	2.09532	1.35065	1.13993	1.9161	1.26579	1.34382	0.796833
6.5	2.22622	2.06211	4.84764	3.07017	1.37065	2.29153	1.33015	1.499	2.21483	1.51883	1.59284	0.916522
7	2.64229	2.34638	5.47132	3.60869	1.49262	2.54153	1.44135	1.90147	2.3485	1.92464	1.63077	1.00068
7.5	3.07699	2.65118	5.57563	4.05245	1.39405	2.8336	1.49748	2.06708	2.77518	2.53455	1.89593	1.36333
8	3.62842	2.93667	5.63854	4.53781	1.43624	2.84671	1.38857	2.18553	3.32934	3.09145	2.5077	2.38354
8.5	3.70591	2.91129	5.18623	4.39928	1.45096	2.75762	1.23871	2.56351	3.37051	3.20379	2.7363	2.75919
9	3.87115	2.96277	4.76516	4.44237	1.1936	2.86108	1.25694	2.7611	3.61188	3.23224	2.84877	2.70896
9.5	3.58967	2.84533	3.89464	4.42455	1.08384	2.25562	1.0927	2.60776	3.94574	3.0942	2.95369	2.67822
10	3.36246	2.47344	3.36769	4.19239	1.08944	2.36985	1.15283	2.65927	4.25182	2.92183	3.00274	2.64965
10.5	3.29547	2.3296	2.99544	4.26387	1.01921	2.28357	0.976353	2.70888	4.56775	2.62719	3.08584	3.00982
11	3.02177	2.09362	2.73926	4.07753	1.1617	2.10184	1.03517	2.5832	4.53014	2.12604	3.11048	2.75156
11.5	2.68798	2.01823	2.42487	3.92824	1.27269	2.28226	1.10459	2.7158	4.29897	1.78154	2.69489	1.81273
12	2.32227	1.87721	2.28595	3.87578	1.20272	2.16103	1.1924	2.64496	4.08461	1.5835	2.53703	1.50661
12.5	2.09843	1.70053	2.50935	3.70235	1.25588	1.97442	1.12427	2.56117	3.85838	1.44021	2.39908	1.47567
13	2.04283	1.60565	3.15215	3.45817	1.23758	2.1031	1.19088	2.57073	3.70262	1.44801	2.37446	1.62754
13.5	2.459	1.61797	3.2515	3.52926	1.16421	2.01602	1.26036	2.43357	3.28329	1.53889	2.38215	1.58591
14	2.49286	1.50749	3.27274	3.40244	1.21637	2.13561	1.42945	2.14132	2.98312	1.57181	2.28816	1.38936
14.5	2.51956	1.86585	3.30997	3.40537	1.24406	2.28433	1.44474	2.04573	2.98943	1.5543	2.22823	1.42904
15	2.63418	1.78719	3.41772	3.31744	1.3178	2.25092	1.43883	1.81895	2.99621	1.48785	2.25955	1.47563
15.5	2.61471	1.53736	3.26914	3.12048	1.58377	2.22127	1.24466	1.65035	3.12939	1.43526	2.1362	1.38443
16	2.64523	1.58493	2.80943	2.8168	1.74604	2.16401	1.18773	1.59248	3.02409	1.45999	2.19613	1.35856
16.5	2.71312	1.61039	2.11143	2.66155	1.8741	2.3028	1.52068	1.56636	2.8739	1.56943	2.22552	1.25058
17	2.38311	1.63842	1.95609	2.42301	2.0063	2.33513	1.37102	1.52154	2.96183	1.51207	2.20089	1.38448
17.5	2.2901	1.72536	1.84324	2.28429	2.18072	2.43515	1.27641	1.46763	3.13564	1.45367	2.25733	1.27462
18	2.3465	1.76323	1.99701	2.14616	2.15555	2.52653	1.25357	1.31228	3.06985	1.38084	2.14237	1.20905
18.5	2.29923	1.99555	2.20342	2.1923	2.17115	2.55076	1.23729	1.45943	3.09445	1.38591	2.10481	1.12515
19	2.36726	2.63389	2.18552	2.17878	1.98911	2.73806	1.27935	1.43361	2.94545	1.31957	2.11839	1.25232
19.5	2.53973	2.67611	2.41877	2.48122	1.90469	2.55355	1.2619	1.53842	3.11875	1.24577	2.0069	1.2956
20	2.43717	2.67022	2.40424	2.63406	2.02189	2.52738	1.18121	1.61637	3.37068	1.04462	2.14131	1.25533
20.5	2.4981	2.6541	2.58918	2.83631	1.97676	2.70429	1.28331	1.63095	3.4745	1.04845	2.05402	1.14335
21	2.70827	2.89809	2.82356	2.76424	2.0252	2.46635	1.47697	1.83662	3.19234	1.04456	1.88907	1.14563
21.5	2.58727	2.7663	2.74613	3.10006	2.10907	2.2698	1.54239	1.94298	2.89798	1.03067	1.83817	1.10856
22	2.36964	2.4757	2.35746	3.05497	2.02765	2.15671	1.53483	1.75211	2.57627	1.04788	1.71356	1.04664
22.5	2.15772	1.85649	2.32038	2.86984	1.83895	2.00396	1.47071	1.58752	2.37557	0.998145	1.58178	0.910166
23	1.86115	1.66925	2.16002	2.42386	1.59988	2.03903	1.46222	1.39117	2.01286	0.949526	1.51233	0.859795
23.5	1.73615	1.49502	2.00326	2.12505	1.30795	1.84654	1.18457	1.17347	1.65607	0.929197	1.14191	0.711323
24	1.53312	1.38912	1.74305	1.84095	1.10569	1.42961	1.19252	0.982525	1.3627	0.755439	0.984928	0.695107
0.5	1.0207	1.04077	1.34285	1.61337	0.740277	1.28317	1.02817	0.673302	1.31492	0.591799	0.904261	0.600924
1	0.910864	0.673531	1.03526	1.11246	0.486145	1.2196	0.887048	0.5608	1.31408	0.458239	0.813118	0.59274
1.5	0.863472	0.643518	0.826391	0.889809	0.402892	1.12419	0.915407	0.631801	1.30587	0.306592	0.755451	0.597209
2	0.814797	0.67828	0.711105	0.824172	0.392065	1.08507	0.907583	0.629436	1.27504	0.263678	0.700673	0.60715
2.5	0.816639	0.650449	0.719214	0.822943	0.379754	1.02567	0.914997	0.628537	1.30426	0.135682	0.705126	0.605886
3	0.759518	0.667349	0.725851	0.861865	0.347264	1.02647	1.00375	0.647547	1.27449	0.154763	0.771929	0.610357
3.5	0.799771	0.60797	0.803167	0.900832	0.373063	1.04546	0.9742	0.682105	1.30598	0.159224	0.801913	0.595689
4	0.851256	0.586493	0.882658	1.09035	0.375874	1.09097	0.884852	0.709068	1.39518	0.219995	0.81311	0.726185
4.5	1.02255	0.639587	1.54018	1.15977	0.413183	1.15427	0.885372	0.735853	1.39888	0.393181	0.85165	0.762203
5	1.28232	1.19943	2.62794	1.71239	0.697324	1.63028	0.960316	0.865065	1.9491	0.803761	1.1398	1.21179
5.5	1.50682	1.53507	3.56546	2.25169	0.920713	2.00396	1.24087	1.12916	2.23964	1.06246	1.51852	1.36227
6	1.93527	1.95323	4.57656	2.66238	1.15729	2.27266	1.41354	1.47901	2.36147	1.36165	1.67298	1.5045
6.5	2.26368	2.39425	5.25119	3.00266	1.37396	2.612	1.55802	1.68204	2.57156	1.74168	1.80684	1.69041
7	2.80348	2.77861	5.79584	3.34558	1.52357	2.87447	1.60448	1.97116	2.69496	2.16449	2.00839	1.73741
7.5	3.60488	3.13564	6.33068	3.43334	1.75483	3.17046	1.73614	2.29585	2.84879	2.41312	2.25907	1.71385
8	3.89054	3.60406	6.09015	3.72388	1.7495	3.3189	1.80992	2.54806	3.15397	2.51151	2.47405	1.85711
