# Supplementary material for: Magnetic Fluctuations Entrain the Circadian Rhythm of Locomotor Activity in Zebrafish: Can Cryptochrome Be Involved?
Source: Biology (Basel). 2022 Apr 13;11(4):591. doi: 10.3390/biology11040591 (PMC9025847; doi:10.3390/biology11040591)
Supplement: Supplementary file 1 [file biology-11-00591-s001.zip › 1_stage-group2(16-8_magnet36_smoothed_for_periodogram).xlsx]

## Sheet: Sw_speed
Time	Fish#1	Fish#2	Fish#3	Fish#4	Fish#5	Fish#6	Fish#7	Fish#8	Fish#9	Fish#10	Fish#11	Fish#12
2	0.429772	1.27134	1.31931	0.220809	0.572745	0.79846	0.702711	0.926029	0.63861	0.964057	1.02104	0.468773
2.5	0.419153	1.23784	1.08754	0.189526	0.620745	0.627258	0.857782	0.870264	0.625855	0.967194	0.827069	0.517662
3	0.415359	1.19343	0.904436	0.146971	0.555704	0.416053	0.964176	0.88798	0.631808	0.90232	0.623341	0.549584
3.5	0.457303	0.976192	0.905131	0.07765	0.544044	0.360059	1.29341	0.942832	0.71388	0.786229	0.609009	0.684799
4	0.789018	0.95522	1.00659	0.148505	0.632054	0.403208	1.40942	0.931958	0.862123	0.812563	0.69933	0.754063
4.5	1.01853	0.872241	1.08881	0.174413	0.569099	0.424682	1.45799	0.637697	0.839729	0.732539	0.769716	0.793834
5	1.47692	1.51681	1.65926	0.524956	1.11853	0.751001	2.09069	1.09171	1.28623	1.29817	1.23477	1.27816
5.5	1.82362	2.04994	2.20493	0.808878	1.65047	1.17432	2.56943	1.28073	1.54876	1.8373	1.72488	1.64787
6	2.38114	2.65778	2.84873	1.47955	2.2361	1.67648	2.66429	1.68515	2.01488	2.42172	2.29494	2.04428
6.5	2.8729	3.23203	3.51916	1.80102	2.43223	2.23703	2.7365	2.24511	2.51882	2.82396	2.91668	2.24396
7	3.72361	3.93364	4.00994	2.30947	2.73871	2.72458	3.01609	2.70528	3.17993	3.3183	3.38895	2.63302
7.5	3.96874	4.61445	4.53758	2.56888	2.88561	3.1807	3.63754	3.26468	3.5925	3.73637	3.86093	3.08327
8	4.48221	5.12049	5.00608	2.66069	3.53562	3.52424	3.64074	3.95624	4.21265	4.31662	4.27111	3.14009
8.5	4.63939	5.0011	4.92931	2.81384	3.18352	3.41217	2.9486	3.67013	4.17466	4.09524	4.18247	2.85099
9	5.15288	4.90402	4.47036	2.67727	2.8228	3.10086	2.59114	3.72866	4.43492	3.84321	3.77874	2.62908
9.5	5.00262	4.51142	4.14227	2.49693	2.2878	2.81673	2.27491	3.58647	4.29691	3.37318	3.4507	2.37026
10	4.85332	4.31733	3.65749	2.47164	2.08349	2.4198	2.15083	3.30241	4.10365	3.16902	3.00337	2.29275
10.5	4.32292	4.12557	3.3976	2.28618	2.01786	2.26881	1.48045	2.91656	3.61816	3.03781	2.79549	1.86483
11	4.03038	3.94158	3.01798	2.24989	2.41327	2.03195	0.933225	2.63779	3.32365	3.14207	2.47657	1.57709
11.5	3.54633	3.9385	2.55161	2.35618	1.75547	1.77595	0.858267	2.51975	2.99178	2.77845	2.11521	1.60486
12	3.17094	3.89871	1.99407	2.09825	1.64422	1.49658	0.819313	2.48737	2.77697	2.6886	1.67163	1.4912
12.5	2.61552	3.9167	2.06345	2.17118	1.61625	1.5386	0.743592	2.24854	2.40551	2.68848	1.76101	1.47635
13	2.58864	3.97167	2.01111	2.02146	1.59441	1.84918	0.772142	2.37373	2.46115	2.71146	1.899	1.40647
13.5	2.61091	3.92114	1.96923	1.9581	1.69017	1.94864	0.790874	2.14943	2.38784	2.74491	1.93506	1.37336
14	2.75568	3.87974	1.94184	1.97924	1.59771	1.69565	0.862162	2.23083	2.50998	2.6861	1.80206	1.43171
14.5	2.80379	3.76684	1.99242	1.97017	1.61906	1.56972	0.748747	2.21775	2.49814	2.64039	1.77888	1.35235
15	2.7777	3.60174	1.99477	2.07092	2.17616	1.82138	0.741704	1.76514	2.24774	2.86278	1.90572	1.36237
15.5	2.67866	3.48203	2.26714	2.14298	1.98289	1.78485	0.677709	1.76644	2.20969	2.71858	2.04019	1.35411
16	2.65513	3.63967	2.4018	2.41258	1.9692	1.71352	1.06027	1.66983	2.15322	2.79447	2.0568	1.67146
16.5	2.54818	3.75223	2.43531	2.18574	1.90483	1.54793	0.906424	1.57658	2.04368	2.83858	2.01601	1.49376
17	2.39041	3.67785	2.68328	2.29337	2.07172	1.53263	0.899267	1.74497	2.03062	2.85907	2.12637	1.55296
17.5	2.20325	3.63093	3.09558	2.18877	2.13121	1.651	0.819998	1.78916	1.93925	2.85255	2.38646	1.44889
18	2.21269	3.64902	2.83235	2.18725	1.93864	1.78944	0.726015	1.79591	1.97347	2.75793	2.30253	1.42606
18.5	2.55523	3.76731	2.99143	2.08207	1.78703	1.67056	0.710169	1.84944	2.17441	2.73293	2.32417	1.37216
19	2.99027	3.86961	2.99512	2.09436	1.84525	1.87	0.713059	1.7682	2.33286	2.82483	2.43382	1.39296
19.5	3.33316	3.89078	2.88045	1.81002	1.9117	1.66936	0.199922	2.05762	2.64532	2.85426	2.27002	1.00919
20	3.78464	3.83174	2.69638	1.94434	2.08409	1.57003	0.442342	2.03268	2.8576	2.89102	2.10504	1.19801
20.5	3.81759	3.91774	2.49636	1.94665	1.75764	1.57311	0.309418	1.89827	2.80888	2.79831	2.02	1.13948
21	3.987	3.72074	2.32867	2.11251	1.70592	1.78359	0.63031	1.93054	2.91476	2.69275	2.03114	1.38286
21.5	3.94981	3.43021	2.74688	2.17505	1.45964	1.83282	0.871557	1.71153	2.79176	2.42477	2.29131	1.52394
22	3.45818	3.04973	2.85531	2.09356	1.18517	1.93862	1.23004	1.50852	2.46388	2.10573	2.41764	1.6724
22.5	2.9684	2.53862	2.8668	1.80045	1.37653	2.13705	1.59579	1.40096	2.15724	1.94447	2.52243	1.66851
23	2.35604	1.98439	2.79666	1.54171	1.19623	2.54969	2.0582	0.994532	1.6478	1.60255	2.69724	1.76109
23.5	1.70705	1.58629	2.7669	1.31803	0.973059	2.61183	1.93859	0.777401	1.22166	1.29196	2.723	1.60307
24	1.49185	1.22388	2.59041	1.04627	1.00983	2.57401	2.02065	0.687056	1.05013	1.12634	2.58736	1.50537
0.5	1.05484	1.03499	2.08955	0.650497	0.878897	2.3888	1.781	0.362991	0.676377	0.953515	2.24124	1.18393
1	0.806481	0.962712	1.689	0.335081	0.687285	2.3661	1.60065	0.331697	0.544109	0.824536	2.02789	0.959871
1.5	0.840749	0.836235	1.43178	0.158427	0.48989	2.06604	1.26499	0.277216	0.538889	0.635538	1.75427	0.703711
2	0.706889	0.84183	1.16565	0.142302	0.306109	1.68876	0.970738	0.22143	0.470336	0.519103	1.42449	0.565116
2.5	0.610671	0.799061	1.05222	0.133748	0.246919	1.5896	0.569719	0.234152	0.454982	0.471844	1.3543	0.365556
3	0.564486	0.831504	0.979317	0.117151	0.271777	1.41952	0.522073	0.163961	0.401276	0.500543	1.2293	0.323689
3.5	0.540927	0.771484	0.937919	0.0782073	0.354177	1.25869	0.523545	0.0813849	0.352789	0.498336	1.17294	0.302878
4	0.54421	0.781432	0.999795	0.093398	0.409361	0.978227	0.545124	0.212344	0.418682	0.552787	1.06125	0.321069
4.5	0.641485	0.898526	1.16275	0.138036	0.6017	0.803833	0.74498	0.221937	0.459312	0.715499	1.02885	0.437386
5	1.24682	1.44342	1.70701	0.365709	0.977681	1.28926	1.41193	0.754652	1.02091	1.20512	1.51726	0.878615
5.5	1.95442	2.32245	1.98746	0.596129	1.06056	1.54147	1.60624	1.10019	1.54742	1.71351	1.79134	1.1208
6	2.4786	3.2636	2.49549	0.883288	1.2367	1.5747	1.82934	1.26568	1.87487	2.28181	2.0534	1.37861
6.5	2.83925	4.19914	3.12805	1.07846	1.52592	1.65132	1.8879	1.38967	2.13029	2.9059	2.406	1.4996
7	3.6328	5.11457	3.72288	1.3233	1.52236	1.8679	2.02077	1.39408	2.53511	3.38218	2.78604	1.71242
7.5	3.98096	6.06132	4.10278	1.5233	1.61172	2.09157	1.95297	1.52133	2.79112	3.87643	3.11668	1.78062
8	4.25584	6.49454	4.21245	1.703	1.70425	2.18043	1.65137	1.71175	3.02371	4.13772	3.20961	1.71287
8.5	3.78108	6.71709	3.81889	1.9795	1.68793	1.82198	1.37328	1.37179	2.63433	4.23885	2.81862	1.71816
9	3.31901	6.34272	3.78305	1.8895	1.91596	1.835	1.54479	1.20031	2.32297	4.17839	2.80438	1.74371
9.5	3.20377	6.00658	3.50896	1.81502	2.1246	1.82938	1.55427	1.2005	2.26064	4.08599	2.65795	1.71809
10	3.15134	5.68358	3.13633	1.76133	2.56551	1.75923	1.56128	1.41863	2.35233	4.13333	2.46372	1.70211
10.5	2.50123	5.20975	2.90821	1.74206	2.56142	1.58713	1.36038	1.92904	2.29046	3.88767	2.2497	1.56752
11	2.44185	4.57613	2.64626	1.75477	2.45607	1.38626	1.57576	1.93299	2.24123	3.52664	1.9989	1.68987
11.5	2.25801	4.21316	2.71913	1.79085	2.32762	1.24917	1.60831	1.80029	2.10425	3.28333	1.97002	1.73191
12	2.24916	3.70576	2.58173	1.54525	2.05655	1.20444	1.34864	1.8824	2.10536	2.89414	1.90301	1.45928
12.5	2.3	3.53275	2.40921	1.64665	1.7556	1.10419	1.20618	1.78197	2.05583	2.64334	1.79696	1.4532
13	2.24153	3.06132	2.49752	1.5988	1.39599	0.921732	0.9517	1.71364	1.96487	2.22973	1.73374	1.29027
13.5	2.21316	2.82398	2.5279	1.70362	0.680075	0.750726	0.881302	1.53808	1.82622	1.77755	1.65667	1.29793
14	2.26988	2.83622	2.37163	1.68277	0.613238	0.808373	0.944119	1.21901	1.68243	1.71895	1.59662	1.31359
14.5	2.18658	2.72548	2.31533	1.63741	0.574283	0.983483	0.735954	1.13957	1.60413	1.6318	1.68136	1.18036
15	2.21238	2.753	2.65372	1.54029	0.459462	1.01081	0.721477	1.25502	1.64668	1.58819	1.89673	1.10683
15.5	2.27692	2.85651	2.82426	1.49329	0.557477	0.962015	0.515244	1.36125	1.74269	1.68296	1.94803	0.98694
16	2.2473	2.66497	2.87064	1.38893	0.602116	0.871178	0.305587	1.49574	1.80684	1.63511	1.89782	0.81668
16.5	2.31267	2.74199	2.62816	1.45363	0.634342	0.927046	0.306265	1.88033	2.06549	1.73087	1.81853	0.826847
17	2.27149	2.68895	2.4345	1.45259	0.601799	0.93832	0.37517	1.95316	2.09472	1.66868	1.70828	0.861695
17.5	2.28261	2.49588	2.3855	1.38576	0.990548	0.950481	0.446511	1.98017	2.11774	1.78437	1.71401	0.858664
18	2.24345	2.56316	2.5199	1.54247	1.08934	0.974217	0.428893	1.80154	1.99782	1.88271	1.78485	0.915232
18.5	2.25792	2.54286	1.73726	1.62195	1.0273	1.14108	0.584789	1.66079	1.936	1.84912	1.46715	1.03184
19	2.20157	2.45158	1.80568	1.62991	1.20379	1.46687	0.725963	1.59603	1.88614	1.87112	1.66611	1.11969
19.5	2.32552	2.65918	1.65949	1.69476	1.66537	1.50255	0.700497	1.38478	1.87773	2.17169	1.6107	1.13642
20	2.25333	2.67702	1.79794	1.70728	1.71729	1.68502	0.685011	1.03304	1.65516	2.18808	1.75072	1.1443
20.5	2.47368	2.70539	2.10936	1.64653	2.01002	2.1607	0.684149	0.967824	1.74685	2.33268	2.13609	1.11632
21	2.5177	2.67547	2.39897	1.96226	1.94903	2.37339	1.10188	0.980677	1.77722	2.2886	2.39363	1.47172
21.5	2.69761	2.59164	2.38809	1.89757	2.22174	2.5765	1.33113	1.06209	1.91881	2.38587	2.47385	1.57551
22	2.56156	2.472	2.62091	1.7285	2.5488	2.64244	1.53889	1.09791	1.86193	2.45618	2.60858	1.58731
22.5	2.39003	2.4655	2.28117	1.63498	2.43148	2.48354	1.85823	0.843473	1.63796	2.39646	2.37331	1.71338
23	2.08843	2.37833	2.35335	1.45153	1.96294	2.47442	2.1678	0.90721	1.46416	2.10604	2.39741	1.78045
23.5	1.92062	2.40213	2.23064	1.22828	1.91792	2.30406	2.53656	0.755935	1.29047	2.09724	2.28742	1.86607
24	1.5061	2.25676	1.88709	1.05679	1.66037	1.83976	2.73775	0.596667	0.989359	1.93096	1.88158	1.88093
0.5	1.28823	2.23882	1.39353	0.608676	1.30489	1.51054	2.46924	0.369751	0.766615	1.74953	1.44413	1.56024
1	0.982172	2.27248	1.17777	0.36385	0.987757	1.11229	2.39577	0.31661	0.591352	1.60685	1.12978	1.39256
1.5	0.894984	2.3051	1.04822	0.296122	0.721398	0.893493	2.28968	0.245865	0.55055	1.51123	0.97029	1.31514
2	0.883411	2.24581	1.13965	0.295634	0.565798	0.637368	1.9467	0.200358	0.522868	1.43555	0.852964	1.13639
2.5	0.846443	2.02313	1.14276	0.243305	0.566806	0.582102	1.71123	0.147885	0.524981	1.3471	0.831272	0.957848
3	0.812195	1.886	1.12331	0.274651	0.5612	0.527945	1.39613	0.151093	0.519913	1.27066	0.775086	0.807399
3.5	0.836575	1.66205	1.22656	0.260435	0.539987	0.487904	1.1269	0.175018	0.544018	1.12308	0.795878	0.666799
4	0.868507	1.53366	1.40433	0.279059	0.540491	0.439411	1.04652	0.183462	0.563553	1.02611	0.862111	0.596078
4.5	0.951083	1.44829	1.56779	0.323055	0.510739	0.452654	0.999902	0.280502	0.648927	0.960972	0.960702	0.594767
5	1.51079	1.78975	2.08513	0.470561	0.632483	0.560032	1.23993	0.899446	1.20389	1.19733	1.26505	0.798493
5.5	2.63962	2.53455	2.73885	0.511256	0.776942	0.741638	1.14394	1.20045	1.94212	1.63486	1.68145	0.764702
6	3.14055	3.22095	3.45264	0.722219	0.728152	0.856519	1.15198	1.35758	2.24781	1.95476	2.09689	0.885843
6.5	3.40096	3.91954	4.00393	0.906335	1.38587	0.914713	1.14464	1.395	2.40604	2.62672	2.40139	0.98057
7	3.89023	4.87164	4.47522	1.15396	1.75136	0.989671	1.16133	1.52352	2.72773	3.27953	2.67255	1.13426
7.5	4.18107	5.47341	4.78982	1.28698	2.17341	1.17405	1.22521	1.6421	2.93132	3.80314	2.9344	1.248
8	4.43485	6.05222	4.95125	1.50804	2.16381	1.20092	1.21041	1.64314	3.0388	4.09073	3.04002	1.35113
8.5	4.33597	6.08463	4.70683	1.52809	2.3903	1.14427	0.913779	1.1993	2.77185	4.22805	2.89947	1.20095
9	3.54468	5.6006	4.14825	1.74583	2.21697	0.985713	1.08687	1.21178	2.37668	3.89973	2.55367	1.38739
9.5	3.28449	5.33965	3.6036	1.65577	2.50607	1.17883	1.10721	1.26053	2.27432	3.91829	2.3792	1.36829
10	3.25491	4.9738	3.22778	1.84596	2.17068	1.45127	1.18055	1.46183	2.35275	3.53679	2.21507	1.48062
10.5	2.96077	4.49987	2.82684	1.88442	2.2449	1.86636	1.20653	1.63511	2.27943	3.33805	2.24779	1.4884
11	2.82936	4.28289	2.603	2.04969	1.82038	1.8165	1.06995	1.75754	2.32868	3.18963	2.17654	1.50939
11.5	2.66339	3.99825	2.54778	2.14808	1.84016	1.85671	1.12146	2.04607	2.4098	3.05725	2.15439	1.60616
12	2.41936	3.82541	2.52717	2.12217	1.52802	1.88941	0.918825	2.09705	2.33636	2.81183	2.15814	1.49703
12.5	2.22276	3.83822	2.5028	1.83092	1.47378	1.96651	0.94979	1.96611	2.18452	2.80042	2.19604	1.37586
13	2.20983	3.66775	2.46294	1.97668	1.18951	1.75728	0.843368	1.99661	2.19326	2.58189	2.07133	1.39529
13.5	2.14033	3.43633	2.19447	1.80213	0.812509	1.62709	0.793779	1.95212	2.14774	2.31636	1.96403	1.29792
14	2.14016	3.23483	2.11249	1.74099	0.370368	1.17487	0.765473	1.79817	2.04718	2.00053	1.66553	1.26634
14.5	2.11606	2.99395	1.95128	1.73451	0.378332	1.21485	0.729952	1.78817	1.95661	1.72734	1.54406	1.26044
15	2.14135	2.96981	1.72958	1.68396	0.322367	1.1743	0.612265	1.48083	1.80271	1.67378	1.41612	1.16318
15.5	2.15721	2.93602	1.64828	1.82876	0.302315	1.18595	0.691308	1.43854	1.75608	1.64207	1.36772	1.28681
16	2.23889	2.72952	1.57634	2.10483	0.460144	1.19198	0.503163	1.45774	1.81472	1.63211	1.34178	1.32843
16.5	2.20468	2.76168	1.42761	2.11573	0.429949	1.21982	0.594418	1.45735	1.78717	1.62946	1.28117	1.38056
17	2.18647	2.82334	1.37979	2.11943	0.473028	1.23	0.781053	1.39375	1.74446	1.67049	1.26655	1.47941
17.5	2.13438	2.76678	1.16213	2.24648	0.544028	1.30653	0.709111	1.43903	1.7909	1.64959	1.22345	1.4956
18	2.1204	2.94641	1.24632	2.25861	0.562657	1.30611	0.799725	1.50644	1.86288	1.74812	1.26606	1.53467
18.5	2.0724	3.10875	1.11293	2.45956	0.591032	1.30891	1.22351	1.65218	1.90229	1.84477	1.20087	1.84261
19	2.0087	3.08986	0.982405	2.4648	0.509764	1.21502	1.35763	1.6136	1.87886	1.79473	1.08889	1.90892
19.5	1.97442	3.13156	0.973144	2.34111	0.364903	1.27987	1.34457	1.70207	1.87806	1.71929	1.11424	1.85707
20	1.97333	3.08765	1.55218	2.6513	0.751099	1.20136	1.38791	1.76607	1.92135	1.90296	1.36121	2.05971
20.5	2.08389	3.16867	1.81062	2.66904	1.26849	1.12121	1.1546	1.83968	2.00935	2.19342	1.45847	1.95426
21	2.26082	3.0601	2.31464	2.78545	1.4934	1.34635	1.62423	1.99658	2.13613	2.25635	1.82289	2.25183
21.5	2.19192	2.65466	2.1934	2.61165	1.89646	1.63597	1.6933	1.83748	1.99052	2.25521	1.93297	2.20349
22	2.04664	2.04964	2.24192	2.15633	2.2259	1.88476	1.54059	1.68907	1.86588	2.13682	2.07367	1.88731
22.5	1.92117	1.71544	2.19136	1.9018	2.62814	1.95234	1.45098	1.65125	1.77035	2.1709	2.0945	1.71773
23	1.74753	1.46312	2.11351	1.73314	2.67515	1.90825	1.57911	1.41954	1.58641	2.07891	2.02922	1.66045
23.5	1.53791	1.14214	1.45063	1.15146	2.32561	1.86477	1.50379	1.16564	1.35292	1.72062	1.679	1.30608
24	1.25533	0.838849	1.24536	0.908076	1.78947	1.67525	1.59299	0.986736	1.10353	1.31342	1.47369	1.23024
0.5	0.902999	0.766743	0.877667	0.521932	1.55415	1.40184	1.16618	0.641005	0.785785	1.18322	1.16849	0.819215
1	0.817531	0.747516	0.784952	0.43842	1.19245	1.01517	0.979142	0.684561	0.767836	0.992801	0.913251	0.692212
1.5	0.803465	0.756191	0.77712	0.411782	0.853097	0.782025	0.81993	0.646483	0.739282	0.827607	0.795197	0.60649
2	0.845664	0.730321	0.694802	0.406033	0.504753	0.671045	0.804124	0.552681	0.724624	0.65616	0.706006	0.586037
2.5	0.893851	0.691925	0.645655	0.399251	0.670684	0.708223	0.810982	0.530091	0.711995	0.708589	0.696403	0.610208
3	0.933395	0.717619	0.746678	0.451374	0.654923	0.77162	0.843162	0.517828	0.725587	0.713859	0.77563	0.652361
3.5	0.962355	0.55933	0.768174	0.547531	0.687457	0.858553	0.907313	0.502139	0.754483	0.654964	0.840673	0.732516
4	0.949711	0.596264	0.822066	0.493651	0.707014	0.922661	1.00133	0.592526	0.77562	0.673833	0.887967	0.752585
4.5	0.967215	0.667459	0.978719	0.453459	0.652928	0.90895	1.08162	0.456634	0.717483	0.679317	0.956845	0.739972
5	1.3358	1.1309	1.79679	0.722006	1.11658	1.11652	1.54197	1.03732	1.1945	1.14954	1.49868	1.0994
5.5	1.80987	1.58783	2.59051	0.804661	1.06882	1.31221	1.58836	1.36438	1.58383	1.33856	1.96206	1.14483
6	2.46808	2.32501	3.50926	0.994763	1.20384	1.47104	1.59011	1.79517	2.13488	1.78615	2.48808	1.22402
6.5	3.35085	3.27833	4.2844	1.2264	1.2063	1.87831	1.67826	1.90511	2.61939	2.28419	3.06875	1.37609
7	3.93978	4.31181	4.60728	1.41202	1.40813	2.03326	1.88545	2.18611	3.05448	2.90909	3.30427	1.59869
7.5	4.53386	5.05109	5.07164	1.79399	1.75319	2.06991	1.77975	2.609	3.57529	3.46572	3.5388	1.72512
8	4.83031	5.95186	5.39692	2.06693	1.82475	2.18867	1.73444	2.9533	3.87265	3.97537	3.76053	1.86755
8.5	4.82517	5.91411	5.04777	2.11107	1.42981	2.18536	1.41833	2.63955	3.72162	3.74418	3.54375	1.72919
9	4.58151	5.95728	4.57732	2.21428	1.6989	2.23338	1.72015	2.7718	3.66586	3.90734	3.33467	1.95335
9.5	4.14252	5.38515	3.86529	2.21044	1.50426	2.07557	1.93264	2.58236	3.3516	3.5074	2.90995	2.09541
10	3.49547	4.91563	3.00413	2.00767	1.81094	1.85234	2.07754	2.78063	3.13896	3.39565	2.38078	2.06666
10.5	3.17865	4.28864	2.74645	1.98054	1.70763	1.72265	2.16955	2.75807	2.94173	3.00542	2.1715	2.06508
11	2.88564	3.83687	2.34774	1.81954	1.48153	1.71245	2.16758	2.61161	2.73342	2.65118	1.98205	1.97454
11.5	2.81259	3.206	2.10061	1.72543	1.85127	1.82491	2.19461	2.49368	2.65129	2.49943	1.89011	1.93275
12	2.72264	3.05555	1.78069	1.63471	1.95769	1.68305	2.12876	2.45514	2.57854	2.48911	1.69361	1.88049
12.5	2.63572	2.83836	1.65808	1.67142	1.886	1.49301	1.95126	2.29772	2.46378	2.36379	1.579	1.80125
13	2.76615	2.90801	1.61089	1.56687	2.04682	1.52057	1.6327	2.32384	2.54365	2.48355	1.56025	1.59264
13.5	2.85578	2.65098	1.84864	1.59421	1.92964	1.42421	1.43792	2.26887	2.56955	2.28165	1.63078	1.50853
14	2.77244	2.66992	1.944	1.52739	2.04163	1.70842	1.40708	2.46859	2.63503	2.34147	1.82717	1.46475
14.5	2.75121	2.55063	1.89648	1.56127	1.91197	1.5963	1.39251	2.27848	2.51517	2.22742	1.74627	1.48458
15	2.77338	2.83864	1.85222	1.53724	1.4983	1.49641	1.28675	2.3534	2.56742	2.17237	1.68015	1.42053
15.5	2.72838	2.6149	1.59607	1.56219	1.33065	1.42085	1.14133	2.32977	2.54652	1.98001	1.50858	1.34239
16	2.82068	2.62703	1.76637	1.49266	1.20176	1.49316	0.885162	2.26048	2.55627	1.88853	1.62319	1.18001
16.5	2.76829	2.49612	2.08871	1.55372	1.00535	1.49608	1.15287	2.23377	2.51503	1.72369	1.79442	1.29773
17	2.72529	2.60942	2.06435	1.69282	0.81397	1.48699	1.11324	2.44406	2.56479	1.70739	1.77914	1.35792
17.5	2.7779	2.49537	2.13407	1.91221	1.12092	1.35995	0.758249	2.0714	2.4078	1.83692	1.76995	1.29377
18	2.94127	2.8836	2.15551	1.94123	1.35195	1.72833	0.759046	2.15751	2.5228	2.15944	1.95252	1.31926
18.5	3.1073	2.80786	2.10461	2.03879	1.51507	1.71356	0.773156	1.93424	2.49328	2.19637	1.92033	1.36104
19	3.34021	3.12861	2.42547	1.97324	1.51159	1.73227	0.745772	1.70325	2.48074	2.35308	2.09197	1.32172
19.5	3.57255	3.39024	2.31895	2.03301	1.41715	1.86908	0.750377	1.74285	2.62278	2.44383	2.0874	1.35345
20	3.52817	3.60004	1.81802	1.93407	1.30865	1.95841	0.492964	1.75077	2.5927	2.49721	1.87138	1.18748
20.5	3.59204	3.81201	1.52693	1.9157	1.45311	2.03395	0.667675	1.48932	2.50594	2.68818	1.76184	1.27324
21	3.71725	3.91099	1.7012	1.97215	1.24282	2.23636	0.949867	1.77009	2.71795	2.61922	1.96694	1.44521
21.5	3.48235	3.59936	1.59421	1.9807	1.31745	2.11572	1.03672	1.61867	2.52475	2.46227	1.86272	1.48688
22	3.05044	3.34914	1.49055	1.7957	1.30973	2.22932	1.17353	1.65276	2.33253	2.32844	1.89618	1.50286
22.5	2.53014	3.29435	1.29337	1.61631	1.40312	2.37877	1.30392	1.7014	2.09665	2.32841	1.85727	1.47298
23	2.03538	2.96422	1.16994	1.47623	1.47565	2.25143	1.32915	1.49854	1.73594	2.19965	1.71877	1.43657
23.5	1.6836	2.62125	1.23921	1.4281	1.51382	2.07501	1.39538	1.25859	1.47973	2.0473	1.68336	1.43122
24	1.36996	2.12515	1.40652	1.23507	1.47192	1.98116	1.23655	1.06641	1.23796	1.78107	1.73872	1.22717
0.5	0.969135	1.82157	1.04783	0.81191	1.1448	1.64674	1.08071	0.739128	0.867828	1.46843	1.3641	0.922472
1	0.745405	1.56346	1.02338	0.551514	0.786762	1.42525	1.11954	0.733879	0.750149	1.18606	1.24804	0.817716
1.5	0.675522	1.27806	1.01561	0.521279	0.658067	1.36889	1.06545	0.623046	0.661419	0.968231	1.20835	0.74359
2	0.661117	1.00266	1.029	0.542596	0.625077	1.25936	1.02359	0.602958	0.635447	0.811781	1.17588	0.732831
2.5	0.619044	0.864624	0.962849	0.472475	0.611937	1.15077	1.05811	0.549948	0.591976	0.742737	1.0948	0.694012
3	0.629346	0.964834	0.991754	0.47403	0.665032	1.17127	0.991125	0.563786	0.576089	0.846602	1.13933	0.684927
3.5	0.655929	0.977769	1.02055	0.475238	0.65906	1.07347	0.999119	0.683922	0.640078	0.859889	1.0778	0.707664
4	0.788718	0.93989	1.06281	0.469582	0.706707	1.00044	0.933937	0.666206	0.703599	0.862161	1.08143	0.693766
4.5	0.945847	1.07682	1.31444	0.449736	0.870857	1.10733	0.976503	0.56931	0.728565	0.994944	1.28017	0.70754
5	1.53143	1.61623	2.57337	0.666877	0.953665	1.1	1.11654	0.877748	1.17922	1.31808	1.92069	0.874691
5.5	2.11294	2.27409	3.44528	0.963083	1.03187	1.33054	1.2597	1.08737	1.55985	1.70142	2.45204	1.10409
6	2.32919	3.15531	4.62217	1.12705	1.30991	1.53926	1.31139	1.29168	1.76443	2.26058	3.13649	1.21192
6.5	2.60181	3.93769	5.17442	1.42714	1.4112	1.72818	1.71455	1.52665	2.04001	2.6753	3.4843	1.57744
7	3.13475	4.80568	5.57246	1.64558	2.38701	1.93069	2.31627	1.69845	2.3994	3.56193	3.78271	1.9878
7.5	3.45353	5.43896	6.18764	1.82349	2.79539	2.29618	2.34402	1.98028	2.69966	4.08283	4.25223	2.08284
8	3.44297	5.84065	6.40673	2.02389	3.2897	2.49293	2.30362	2.21099	2.82563	4.52445	4.44192	2.16044
