# Supplementary material for: Magnetic Fluctuations Entrain the Circadian Rhythm of Locomotor Activity in Zebrafish: Can Cryptochrome Be Involved?
Source: Biology (Basel). 2022 Apr 13;11(4):591. doi: 10.3390/biology11040591 (PMC9025847; doi:10.3390/biology11040591)
Supplement: Supplementary file 1 [file biology-11-00591-s001.zip › 1_stage-group3(24-12_magnet24_smoothed_for_periodogram).xlsx]

## Sheet: Sw_speed
Time	Fish#1	Fish#2	Fish#3	Fish#4	Fish#5	Fish#6	Fish#7	Fish#8	Fish#9	Fish#10	Fish#11	Fish#12
2	2.60224	1.46393	1.30742	2.32582	0.730273	1.1856	0.846615	1.31062	1.91268	1.89449	1.01439	0.960234
2.5	2.14642	1.36821	1.31253	1.85086	0.646243	1.15912	0.961052	1.29898	1.6943	1.60831	0.964989	1.0091
3	1.69684	1.19403	1.33249	1.59862	0.594147	0.884519	1.06396	1.28284	1.42781	1.39382	0.930563	0.920531
3.5	1.43815	1.07251	1.26262	1.2998	0.615663	0.626582	1.13454	1.16024	1.24937	1.15681	0.882395	0.827548
4	1.41918	1.1112	1.23849	1.49979	0.788598	0.643403	1.25771	1.01664	1.15584	1.28751	0.956104	0.883755
4.5	1.39466	1.17323	1.21443	1.38639	1.10621	0.613382	1.3864	0.958913	1.1097	1.26075	1.13616	0.941891
5	1.33295	1.12999	1.06117	1.63498	1.13837	0.667796	1.41546	1.04674	1.12252	1.33604	1.06211	0.980784
5.5	1.542	1.27117	0.957528	2.06847	1.39045	0.749017	1.54508	1.13052	1.2616	1.61988	1.12216	1.1044
6	1.60667	1.43549	0.997182	2.52393	1.47475	0.79361	1.59723	1.18265	1.31159	1.92521	1.16687	1.15687
6.5	2.20925	1.68946	0.980383	3.06742	1.9082	0.899923	1.59041	1.27997	1.67671	2.33047	1.39201	1.20741
7	2.32485	1.93653	1.08332	3.71463	2.50263	1.00297	1.6445	1.49039	1.8428	2.78179	1.75754	1.28373
7.5	2.4279	2.20512	1.21852	3.77762	3.01725	1.31264	1.64631	1.68873	2.01837	2.9557	2.07272	1.44705
8	2.39611	2.37545	1.29337	4.05857	3.35051	1.62827	1.64895	1.77686	2.06101	3.19458	2.2847	1.60756
8.5	2.64216	2.57441	1.40318	4.07881	3.67041	1.8575	1.83429	1.93418	2.24997	3.33046	2.53195	1.8333
9	2.86872	3.24986	2.09378	4.19707	4.42658	2.39893	1.97942	2.4549	2.6252	3.71015	3.26514	2.16556
9.5	3.38226	3.62566	2.72406	4.242	4.96139	2.8808	2.09236	2.83916	3.05253	3.92358	3.83178	2.4716
10	3.46348	3.92276	3.1131	4.08004	5.49837	2.71573	2.19482	3.20805	3.28546	3.9971	4.29118	2.42671
10.5	3.53797	3.791	3.16135	3.82475	5.2785	3.05901	2.26174	3.68454	3.54331	3.8268	4.19767	2.63893
11	3.74119	3.95888	3.25078	4.02366	4.81557	2.99244	2.49865	4.59637	4.08491	3.97825	4.03607	2.71004
11.5	3.73204	4.01128	3.35993	4.10231	4.44194	3.13625	2.35479	4.30904	3.93986	4.01907	3.90312	2.71361
12	3.60013	4.1298	3.53191	4.05321	4.83662	3.52654	2.33647	4.13683	3.79349	4.04897	4.17441	2.89152
12.5	3.34098	4.03136	2.99177	4.12964	4.07244	3.0883	2.12717	3.4469	3.34421	4.04886	3.51594	2.54869
13	2.92439	3.86228	2.33811	3.91064	3.40323	2.49401	1.84084	2.88696	2.8633	3.8489	2.89077	2.11516
13.5	2.33492	3.75305	2.05481	3.70948	2.6531	2.81328	1.74421	2.25157	2.24344	3.69574	2.36434	2.24246
14	2.18425	3.98644	1.98549	3.52976	2.42888	2.71436	1.63709	1.49625	1.80684	3.7083	2.24478	2.13308
14.5	1.93402	3.74791	1.71928	3.34809	2.32949	2.37733	1.46078	0.328883	1.11078	3.52363	2.05903	1.88163
15	2.11975	3.28423	1.62654	3.15702	2.3785	2.08657	1.60254	0.306735	1.17422	3.21395	2.04317	1.79827
15.5	2.14361	3.22784	1.69263	3.15167	1.80971	1.36022	1.64147	0.676295	1.36704	3.21166	1.79291	1.44488
16	2.38265	2.42374	1.54663	2.96624	1.86747	1.399	1.80991	0.803627	1.56683	2.71632	1.74855	1.58127
16.5	2.3581	2.36796	1.62676	3.11962	2.12065	1.42638	2.08773	0.715494	1.51583	2.7552	1.91794	1.69577
17	2.28398	2.14045	1.5644	3.152	2.11301	1.1059	2.12564	0.708942	1.49207	2.64029	1.8892	1.5612
17.5	2.56714	2.23298	1.58981	3.45457	2.14298	0.687693	1.90742	0.69453	1.63089	2.83595	1.9016	1.2215
18	2.50941	2.22374	1.70134	3.3342	2.15627	0.6906	1.70557	0.683509	1.59353	2.7551	1.95034	1.14534
18.5	2.37481	2.76546	1.65788	3.51854	2.14825	0.49379	1.74467	0.685947	1.54948	3.12329	1.89375	1.05772
19	2.29585	3.00554	1.41014	3.49766	2.06584	0.724624	1.55212	0.119827	1.23514	3.22693	1.69917	1.0889
19.5	2.03233	3.19112	1.42674	3.54331	1.919	0.664057	1.42333	-0.0133479	1.01479	3.33418	1.64151	0.991785
20	2.20652	3.12696	1.36748	3.46279	2.09917	0.621942	1.5419	-0.0111305	1.10322	3.2783	1.69763	1.03727
20.5	2.36618	3.11219	1.40705	3.6293	2.08205	0.920032	2.00724	-0.00608086	1.16775	3.36789	1.72738	1.37796
21	2.13111	2.88003	1.38725	3.86821	2.38096	1.53346	2.25382	-0.00542296	1.03685	3.36035	1.87806	1.80843
21.5	2.03801	2.43168	1.31367	3.59077	2.72329	1.64107	2.41084	-0.00985977	0.998609	3.01202	2.04269	1.93208
22	2.0382	2.17975	1.33172	3.30008	2.91995	1.76925	2.42479	-0.00192625	0.984755	2.72138	2.16691	2.02029
22.5	2.01909	1.7004	1.25745	3.54945	3.03677	1.54023	2.21503	0.0401785	1.01219	2.58791	2.19052	1.81283
23	2.15164	1.9692	1.2214	3.14121	3.09221	1.45205	2.21126	0.0420134	1.09601	2.54665	2.17548	1.78292
23.5	1.99406	1.64135	1.19712	3.25255	2.6147	1.45145	1.99204	0.508856	1.26088	2.43683	1.9081	1.69368
24	1.9834	1.63081	1.00233	3.11756	2.48097	1.28144	1.32476	0.51014	1.26361	2.3612	1.72089	1.30962
0.5	2.18961	1.50815	1.20415	2.46874	2.00127	0.682221	1.43855	0.510798	1.37305	1.99717	1.56467	1.08146
1	2.20091	1.66578	1.158	2.67212	1.62111	0.657023	1.36628	0.529534	1.39312	2.14721	1.32693	1.03464
1.5	2.17874	1.47062	1.09892	2.62532	1.28624	0.576798	1.28345	0.616292	1.44672	2.06188	1.10706	0.942635
2	2.11867	1.47714	0.980038	2.43579	1.18001	0.899544	1.51509	0.561578	1.38586	1.94632	1.02857	1.21961
2.5	2.01214	1.24161	0.981057	2.48789	1.08194	0.843661	1.60565	0.555261	1.32171	1.84595	0.994409	1.22632
3	1.7395	1.25697	0.885686	2.37223	1.01175	0.934208	1.4043	0.103551	0.946649	1.77394	0.91795	1.16158
3.5	1.75374	1.058	0.977646	2.09741	1.063	0.867956	1.66381	0.0991899	0.961874	1.53573	0.972369	1.22527
4	1.54607	0.899923	0.803119	2.14011	1.29875	1.04869	1.49934	0.103311	0.866992	1.48491	1.03271	1.23765
4.5	1.47442	1.36223	0.673126	2.21762	1.35796	1.27666	1.60731	0.0858905	0.800067	1.78182	0.97813	1.39682
5	1.41841	1.42114	0.688951	2.23747	1.3604	1.1519	1.43762	-0.0130699	0.713547	1.81831	1.02151	1.24415
5.5	1.39383	1.48225	0.93491	2.28366	1.34786	0.928046	1.53984	-0.00379595	0.691254	1.90701	1.12006	1.17592
6	1.31414	1.41562	0.995382	2.66263	1.62339	0.940734	1.50828	0.0774086	0.688122	2.06122	1.29471	1.15625
6.5	1.60422	1.60233	1.25292	2.74301	1.73641	1.02986	1.69011	0.0626912	0.852594	2.18975	1.49774	1.3085
7	2.0369	2.15508	1.14908	3.16695	1.87494	1.27399	1.72435	0.0803453	1.07999	2.67984	1.53726	1.48358
7.5	2.15914	2.74853	1.32657	3.40808	2.22358	1.2349	1.83942	0.0775401	1.1366	3.09229	1.79457	1.54074
8	2.3376	3.04961	1.43573	3.38579	2.5937	1.53295	1.95355	0.078198	1.2191	3.2324	2.05467	1.76176
8.5	2.78322	3.63221	1.55805	3.38489	3.08525	1.94394	2.27917	0.0846067	1.4398	3.50263	2.33515	2.14302
9	3.27364	4.05813	1.67104	3.44655	3.57973	2.31363	2.41615	0.402484	1.82891	3.74925	2.66489	2.40915
9.5	3.70706	4.47746	1.85066	3.33195	4.30071	2.72835	2.57175	0.509989	2.09529	3.91945	3.1165	2.69185
10	4.22215	4.65751	1.88258	3.31525	4.97121	3.00863	2.6359	0.698805	2.41145	4.04856	3.44398	2.86204
10.5	4.02818	4.60596	2.25251	3.23058	5.57393	3.25303	2.48559	0.973117	2.44192	3.96402	3.93045	2.91093
11	4.16976	4.32921	2.31785	3.21214	5.68581	3.57437	2.37548	1.44144	2.74795	3.81251	3.97788	3.00354
11.5	4.37378	3.84112	2.68402	3.6714	5.75743	3.36456	2.16401	1.71915	3.00608	3.81646	4.18681	2.78881
12	4.139	3.49373	2.78221	4.05314	5.62761	3.09518	2.12728	1.90408	2.99471	3.83205	4.18532	2.60694
12.5	3.82518	3.29918	2.78674	3.9677	5.53229	3.08991	1.84065	1.79102	2.81103	3.68186	4.10138	2.45549
13	3.59316	3.44426	2.85189	3.54136	5.12285	2.93063	1.58099	1.74824	2.68016	3.53209	3.93061	2.24873
13.5	2.92794	3.45661	2.85949	3.54655	4.54678	2.98253	1.47767	1.68514	2.30689	3.52207	3.68241	2.22452
14	2.47671	3.37179	2.80271	3.45447	4.12426	2.90541	1.48238	1.54399	2.00314	3.47434	3.44444	2.16274
14.5	2.14205	3.50726	2.56445	3.06568	3.55316	2.62417	1.4197	1.29968	1.70196	3.34043	3.06719	1.97076
15	1.95578	3.62619	2.32465	2.69567	3.10399	2.41013	1.40729	1.24362	1.60228	3.19821	2.73064	1.85826
15.5	1.64119	3.75331	2.09586	2.0749	3.02438	2.68377	1.2913	1.24168	1.44505	2.95876	2.56936	1.95894
16	1.43009	3.88442	1.89412	1.78605	2.80497	2.39555	1.25174	1.1838	1.31495	2.87289	2.35971	1.79818
16.5	1.06906	3.79387	1.66966	1.89886	2.24252	2.43466	1.23526	1.14279	1.11692	2.87145	1.93717	1.8155
17	0.939914	3.96087	1.55907	1.41052	2.1617	2.07343	1.1881	1.23911	1.10336	2.67713	1.82416	1.60077
17.5	1.2226	4.0757	1.47613	1.21139	1.89647	1.97342	1.12887	1.19175	1.24462	2.61838	1.67178	1.52013
18	1.33007	4.22019	1.39278	1.21024	1.84103	2.09873	1.14147	1.17458	1.314	2.673	1.60473	1.6015
18.5	1.21557	4.26233	1.32028	0.964579	1.89784	2.10582	1.08715	1.07668	1.16907	2.55972	1.61671	1.5739
19	1.13621	4.32937	1.26276	1.00917	1.52782	1.83225	0.966718	0.93531	1.05691	2.62015	1.40528	1.39005
19.5	1.37442	4.31194	1.16198	1.12251	1.29076	1.91136	0.922517	0.937875	1.18278	2.69475	1.25317	1.42055
20	1.41483	4.28233	1.00089	1.04631	1.24866	1.55526	0.780256	0.904837	1.19396	2.64376	1.16699	1.15633
20.5	1.42139	4.20868	0.824083	1.11025	1.47479	1.44671	0.78933	0.76483	1.12306	2.69241	1.1865	1.10021
21	1.51256	4.1675	0.87472	1.2597	1.77545	1.48182	0.855667	0.680032	1.1053	2.74757	1.3257	1.16983
21.5	1.39486	3.72397	0.962861	1.62287	2.06403	1.32084	1.00017	0.487527	0.960716	2.73809	1.52155	1.16165
22	1.39728	3.88007	1.00173	1.90857	1.94345	1.1566	1.21686	0.413911	0.933812	2.97164	1.45334	1.19246
22.5	1.57793	3.99149	1.08565	2.22755	2.06233	1.07223	1.35831	0.380828	0.992625	3.18271	1.57858	1.21913
23	1.48855	3.55628	1.23292	2.16385	2.00016	0.814628	1.4079	0.230502	0.853065	2.91445	1.61457	1.09345
23.5	1.52418	3.18233	1.35	2.58879	1.93688	0.787141	1.39464	0.345188	0.925482	2.93727	1.62112	1.08189
24	1.58107	2.77067	1.31638	2.81777	1.54664	0.9501	1.40251	0.26981	0.94869	2.78995	1.40418	1.17731
0.5	1.21187	2.34965	1.02985	2.72007	1.09242	0.877615	1.22155	0.260106	0.774127	2.52602	1.04865	1.03778
1	1.23698	2.31122	0.97966	2.46716	1.14268	0.732325	0.945603	0.256472	0.770915	2.37158	1.03407	0.829171
1.5	1.16284	1.73329	1.00694	2.36617	1.05138	0.72186	0.71174	0.223344	0.732251	2.0276	1.02083	0.724593
2	1.19358	1.21987	1.13555	2.2984	0.994752	0.742011	0.597138	0.425193	0.85136	1.73443	1.03875	0.655712
2.5	1.15163	1.09057	1.0356	2.35051	0.987914	0.749328	0.679802	0.462056	0.845481	1.69661	0.97603	0.687464
3	1.20637	0.961304	0.968617	2.23485	1.089	0.824239	0.812905	0.306495	0.783195	1.58129	1.00647	0.782666
3.5	1.12226	0.819009	1.14271	1.96002	1.22217	0.711005	0.685469	0.477782	0.83441	1.38784	1.17449	0.671189
4	1.27813	0.813353	1.12386	2.00273	1.29061	0.537888	0.839099	0.502339	0.943499	1.40919	1.1868	0.68032
4.5	1.10505	0.710853	1.03022	2.08023	0.964547	0.677122	0.85693	0.616185	0.905798	1.38931	1.00273	0.755063
5	1.42955	0.868245	0.902429	2.10009	0.987116	0.846975	1.07064	0.606099	1.07742	1.47686	0.947865	0.919808
5.5	1.2463	0.839408	0.711132	2.14627	0.977353	0.819041	1.1294	0.428122	0.901933	1.49164	0.835377	0.959087
6	1.24484	1.52164	0.829486	2.52524	1.05214	0.863469	0.942824	0.427285	0.900976	2.02726	0.933263	0.883862
6.5	1.5826	1.61833	0.781433	2.60562	1.13741	0.850028	1.04862	0.452263	1.07413	2.10542	0.95749	0.940087
7	1.8519	1.82357	0.774509	3.02956	1.08911	0.765469	1.25281	0.300714	1.11081	2.44683	0.921039	0.98523
7.5	1.62883	1.75756	0.985235	3.27069	1.0574	0.633441	1.36463	0.277626	0.951325	2.52374	1.01865	0.974937
8	1.93948	1.68976	1.08636	3.2484	1.04734	0.623089	1.40995	0.260528	1.08188	2.49538	1.04307	0.987761
8.5	1.77777	1.46326	1.14163	3.24751	1.19378	0.515671	1.15314	0.2802	0.962338	2.38697	1.11384	0.817314
9	1.99153	1.52249	1.33408	3.30916	1.14333	0.664482	1.22889	0.287677	1.07876	2.44079	1.20392	0.92246
9.5	2.0825	1.14667	1.3269	3.19456	1.1448	0.619065	1.33702	0.293498	1.13878	2.18686	1.22449	0.96305
10	1.88217	1.33166	1.42808	3.17786	1.07971	0.554609	1.47141	0.260834	1.03227	2.2583	1.27607	1.0002
10.5	2.02085	1.58302	1.55504	3.09319	1.13972	0.62069	1.54728	0.25605	1.10816	2.33379	1.35209	1.0144
11	2.40628	1.85544	1.68681	3.07475	1.28393	0.726195	1.54301	0.280366	1.28002	2.42221	1.41616	0.987302
11.5	2.46198	2.05692	1.91838	3.40149	1.29562	0.782656	1.67725	0.2116	1.27489	2.66939	1.54161	1.06306
12	2.52776	2.06581	1.94264	3.78323	1.21476	0.946968	1.79999	0.230229	1.35484	2.86409	1.53235	1.21357
12.5	2.52854	2.07616	1.82835	3.69779	1.24247	0.841855	1.74517	0.35356	1.38777	2.83087	1.48325	1.1361
13	2.47021	2.05508	1.75757	3.27145	1.30507	0.866992	1.8122	0.490398	1.4257	2.60182	1.478	1.19773
13.5	2.38667	1.78797	1.78001	3.27664	1.3109	1.23314	1.51188	0.535181	1.4135	2.50754	1.4632	1.21635
14	2.27056	1.67033	1.67379	3.18456	1.28296	1.17587	1.20458	0.539178	1.34558	2.39305	1.39949	1.11122
14.5	2.16393	1.87413	1.41754	2.79577	1.17262	1.03644	1.12041	0.545825	1.34686	2.32473	1.31636	1.07283
15	2.11532	1.99723	1.12027	2.55828	1.19142	0.961777	1.16921	0.539005	1.31966	2.26489	1.16461	1.07786
15.5	2.04338	2.16864	1.02735	1.93751	1.32556	0.805579	1.14239	0.508699	1.26069	2.02273	1.19881	0.982129
16	2.05459	2.16923	0.932165	1.64866	1.41377	1.21996	1.14093	0.481633	1.26173	1.85637	1.20582	1.19187
16.5	2.247	2.01744	1.04887	1.76147	1.45945	1.2713	1.14337	0.323331	1.27781	1.8444	1.27524	1.23545
17	2.30514	2.60813	1.02774	1.27314	1.57035	0.959533	1.31494	0.271874	1.26934	1.89079	1.31538	1.19566
17.5	2.60703	3.18436	0.940447	1.074	1.66143	1.41225	1.96622	0.252859	1.42709	2.08616	1.33069	1.73259
18	2.75896	3.70497	1.26473	1.07285	2.10953	2.00513	1.94835	0.299943	1.52168	2.3737	1.68797	1.99026
18.5	3.52955	4.23902	1.3576	0.827191	2.36032	2.18121	1.94799	0.278035	1.92912	2.5576	1.88103	2.08287
19	4.0654	4.73009	1.68404	0.871784	2.74641	2.71612	2.08877	0.472768	2.26159	2.8469	2.23192	2.43041
19.5	4.6596	5.35962	1.92873	0.985124	3.23573	2.39909	2.17229	0.425252	2.54737	3.23737	2.59754	2.30611
20	4.80065	6.01952	2.37273	0.908919	3.93414	2.91643	2.16692	0.473406	2.61024	3.52271	3.17862	2.52399
20.5	4.89669	5.8759	2.80521	0.972866	4.68452	3.39117	2.01265	0.473548	2.6466	3.46649	3.75027	2.67859
21	4.80423	5.46707	3.19357	1.12231	5.29331	3.40162	1.75305	0.708889	2.69129	3.34306	4.24307	2.57241
21.5	5.0257	4.87134	3.2223	1.48548	5.63753	3.20017	1.73779	0.853774	2.88398	3.21604	4.43536	2.50426
22	4.4563	4.54081	3.43424	1.77119	5.70842	3.18196	1.6193	1.06063	2.69027	3.18001	4.57451	2.43102
22.5	3.94272	4.25197	3.29719	2.09016	5.33321	2.91339	1.41516	1.08674	2.46256	3.19048	4.31933	2.18928
23	3.37976	3.90879	3.30126	2.20953	4.94825	3.01032	1.20809	1.20495	2.2519	3.07444	4.12661	2.12276
23.5	2.97104	3.39077	3.04312	2.43293	4.22806	2.53745	1.12116	1.31738	2.11191	2.93863	3.63717	1.85373
24	2.76481	3.1548	2.66112	2.72792	3.38927	2.14001	1.15501	1.50581	2.1296	2.95568	3.07481	1.65572
0.5	2.42582	2.9637	2.67698	2.8303	2.73649	1.7954	0.900947	1.48571	1.96198	2.897	2.74957	1.33669
1	2.03247	2.72825	2.8004	2.733	2.16868	1.51737	0.895447	1.49751	1.73088	2.72315	2.51295	1.18759
1.5	1.97362	2.40746	2.9644	2.63594	1.8939	1.35079	0.936945	1.53426	1.71226	2.4938	2.47355	1.1452
2	2.05834	2.19347	2.98201	2.6869	1.83336	1.17002	0.967918	1.51082	1.72812	2.41814	2.45478	1.05327
2.5	1.93781	1.84484	2.9339	2.54418	1.68546	1.01076	1.00818	1.52895	1.67635	2.17772	2.32779	1.00963
3	1.91263	1.7998	2.68663	2.44038	1.69544	1.01317	0.97078	1.5368	1.67386	2.09937	2.22401	0.991011
3.5	2.0423	1.68681	2.71878	2.0538	1.65315	0.999137	0.970786	1.46563	1.68465	1.8522	2.20421	1.00024
4	2.02103	1.81815	2.40046	1.93483	1.60626	0.95454	0.942943	1.47379	1.70742	1.85288	2.03621	0.970115
4.5	2.19707	2.04379	1.95443	1.86949	1.39184	0.912767	0.934354	1.46294	1.82504	1.94501	1.72991	0.96352
5	1.86338	1.94062	1.53282	1.96329	1.39463	0.885484	0.885448	1.42781	1.6689	1.95873	1.49025	0.926232
5.5	1.51925	1.8359	1.44804	1.57417	1.34349	0.92663	0.850553	1.42495	1.5236	1.70899	1.40003	0.919104
6	1.59351	2.07644	1.32898	1.59342	1.28697	0.860867	0.855865	1.47863	1.58013	1.80614	1.34353	0.883544
6.5	1.49849	2.1335	1.31017	1.67763	1.24211	0.918823	0.873313	1.43751	1.52868	1.85526	1.30776	0.948403
7	1.49231	2.42516	1.24819	2.1457	1.23361	0.835669	0.860437	1.45622	1.54476	2.24666	1.26207	0.902688
7.5	1.41135	2.40879	1.13114	2.11429	1.29486	0.901188	0.86463	1.30181	1.40717	2.224	1.23269	0.940783
8	0.98835	2.45951	1.10798	2.15904	1.5144	0.884665	0.912115	1.22229	1.16043	2.29382	1.30291	0.917431
8.5	0.99975	2.47021	1.05216	2.0581	1.43021	0.801969	0.909505	1.14021	1.10876	2.24828	1.23422	0.841277
9	1.25281	2.84494	1.23763	2.20814	1.95048	0.790705	1.12818	1.62114	1.48495	2.51564	1.61072	0.944878
9.5	1.37096	3.16808	1.47774	2.28701	2.07715	0.79402	1.37352	1.42435	1.44547	2.72436	1.77656	1.08458
10	1.60731	3.58731	1.67946	2.23605	2.20417	0.784064	1.30234	1.40611	1.55402	2.93988	1.9267	1.04895
10.5	1.61252	3.72477	1.73961	2.20472	2.43215	0.827049	1.50533	1.34661	1.54632	2.99375	2.08833	1.17399
11	1.79511	4.03005	1.75721	2.3841	3.17957	0.730869	1.6031	1.29086	1.61393	3.24792	2.45751	1.15876
11.5	1.99728	3.80956	1.88224	2.66081	3.12763	0.825846	1.75681	1.26005	1.69254	3.26316	2.49929	1.28734
12	2.20994	3.97328	2.1611	3.06118	3.2756	1.11973	1.88003	1.31002	1.79002	3.54496	2.70701	1.53523
12.5	2.2996	4.06545	1.91885	3.33655	3.0373	1.06286	1.83613	0.688612	1.52306	3.72353	2.45362	1.50263
13	2.2174	3.48015	1.78053	3.47409	3.0413	1.32124	1.74246	0.657245	1.4699	3.51191	2.40152	1.57664
13.5	2.22193	3.11705	1.57151	3.37785	3.08038	1.17289	2.22919	1.0285	1.67723	3.2829	2.33279	1.70895
14	2.17877	2.86439	1.64422	3.41375	2.97771	1.23591	2.2096	1.21465	1.71299	3.15038	2.31485	1.72325
14.5	2.42789	2.50996	1.71129	3.48419	2.25449	1.41789	2.32638	1.21872	1.83581	3.00791	2.00346	1.88425
15	2.44756	2.52287	1.62201	3.28661	2.22189	1.39726	2.25057	1.33772	1.89778	2.8763	1.94871	1.86082
15.5	2.33498	2.52437	1.42368	3.12015	2.27417	1.29931	2.24048	2.09253	2.24093	2.77994	1.90089	1.78292
16	1.9875	2.16346	1.59049	3.03364	2.06939	1.15467	2.19703	2.14377	2.10968	2.54814	1.89113	1.69232
16.5	2.13126	2.34989	1.56926	3.46076	2.03819	1.09526	2.16785	2.12487	2.15938	2.85406	1.85705	1.62495
17	2.18638	2.35225	1.83284	3.99866	2.02891	1.15334	1.68019	1.64773	1.90944	3.11173	1.97112	1.42656
17.5	2.18386	2.30578	1.6941	4.31198	1.92038	1.01616	1.64422	1.38942	1.78964	3.27467	1.83755	1.31737
18	2.06909	2.32693	1.69456	4.52819	1.9599	0.873613	1.55354	1.58034	1.81603	3.40529	1.84179	1.2088
18.5	2.30696	2.47846	1.69989	4.77674	2.02512	0.980613	1.60255	2.10636	2.19653	3.62115	1.89906	1.28062
19	2.44739	2.33216	1.68772	4.77456	1.99404	1.138	1.683	1.18108	1.81427	3.55494	1.87248	1.41138
19.5	2.61044	2.38447	1.51894	4.81486	2.06795	1.3538	1.78166	1.11494	1.84333	3.6063	1.80138	1.5706
20	2.49879	2.58696	1.32846	4.71483	2.38169	1.18038	1.84908	1.26509	1.86089	3.68549	1.86132	1.53657
20.5	2.4213	2.78452	0.952373	4.71831	2.30197	1.42911	2.02574	1.27562	1.85663	3.76525	1.64069	1.74945
21	2.12081	2.62693	0.934816	4.58089	2.33816	1.78218	2.06215	1.30943	1.71709	3.61679	1.6718	1.97257
21.5	1.98591	2.54298	0.978639	4.50522	2.16404	1.90552	1.98214	1.27336	1.6406	3.53493	1.60785	1.99146
22	1.77538	2.31109	1.11209	4.47501	2.12581	1.84539	1.98447	0.527156	1.1789	3.40749	1.63147	1.96981
22.5	1.6231	2.49713	1.15119	4.50619	2.07713	1.65386	1.74169	0.526624	1.09838	3.49842	1.61099	1.75471
23	1.70917	2.41143	1.11644	4.20436	2.03501	1.65113	1.80203	0.490583	1.11424	3.30605	1.59366	1.78894
23.5	1.62511	2.20202	1.12647	3.57493	1.79678	1.77153	1.71087	0.323229	0.998216	2.84956	1.47694	1.80774
24	1.52255	1.76562	1.19164	3.13555	1.7135	1.6878	1.77205	0.624887	1.07544	2.41847	1.46782	1.79678
0.5	1.86963	1.90818	1.15081	2.64557	1.74877	1.8737	1.73329	0.59676	1.24157	2.23669	1.4449	1.86906
1	1.86546	1.86155	1.11622	2.28089	1.81706	1.87753	1.7405	0.446269	1.14924	2.02651	1.48599	1.87258
1.5	1.84859	1.93302	1.10901	1.89502	1.79434	2.06048	1.79326	0.965933	1.39382	1.89766	1.49037	1.98547
2	1.90918	1.60482	0.984706	1.52248	1.81176	2.19219	1.75999	0.971395	1.39808	1.72487	1.45702	2.01393
2.5	1.868	1.6403	1.02528	1.61916	1.7666	2.22765	1.62933	0.971079	1.38504	1.81101	1.44368	1.93814
3	1.87392	1.64376	1.40769	1.73067	1.80713	2.44128	1.59575	1.33197	1.5614	1.86119	1.6545	2.01642
3.5	2.34651	1.7784	1.78026	1.78521	1.91233	2.38089	1.59632	1.20727	1.72714	1.97435	1.86703	2.00063
4	2.33151	1.60689	1.96388	1.93338	1.96995	2.12332	1.57594	1.58867	1.9253	1.9698	1.981	1.8632
4.5	2.24238	1.41518	1.83367	1.99873	2.05945	2.16021	1.50223	1.57871	1.89307	1.90582	1.95505	1.84539
5	2.49915	1.32429	1.60755	2.00068	2.11068	1.93874	1.30781	1.0824	1.75605	1.85598	1.86116	1.64968
5.5	2.84249	1.61382	1.91034	2.38789	2.25396	1.92609	1.56846	1.08262	1.93315	2.01935	2.07106	1.76861
6	3.05318	1.42461	1.98491	2.60773	2.6016	1.91257	1.68471	1.5692	2.26777	2.0106	2.28025	1.83559
6.5	3.14354	1.45759	1.72583	3.54423	2.69138	1.68565	1.72095	1.75841	2.40875	2.52751	2.19196	1.74802
7	2.92835	1.57975	1.51342	3.70398	2.9093	1.63833	1.82068	1.59543	2.23342	2.65852	2.20108	1.73065
7.5	3.08812	2.14795	1.31904	3.99314	3.39355	1.68679	1.82424	1.21272	2.10573	3.0797	2.34776	1.73767
8	3.28728	2.56227	1.33769	4.13646	3.80252	1.62197	1.75123	1.54254	2.37224	3.36387	2.54055	1.67761
