# Supplementary material for: Magnetic Fluctuations Entrain the Circadian Rhythm of Locomotor Activity in Zebrafish: Can Cryptochrome Be Involved?
Source: Biology (Basel). 2022 Apr 13;11(4):591. doi: 10.3390/biology11040591 (PMC9025847; doi:10.3390/biology11040591)
Supplement: Supplementary file 1 [file biology-11-00591-s001.zip › 1_stage-group4(24-12_magnet36_smoothed_for_periodogram).xlsx]

## Sheet: Sw_speed
Time	Fish#1	Fish#2	Fish#3	Fish#4	Fish#5	Fish#6	Fish#7	Fish#8	Fish#9	Fish#10	Fish#11	Fish#12
2	0.865108	1.35142	1.32159	0.438969	1.3133	0.621672	0.901991	0.770386	1.06144	1.80531	2.57241	2.40875
2.5	0.95499	1.09033	1.06278	0.450049	1.27958	0.83729	0.879346	0.949101	0.998957	1.53025	2.14075	2.05119
3	0.816445	1.02769	0.855444	0.660133	1.31151	0.862979	0.741739	0.914792	0.854528	1.2058	1.47009	1.79802
3.5	0.684815	1.06433	0.65794	0.663828	1.32855	0.898476	0.875944	0.998847	0.684749	1.06712	0.918669	1.50575
4	0.852653	1.12567	0.563621	0.69736	1.26906	0.958818	0.955297	1.07117	0.728471	1.05207	0.500085	0.929948
4.5	0.861593	1.18008	0.508733	0.683703	1.28813	1.12959	1.18188	1.14874	0.705095	1.05776	0.591006	0.634226
5	0.898419	1.36344	0.56303	0.760956	1.40128	1.28373	1.32071	1.11362	0.772937	1.09261	0.513419	0.390522
5.5	1.00638	1.63166	0.647468	0.911503	1.32001	1.6679	1.45349	0.995826	0.858139	1.13672	0.601733	0.508274
6	1.07287	1.92506	0.828141	0.951303	1.32239	1.69993	1.71643	0.87376	0.983945	1.28612	0.678917	0.59541
6.5	1.34124	2.15739	0.940922	1.09293	1.44415	1.95945	1.91761	0.995198	1.14362	1.38917	0.878553	0.624627
7	1.60787	2.44303	1.15109	1.2963	1.67121	2.36895	2.05487	1.13703	1.39719	1.5493	1.03883	0.685121
7.5	1.74454	2.73328	1.23406	1.56432	1.842	2.5351	2.07116	1.21339	1.50701	1.71372	1.31674	0.728594
8	1.90588	2.96539	1.53099	1.66735	1.90016	2.73074	1.96383	1.37393	1.73797	1.97836	1.45098	0.756534
8.5	1.91445	3.13802	1.69834	1.88069	1.86684	2.7238	2.02329	1.51496	1.82567	2.20743	1.71029	0.77292
9	2.4407	3.53726	2.75559	2.38918	2.28365	2.7992	2.40076	2.06942	2.61161	2.33791	1.98441	0.714111
9.5	2.69876	3.93337	3.59262	3.0348	2.67997	2.92104	2.6177	2.50393	3.15645	2.39684	2.05757	0.836084
10	2.76233	4.42031	4.00416	3.38498	2.72952	2.95677	2.71615	2.67593	3.40356	2.79842	2.10025	1.02175
10.5	2.76615	4.58772	3.92724	3.91388	2.74743	2.79053	3.00992	2.74148	3.35975	3.16662	2.13154	1.20853
11	2.85901	4.72206	4.24826	4.28961	2.80151	2.87478	3.21669	2.96179	3.54583	3.4359	2.35114	1.33635
11.5	3.03123	4.89192	4.48698	4.68965	2.83135	2.54508	3.30859	2.95174	3.74361	3.53339	2.55075	1.53442
12	3.64724	5.02765	4.79372	5.02802	3.01531	2.44123	3.40353	2.78161	4.20355	3.63978	2.61014	2.08997
12.5	3.64759	4.72358	4.42921	4.7917	2.56233	2.18887	3.07078	2.27274	3.99771	3.74643	2.6987	2.63672
13	3.5287	4.40356	3.96415	4.53696	2.26334	1.85009	2.81162	2.28121	3.69555	3.90525	2.84955	2.91812
13.5	3.67736	4.26181	3.627	4.42701	2.45589	1.65059	2.70459	2.10942	3.60851	3.49228	2.7185	3.2037
14	3.64551	4.51117	3.7502	4.12705	2.37744	1.31162	2.42729	2.14751	3.64544	3.20409	2.72737	3.48086
14.5	3.58873	4.38176	3.48021	3.90021	2.31527	1.31752	2.35641	2.01274	3.50426	3.24591	2.43109	3.67976
15	3.54004	4.22028	3.34946	3.78487	2.68299	1.53953	2.34769	2.14686	3.41279	3.3261	2.0982	3.77851
15.5	3.17646	3.83898	3.08734	3.73657	2.84132	1.5308	2.28237	2.41959	3.08297	3.23052	1.95892	3.40553
16	2.5061	4.27399	2.95219	3.62533	3.36893	1.37528	2.36511	2.66843	2.70028	3.34709	1.61444	3.27107
16.5	2.52724	4.44086	2.98194	3.57639	3.5703	1.44289	2.71763	2.29868	2.72927	3.2343	1.57874	3.13583
17	2.02934	4.13567	2.98208	3.17167	3.38911	1.42051	2.73383	2.24303	2.49845	3.75059	1.70358	2.99845
17.5	2.0575	3.79284	3.08551	3.06558	3.42739	1.74149	2.73982	2.1436	2.55652	3.93013	1.68012	2.83099
18	2.19258	3.68966	3.37987	2.95937	3.59137	1.51031	2.72388	2.06197	2.76729	3.68856	1.65356	2.8477
18.5	1.98865	3.72173	3.18969	2.9139	3.55718	1.2064	2.85869	1.80377	2.57304	3.5406	1.87012	2.91848
19	1.59915	3.93067	3.51373	2.77035	3.32994	1.43361	2.79971	1.94801	2.54212	3.54778	1.87115	2.97011
19.5	2.01552	3.3909	3.0942	2.89315	3.01441	1.31229	2.66814	1.92255	2.54782	3.52679	2.0549	2.74854
20	1.89049	3.09686	2.99626	2.92973	3.07157	1.25707	2.25159	1.9739	2.40939	3.53251	1.94917	2.48852
20.5	2.1915	2.94982	3.04763	3.24457	3.03232	1.19839	1.99254	2.18347	2.54309	3.086	1.84944	2.39205
21	2.21611	2.76877	3.11583	3.35564	2.91561	0.950812	1.80441	2.07518	2.60265	2.97039	1.92632	2.31752
21.5	1.69795	2.70447	2.98917	3.37585	2.57474	1.12818	1.77697	1.85816	2.26787	2.8615	1.80485	2.1748
22	1.52013	2.54199	2.85393	3.35156	2.14827	1.38861	1.50225	1.97135	2.09542	2.70485	1.59371	2.19167
22.5	1.78761	2.41933	2.73991	3.23271	1.82574	1.20168	1.36718	1.67075	2.17885	2.52641	1.40715	2.24752
23	1.67299	2.37855	2.97842	3.1406	1.78296	1.78023	1.14346	1.60011	2.23976	2.24218	1.17715	2.32155
23.5	1.53251	2.21713	2.76231	2.97174	1.24485	1.72372	1.12322	1.29892	2.10871	2.00272	1.24205	2.61179
24	1.62737	2.17438	2.76665	2.85047	1.03298	1.68656	1.43549	1.13277	2.20342	1.96173	1.23867	2.63232
0.5	1.3994	2.13692	2.61805	2.75102	0.933367	1.69071	1.59537	1.41403	1.98595	1.62199	1.09373	2.50798
1	1.5312	2.07851	2.39844	2.68916	0.981269	1.33382	1.40745	1.44715	1.95091	1.51508	1.27889	2.57178
1.5	1.52443	1.99308	2.51336	2.64215	0.820045	1.51932	1.46412	1.17162	2.02753	1.4749	1.20831	2.36318
2	1.26574	1.96454	2.52121	2.73263	0.812185	1.59259	1.5049	1.04103	1.92573	1.43435	1.37311	2.30116
2.5	1.07348	1.90561	2.34422	2.68332	0.668769	1.02702	1.75214	0.831311	1.73511	1.30877	1.47151	2.05084
3	1.13167	2.00049	2.21564	2.73705	0.665775	1.03071	1.96762	0.935355	1.66529	1.30625	1.21414	1.88987
3.5	1.41853	2.09654	2.36724	2.74733	0.671046	1.12761	1.7782	0.717524	1.85586	1.23183	1.33921	1.9742
4	1.83663	2.17852	2.50455	2.71757	0.806834	1.16633	1.54044	0.273563	2.16693	1.274	1.37324	1.98734
4.5	1.69059	2.11075	2.38146	2.66115	0.904959	1.2032	1.7015	0.26516	2.02125	1.31923	1.21938	1.80956
5	1.90196	2.24174	2.38845	3.10564	0.83597	0.894591	1.88821	0.63572	2.12484	1.38325	1.35611	1.81312
5.5	2.05218	2.26345	2.09946	3.57083	0.943217	0.981297	1.87014	0.897694	2.00664	1.4291	1.31617	1.67732
6	2.28504	2.53167	2.02912	4.01885	0.793105	1.0979	1.81034	0.982742	2.0636	1.45292	1.2252	1.78086
6.5	2.60263	2.87433	2.06283	4.74501	0.722223	1.06629	1.61104	0.998923	2.25943	1.51959	1.29349	1.70449
7	2.29786	3.06734	2.10348	5.54109	0.80658	1.1317	1.80404	1.01676	2.12006	1.55037	1.22887	1.48827
7.5	2.1575	3.38353	2.26973	6.28823	0.765762	1.14035	1.88958	1.15881	2.13386	1.68872	1.26803	1.43498
8	2.41382	4.37863	2.49777	6.88006	0.664971	1.60657	1.66335	1.28771	2.40595	1.82285	1.25695	1.83924
8.5	2.51451	4.9719	2.49599	7.09964	0.767461	1.87282	1.4912	1.07521	2.47314	2.00215	1.13347	2.20531
9	2.82029	5.02131	2.80879	6.55552	0.904561	1.91479	2.03868	0.946973	2.82714	2.45603	1.25915	2.44858
9.5	3.1834	4.85348	3.20223	6.00046	1.30807	2.09169	2.42067	1.16297	3.24765	2.80817	1.30827	2.81928
10	3.39507	4.60215	3.76545	4.93264	1.78814	2.32015	2.67314	1.3136	3.63933	2.90357	1.44769	3.21852
10.5	3.66627	4.44399	3.96018	3.82122	2.1091	2.4906	2.52448	1.62105	3.88371	3.05031	1.50877	3.64975
11	3.76178	4.06426	3.68265	2.87704	2.39262	2.51564	2.50283	1.6302	3.78644	3.16609	1.80361	4.03493
11.5	3.78972	3.16304	3.58581	2.1421	2.65866	2.36971	2.64485	1.73745	3.73113	3.25152	2.1142	4.03891
12	3.75667	2.43583	3.66037	1.21308	3.12041	2.13735	2.6507	1.66242	3.73238	3.1982	2.37553	3.67311
12.5	3.5217	2.26117	3.42543	0.899426	3.06477	2.11296	2.11621	1.47224	3.47285	2.87164	2.37915	3.54161
13	2.96505	2.08411	3.19703	0.753219	3.14967	2.03216	1.75329	1.4092	3.04598	2.75126	2.40085	3.08027
13.5	2.46691	1.84025	2.65955	0.732114	3.02567	2.08481	1.43171	1.33829	2.52368	2.63977	2.41695	2.67526
14	1.97778	1.57551	2.51667	0.785845	2.77881	1.8658	1.32744	1.11351	2.20978	2.60784	2.32258	2.21125
14.5	1.76129	1.41785	2.74154	0.725256	2.55283	1.78934	1.27567	0.976608	2.18412	2.4212	2.04509	1.87371
15	1.69976	1.31493	2.79496	0.649058	2.36573	1.57053	1.17677	0.858535	2.20123	2.17294	1.8197	1.36945
15.5	1.61443	1.25755	2.65198	0.631949	1.98638	1.53812	1.12256	1.04403	2.09827	1.96303	1.66818	1.14136
16	1.57522	1.23959	2.55949	0.678062	1.96762	1.22762	1.14297	1.03817	2.04053	1.8162	1.50614	1.03386
16.5	1.56774	1.22934	2.29984	0.634995	1.96392	1.05791	0.9053	0.776823	1.91825	1.58935	1.41255	0.964363
17	1.44432	1.27053	2.21026	0.624092	2.07978	0.832052	0.90067	0.610786	1.82897	1.54675	1.23958	0.882511
17.5	1.33652	1.28986	1.74425	0.511275	2.37298	0.698532	0.830627	0.538519	1.53411	1.52884	1.19851	0.79936
18	1.34335	1.28406	1.35384	0.482759	2.2987	0.697033	0.833721	0.705515	1.37717	1.6179	1.07458	0.719412
18.5	1.24359	1.25353	1.18581	0.412673	2.54025	0.63072	0.847044	0.592926	1.23374	1.78141	0.887849	0.823758
19	1.16957	1.25818	1.11763	0.452635	2.49779	0.53742	0.841571	0.344386	1.12933	1.75835	0.788312	0.838503
19.5	1.12011	1.27905	1.00299	0.390749	2.85946	0.504359	0.677366	0.33531	1.03941	1.89214	0.69487	0.691265
20	1.05162	1.33244	0.922092	0.38284	2.5632	0.435858	0.719135	0.307049	0.985357	1.88902	0.718573	0.627321
20.5	1.04569	1.27744	0.880495	0.386572	2.24888	0.414387	0.635212	0.301863	0.942441	2.1044	0.684104	0.535746
21	1.30225	1.55343	1.11038	0.757915	1.95358	0.786314	0.935939	0.464987	1.1813	1.98248	0.624335	0.597584
21.5	1.08002	1.74718	1.34436	1.1521	2.04717	0.991544	1.09659	0.504485	1.18679	1.79664	0.518667	0.516403
22	1.14802	2.0752	1.67637	1.55855	1.75762	1.19936	1.05327	1.00279	1.35442	1.77703	0.506481	0.384684
22.5	1.14639	2.20939	1.83971	1.93727	1.68011	1.60774	1.04408	1.19221	1.43045	1.89533	0.431364	0.359723
23	1.1133	2.35473	1.89732	2.27346	1.1628	1.65458	1.15449	1.20667	1.46423	1.90353	0.769684	0.340095
23.5	1.29865	2.50166	2.02237	2.54657	1.08436	1.89771	1.11309	1.19689	1.58954	1.92033	0.939157	0.352351
24	1.56021	2.69206	2.13257	2.87067	1.0559	2.05802	1.52703	1.2227	1.77101	1.74122	1.05036	0.632643
0.5	1.66692	2.72747	1.87978	2.88697	0.818983	1.98729	1.25445	1.09098	1.7135	1.75425	1.23449	0.843153
1	1.64822	2.73014	1.73286	2.8575	0.746566	1.91989	1.49678	1.19565	1.61886	1.82349	1.3352	1.29721
1.5	1.51188	2.65621	1.52963	2.92015	0.651561	1.70932	1.41839	0.836488	1.46012	1.7372	1.44131	1.60067
2	1.6332	2.35641	1.48692	2.84217	0.604587	1.65122	1.3468	0.639831	1.52417	1.71414	1.75403	1.76274
2.5	1.86682	2.35395	1.56666	2.88407	0.590926	1.72252	1.60748	0.627861	1.67376	1.61783	1.58027	1.89388
3	1.90871	2.27879	1.62133	3.04511	0.598792	1.64607	1.61267	0.802042	1.73666	1.43982	1.67382	2.06099
3.5	1.96731	2.38309	1.80457	3.09727	0.482345	1.61974	1.28438	0.825053	1.85716	1.43817	1.52976	2.01295
4	1.86671	2.2409	2.03335	3.09346	0.467393	1.40046	1.19952	0.944594	1.90325	1.42174	1.48913	2.06387
4.5	2.11093	2.06231	1.98692	3.03181	0.297056	1.29162	0.735323	0.853105	2.00048	1.39727	1.64016	1.87908
5	2.2999	2.66098	2.0189	2.9628	0.443768	1.30612	0.795838	0.7169	2.13351	1.2866	1.58954	1.7398
5.5	2.05961	2.99988	1.95819	2.9609	0.689259	0.91166	0.764569	0.716201	1.98743	1.11205	1.44028	1.75169
6	2.01779	3.09802	2.00863	2.98558	0.697942	0.784536	0.38371	0.791407	1.97761	1.48348	1.29933	1.9156
6.5	1.91002	3.14456	1.99379	2.93229	0.574046	0.882028	0.39018	0.704835	1.93333	1.79644	1.02625	1.92077
7	1.78808	3.07261	1.79285	2.92845	0.823311	0.728395	0.27315	0.748378	1.77656	1.85503	1.03786	1.96371
7.5	1.79675	3.05942	1.83162	2.90047	1.06723	0.68371	0.274833	0.724009	1.818	1.79064	0.814586	1.8918
8	2.14678	3.33771	1.99729	2.9308	1.40179	0.716269	0.390341	0.739793	2.06528	1.91393	0.56417	1.82646
8.5	2.01455	2.70276	2.02473	2.72495	1.31307	0.747198	0.526151	0.8309	2.01203	2.03773	0.636138	1.81646
9	2.32437	2.71409	2.20615	2.74337	1.20775	0.738154	0.697208	0.970163	2.27123	2.36353	0.468127	1.87368
9.5	2.3297	2.62937	2.17244	2.70595	1.28594	1.02377	0.807993	0.989049	2.26923	2.02154	0.455544	1.79328
10	2.52631	2.48832	2.36132	2.76928	1.50637	1.08327	0.862608	1.04556	2.44273	1.94817	0.52551	1.85092
10.5	2.58346	2.52266	2.5186	2.82599	1.61688	1.44659	0.868723	1.11288	2.54119	1.94574	0.652453	1.8134
11	2.52017	2.56946	2.54234	2.8253	1.6285	1.87466	0.856426	1.18596	2.50676	2.10012	0.753697	1.85231
11.5	2.18255	2.48326	2.54309	2.98342	1.38894	1.7249	0.712669	0.9569	2.40166	2.16306	0.975423	1.7944
12	2.37459	2.49055	2.58215	3.19288	1.4616	1.73642	0.85889	0.994866	2.51023	2.15101	0.965015	1.87486
12.5	2.33905	2.39621	2.56575	3.34885	1.44737	1.9053	0.705541	0.875209	2.46411	2.02284	1.11017	1.87843
13	2.35395	2.3816	2.64023	3.30117	1.53545	1.65878	0.921678	0.835128	2.48746	2.08162	1.31708	1.8975
13.5	2.26694	2.49619	2.52989	3.25665	1.51529	1.39956	1.22414	0.73882	2.41048	2.06137	1.18125	1.87137
14	2.40112	2.42809	2.50607	3.28716	1.20212	1.0283	1.23918	0.792372	2.49071	2.08659	1.24387	1.90397
14.5	2.42664	2.36072	2.51658	3.32808	1.1865	0.968118	1.38688	0.667093	2.52171	2.04797	1.25695	1.83809
15	2.44087	2.3522	2.44639	3.17986	1.31733	1.24535	1.40081	0.777553	2.45	1.87019	1.2155	1.94308
15.5	2.45874	2.11806	2.42868	3.35353	1.39076	1.23367	1.38992	0.738784	2.44197	1.89227	1.30297	1.96112
16	2.42946	2.30097	2.31068	3.44678	1.54388	1.06876	1.49948	0.911439	2.38747	1.92283	1.16414	1.91714
16.5	2.3343	2.39827	2.30096	3.85822	1.56304	1.03897	1.27755	0.854164	2.32459	1.81952	1.21966	1.88496
17	2.2628	2.81804	2.24482	3.93661	1.82092	1.15573	1.1771	1.11051	2.22678	1.96961	1.34481	2.01964
17.5	2.06295	3.31063	2.29225	4.24279	2.08596	1.20134	1.12876	0.973802	2.13706	2.02586	1.34814	2.00133
18	2.2192	3.71004	2.35307	4.6569	2.07365	0.847861	1.00542	0.898871	2.2579	2.39154	1.32253	1.99138
18.5	2.2469	3.92351	2.75799	4.81121	2.38722	0.775787	1.46428	1.01944	2.48343	2.75652	1.20388	2.08752
19	2.20356	4.41629	3.0445	5.02571	2.43011	0.83624	1.61202	0.9484	2.60849	2.94248	1.20123	2.23117
19.5	2.266	4.51044	3.4796	5.18176	2.55354	0.949117	1.75277	0.931278	2.86619	3.22519	1.2433	2.40778
20	2.35101	4.68936	3.9422	5.80029	3.08454	1.44737	2.01578	0.937962	3.19411	3.48651	0.985041	2.59459
20.5	2.76901	4.48964	4.30379	6.52131	3.00257	1.86523	2.11329	0.81005	3.58047	3.60949	1.18798	2.65974
21	2.94353	4.04791	4.49064	6.35612	2.88288	2.25643	2.63433	0.882429	3.76307	3.96858	1.29326	2.83063
21.5	2.68934	3.59871	4.79361	5.89574	2.86902	2.43709	3.06942	0.973259	3.78714	3.79152	1.41487	2.97449
22	2.55687	3.23195	4.82318	5.53492	2.54352	2.4825	2.83961	0.853583	3.73165	3.51258	1.81784	3.04194
22.5	2.42881	2.83672	4.41071	4.90094	2.4383	2.56585	2.57465	0.948288	3.47392	3.28727	2.09711	3.13707
23	2.24947	2.54042	3.95418	4.31539	2.26017	2.67985	2.47561	0.808288	3.12147	2.91875	2.54317	3.4568
23.5	1.92322	2.24026	3.2927	3.03409	1.67864	2.37843	2.29945	0.90835	2.59428	2.67217	2.85093	3.76086
24	1.45298	1.91172	2.80574	2.05342	1.42544	1.97017	2.15121	0.763682	2.16817	2.43838	2.77792	3.73859
0.5	1.15169	1.777	2.42486	1.61658	1.51704	1.90939	1.78132	0.690269	1.82901	2.02525	2.6872	3.55868
1	1.08607	1.77408	1.82501	1.56639	1.48429	1.95713	1.50135	0.718513	1.49297	1.75967	2.70452	3.31299
1.5	1.12938	1.75535	1.28915	1.73651	1.47009	1.87562	1.4437	0.637567	1.25293	1.74951	2.44913	3.04617
2	1.08876	1.67654	1.24725	1.63475	1.43772	1.89208	1.4089	0.546045	1.206	1.75494	2.1616	2.67104
2.5	1.11188	1.59886	1.18358	1.43152	1.42425	1.89206	1.3853	0.550564	1.20848	1.7418	1.936	2.0563
3	1.30715	1.41243	1.24867	1.33363	1.53852	1.85254	1.40522	0.548334	1.34195	1.67264	1.83319	1.48356
3.5	1.1206	1.32614	1.22467	1.14614	1.63936	1.83997	1.39654	0.609352	1.22008	1.61509	1.76408	1.22098
4	1.06999	1.22205	1.16476	0.985672	1.58634	1.58071	1.41044	0.575269	1.16396	1.54724	1.74211	1.2044
4.5	1.15013	1.35124	1.61865	0.677868	1.57436	1.37152	1.27149	0.498986	1.44988	1.51969	1.72819	1.26145
5	1.07716	1.26141	1.76952	0.308476	1.52402	1.32898	1.25122	0.522067	1.47819	1.44762	1.73375	1.16722
5.5	1.08582	1.20012	1.76704	0.234498	1.50912	1.08782	1.14235	0.548691	1.48515	1.47489	1.73141	1.05151
6	1.04375	1.1802	1.7432	0.242285	1.50155	0.963694	1.13113	0.625784	1.43359	1.38642	1.62938	1.03248
6.5	0.917921	1.12312	1.68964	0.352226	1.47326	0.888088	1.06724	0.594937	1.37443	1.38117	1.45676	0.982357
7	1.01326	1.38654	1.72115	0.260531	1.42543	0.757066	0.980429	0.564078	1.41492	1.36533	1.42622	0.90079
7.5	1.05207	1.37621	1.83121	0.222522	1.38926	0.779639	0.99665	0.63149	1.48092	1.34902	1.26664	0.689125
8	0.881537	1.21846	1.40236	0.330464	1.63013	0.8904	1.19288	0.614421	1.1578	1.49098	1.1966	0.517569
8.5	0.841113	1.19467	1.32171	0.410295	1.57323	0.776431	1.05741	0.587063	1.10367	1.47432	1.11788	0.495245
9	0.877636	1.49411	1.84845	0.81389	1.75932	0.918826	1.37429	0.829764	1.38952	1.52791	1.01919	0.53804
9.5	1.06031	1.77374	2.29595	1.12775	2.02213	1.05503	1.41406	1.05659	1.72082	1.51326	1.02776	0.540244
10	1.35574	2.05717	2.7008	1.36116	2.15909	1.06628	1.55933	1.42868	2.03756	1.74762	1.17606	0.455937
10.5	1.59324	1.88869	2.81901	1.66872	2.37413	1.12605	1.83688	1.61406	2.21612	2.01942	1.03458	0.46374
11	1.72556	1.99179	3.1059	1.92717	2.53323	1.14359	1.98308	1.73782	2.43491	2.21422	1.27854	0.535537
11.5	1.87459	1.93681	3.49894	2.07515	2.44507	1.03536	2.01788	1.92817	2.70515	2.22429	1.34921	0.545999
12	2.2565	2.15583	3.53095	2.24667	2.61381	1.27867	2.31252	2.05318	2.90059	2.33151	1.44884	0.875831
12.5	2.56202	2.0806	3.26958	2.1526	2.53855	1.20369	2.21104	2.25631	2.92397	2.28912	1.58573	1.15611
13	2.48548	1.76463	2.98116	2.09437	2.34371	1.20801	2.40757	2.34573	2.73891	2.47951	1.66926	1.48421
13.5	2.43092	1.72213	2.68432	2.15506	2.30447	1.38321	2.42515	2.28128	2.58432	2.38979	1.66161	1.72775
14	2.42876	1.88223	2.74397	2.18266	2.27808	1.66887	2.36405	2.35514	2.6288	2.14596	1.93203	1.89446
14.5	2.57058	1.94442	2.59888	2.2405	1.96535	1.59214	2.34493	2.19698	2.62782	2.10954	1.83917	2.04038
15	2.32259	2.08521	2.28152	2.27014	2.04393	1.60823	2.39951	2.00228	2.34323	2.17552	1.96162	2.20319
15.5	2.10711	2.11378	2.30874	2.19715	2.04094	1.33995	2.08519	1.99939	2.26069	2.07823	2.03763	2.2578
16	1.90535	2.1275	2.04226	2.23663	2.09939	1.37896	2.02126	1.5449	2.02542	2.17187	2.19098	2.25151
16.5	2.25091	2.33526	2.0376	2.26573	1.89677	1.62291	1.91593	1.1831	2.18994	2.20721	2.15993	2.22988
17	2.21603	2.59877	2.23908	2.24966	2.18431	1.35537	1.83283	0.912202	2.27127	2.26912	2.1667	2.32236
17.5	2.22646	2.54468	2.17879	2.3426	2.11517	1.25847	1.82702	0.659179	2.23105	2.27614	1.90087	2.28123
18	2.19128	2.39235	2.05887	2.3681	2.24263	1.21487	1.77286	0.715003	2.13437	2.55453	1.89269	2.216
18.5	2.48219	2.40873	2.44325	2.40963	2.29853	1.17841	1.75309	0.982648	2.4737	2.50765	1.9641	2.19932
19	2.66714	2.45582	2.7665	2.5728	2.29053	1.56974	2.02246	1.10715	2.73336	2.48619	1.77451	1.97143
19.5	2.67628	2.36548	3.20888	2.54325	1.98259	1.61235	1.99427	1.4545	2.96366	2.53182	1.7198	1.82441
20	2.32947	2.34449	3.48138	2.54956	2.30766	1.58164	1.88033	1.50735	2.91534	2.54388	1.66793	1.71014
20.5	2.26457	2.03675	3.30405	2.4847	1.94997	1.60206	2.17713	1.47197	2.79682	2.3407	1.65709	1.61666
21	2.23607	2.02377	3.2408	2.44892	1.9008	1.3499	2.01109	1.60662	2.74003	2.49435	1.99004	1.67636
21.5	2.14943	2.31848	3.21115	2.5286	2.07799	1.81142	1.80656	1.75321	2.68708	2.14548	2.00348	1.8443
22	2.17818	2.32633	2.86615	2.62473	1.77678	1.84857	1.74865	1.50392	2.53716	2.12875	1.95713	1.96677
22.5	2.00844	2.27413	2.4284	2.58675	1.69536	1.8283	1.59885	1.49865	2.22322	2.35448	2.14457	2.1392
23	1.77269	2.29999	2.05739	2.67045	2.01379	1.85682	1.57912	1.26607	1.91727	2.19141	1.91917	2.15414
23.5	1.84667	2.28248	2.00409	2.63648	1.76345	1.65253	1.62968	1.43123	1.94691	2.10381	2.02601	2.10277
24	1.87581	2.3021	1.88619	2.65648	1.78885	2.15703	1.11234	1.63398	1.88986	2.26246	2.0066	2.14171
0.5	1.79656	2.88231	1.83282	2.66805	1.76364	2.33747	1.05466	1.69669	1.86515	2.13635	1.89037	2.24515
1	1.75047	2.77222	1.80603	2.73659	1.56692	1.97575	1.12103	1.67272	1.84268	2.186	1.89808	2.17048
1.5	1.75785	2.69647	1.78027	2.63953	1.50874	2.01762	1.05296	1.65588	1.81785	2.42286	1.78967	2.16091
2	1.79534	2.62874	1.90145	2.64132	1.5792	1.65152	0.936142	1.4283	1.8992	2.28203	1.79465	2.07861
2.5	2.0687	2.6107	1.86699	2.52618	1.43382	1.54917	1.09616	1.55756	2.01887	2.20181	1.86081	2.1767
3	2.09717	2.66683	1.64291	2.59721	1.51885	1.51008	1.16321	1.58642	1.92674	2.20577	1.72839	2.31496
3.5	2.112	2.6727	1.74925	2.65024	1.41415	1.19831	1.47346	1.56096	1.9787	2.14221	1.73172	2.36787
4	2.17489	2.46513	1.78811	2.57509	1.40737	1.00974	1.53343	1.60309	2.00694	2.20453	1.52182	2.38588
4.5	2.06559	2.27339	1.74628	2.38732	1.43995	0.885384	1.57155	1.69723	1.91353	2.13161	1.56305	2.32896
5	2.0002	2.56298	1.72805	2.41876	1.38981	0.951863	1.78257	1.98558	1.87837	2.04688	1.60743	2.20646
5.5	1.9463	2.89307	1.64921	2.49783	1.3461	0.956357	2.34182	2.1875	1.78037	1.95395	1.60684	2.21476
6	1.90242	3.57447	1.70033	2.82739	1.19535	0.969176	2.25077	2.0224	1.77745	2.09109	1.56238	2.26878
6.5	1.84685	4.00642	1.73601	2.90588	1.019	0.754347	2.34379	1.89376	1.77406	2.24271	1.50763	2.27387
7	1.90675	4.58405	1.83572	2.79129	1.29437	0.971181	2.48366	1.76567	1.86766	2.47739	1.63668	2.25308
7.5	1.86558	4.7518	2.20727	3.46139	1.59546	1.16695	2.71782	1.61584	2.03038	2.60608	1.90816	2.23333
8	1.99297	5.33009	2.44081	3.43881	1.86767	1.41037	3.01852	1.66799	2.22643	3.05569	1.85175	2.38768
8.5	2.24381	5.62844	2.83944	3.44877	2.46794	1.83424	3.27353	1.97995	2.54652	3.30387	1.79329	2.55189
