# Supplementary material for: Magnetic Fluctuations Entrain the Circadian Rhythm of Locomotor Activity in Zebrafish: Can Cryptochrome Be Involved?
Source: Biology (Basel). 2022 Apr 13;11(4):591. doi: 10.3390/biology11040591 (PMC9025847; doi:10.3390/biology11040591)
Supplement: Supplementary file 1 [file biology-11-00591-s001.zip › 2_stage-group1(magnet26,8_smoothed_for_periodogram).xlsx]

## Sheet: Sw_speed
Time	Fish#1	Fish#2	Fish#3	Fish#4	Fish#5	Fish#6	Fish#7	Fish#8	Fish#9	Fish#10	Fish#11	Fish#12
13	2.28272	2.45565	1.72752	2.18313	1.29998	2.07883	1.0312	1.98842	1.77409	1.99094	2.39919	0.741537
13.5	2.46843	2.34717	1.6884	2.29768	1.33337	2.18017	0.995318	1.84515	1.99251	2.09576	2.58488	1.2891
14	2.48336	2.41144	1.50166	2.48792	1.45591	2.25383	1.06843	1.66881	2.09064	2.17443	2.90418	1.28923
14.5	2.18288	2.23516	1.44177	2.56739	1.43853	2.33669	1.0215	1.70667	2.22884	2.24569	3.02543	1.41024
15	2.33578	2.35554	1.40376	2.70751	1.59193	2.40504	1.00121	1.73029	2.34686	2.29701	2.82239	1.25812
15.5	2.32466	2.26358	1.4274	2.64696	1.56927	2.53052	1.14891	1.53599	2.48452	2.42948	2.80704	1.34801
16	2.06825	2.24991	1.53325	2.83737	1.66003	2.5242	1.19624	1.3612	2.72632	2.418	2.74272	1.46316
16.5	2.0247	1.87866	1.45797	2.67872	1.7127	2.48405	1.26524	1.41629	2.67556	2.36566	2.96724	1.3887
17	1.81642	1.80747	1.25747	2.7132	1.57988	2.51069	1.21193	1.50807	2.52147	2.43134	2.52584	0.921093
17.5	1.76632	1.70343	1.37957	2.67203	1.50188	2.55948	1.30363	1.53474	2.44387	2.44955	2.30591	1.04799
18	2.50396	1.77984	1.94258	2.83304	1.47737	2.65104	1.17428	1.41299	2.32422	2.55565	2.21043	0.884554
18.5	2.32472	1.68575	2.51883	2.79201	1.49478	2.70234	1.21586	1.41042	2.20579	2.60334	2.31418	0.893025
19	2.29548	2.03675	2.99344	2.94289	1.61856	2.75801	1.23861	1.44518	2.1352	2.63766	2.18805	0.892626
19.5	2.38599	2.01007	3.4669	2.91559	1.62658	2.72915	1.10049	1.40864	2.04361	2.57355	1.98237	0.779872
20	2.40612	2.10146	3.98806	2.91477	1.61669	2.79156	1.08201	1.33107	2.05877	2.65645	1.93258	0.764575
20.5	2.30807	2.07248	4.19279	2.93369	1.80705	2.67309	1.0252	1.27127	2.03878	2.49542	1.75919	0.926213
21	2.26619	2.09712	4.28387	2.95868	1.70767	2.57472	1.04814	1.32919	1.97694	2.40912	1.72893	0.773015
21.5	1.45619	2.01277	4.23308	2.76564	1.66045	2.35701	1.30374	1.41858	1.88534	2.19213	1.66293	0.761024
22	1.45307	2.03158	3.79063	2.71659	1.58737	2.37933	1.16077	1.41257	1.94135	2.18947	1.49166	0.773155
22.5	1.41477	1.69087	3.32008	2.6268	1.50477	2.24776	1.28651	1.60541	1.86983	2.0608	1.5291	0.857691
23	1.36477	1.71407	2.93103	2.59466	1.42721	2.28939	1.29426	1.61491	1.8288	2.13517	1.64191	0.9996
23.5	1.34522	1.72592	2.56798	2.68045	1.18276	2.1511	1.09007	1.62168	1.7181	1.97289	1.55709	0.938964
24	1.6744	1.73708	2.72593	2.80519	1.1396	2.11559	1.3575	1.6447	1.6951	1.97918	1.7642	0.682644
0.5	1.71591	1.83424	2.51743	2.79657	1.22172	2.10822	1.34285	1.54759	1.58345	1.99122	1.89565	0.687809
1	1.74246	2.01552	2.28328	2.94247	1.27556	2.02098	1.26921	1.44151	1.57679	1.89501	1.90857	0.816668
1.5	1.71824	2.21382	2.34639	2.88627	1.22491	1.89989	1.304	1.35264	1.47988	1.81599	1.98317	0.844158
2	1.97605	2.34347	2.63928	2.98798	1.1718	1.82472	1.15491	1.14716	1.36109	1.7783	2.05771	0.802842
2.5	1.97982	2.71339	2.71761	2.98409	1.16854	1.70037	1.24734	1.21453	1.3999	1.64136	2.04901	0.796739
3	1.86817	2.88163	2.88201	2.70949	1.34945	1.67415	1.19724	1.28194	1.43071	1.62084	2.08792	0.828138
3.5	1.62618	3.05193	3.20854	2.61566	1.35695	1.70567	0.98622	1.31691	1.49452	1.60236	2.08073	0.911643
4	1.58376	3.27461	3.73013	2.55006	1.36533	1.41532	0.734714	1.17269	1.57949	1.45192	2.02321	0.88357
4.5	1.55335	3.36094	4.37065	2.40396	1.33032	1.59292	0.633239	1.12694	1.70071	1.62064	2.15336	0.917939
5	1.54396	3.38726	4.82655	2.46213	1.32285	1.6497	0.716443	1.225	1.78244	1.6337	2.30791	0.97365
5.5	1.4082	3.46167	5.08075	2.43526	1.35413	1.67205	0.786666	1.3416	2.03717	1.64079	2.2757	0.895244
6	1.64957	3.24428	5.44262	2.43522	1.42763	2.99875	0.826722	1.35122	2.2187	1.95671	2.41298	0.905372
6.5	1.78582	3.17403	5.42637	2.70063	1.45641	3.07545	1.10368	1.45513	2.349	2.05344	2.56277	0.887159
7	2.01348	3.05817	5.16154	2.56307	1.53944	3.12049	1.31393	1.68681	2.4651	2.11981	2.81385	0.907965
7.5	2.19273	2.91185	4.76776	2.69975	1.51875	3.56668	1.4163	1.86889	2.61602	2.41059	2.89679	1.09631
8	2.24507	2.50846	3.92354	2.86575	1.49505	3.69945	1.62825	1.88703	2.65487	2.54478	2.74494	1.09664
8.5	2.28406	2.31939	3.00428	2.96942	1.60173	3.84501	1.72342	2.06781	2.66735	2.69762	2.64651	1.03423
9	2.27919	2.13777	2.48308	3.0047	1.59432	3.88095	1.77463	2.151	2.604	2.70736	2.59508	1.08871
9.5	1.89241	2.084	2.05297	3.05008	1.5053	2.72653	1.84754	2.17096	2.45198	2.56729	2.44528	0.987436
10	1.98182	2.07043	1.84622	2.99644	1.48203	2.88029	1.70433	2.13628	2.29532	2.70648	2.24675	0.915535
10.5	1.78382	2.0553	1.61839	3.06258	1.34	2.92276	1.65764	1.96292	2.1875	2.74991	2.00442	0.840065
11	1.96817	1.94111	1.59398	3.18257	1.32221	2.86968	1.686	1.99366	2.11967	2.67812	2.0509	0.631853
11.5	2.03089	2.07466	2.04194	3.0098	1.37907	2.84177	1.59827	2.22482	2.04951	2.65486	2.2229	0.518287
12	2.01384	2.06674	2.36558	2.7496	1.35866	2.83718	1.60274	2.14296	2.00843	2.68135	2.24984	0.663711
12.5	1.96436	2.03318	2.28827	2.60839	1.3639	2.6373	1.4405	2.08416	1.92089	2.48972	2.39599	0.711952
13	1.97852	1.93499	2.24098	2.47015	1.42868	2.616	1.43258	2.05878	1.94957	2.46764	2.42862	0.825783
13.5	2.05551	1.92722	2.1924	2.4324	1.42595	2.56028	1.57612	2.04778	2.1614	2.40397	2.55925	0.889394
14	2.04358	1.90503	2.24476	2.45667	1.50773	2.50796	1.59502	2.03401	2.16465	2.3757	2.62442	0.988613
14.5	1.88698	1.84827	2.08943	2.21757	1.64183	2.49784	1.74554	2.02309	2.11965	2.36006	2.64239	0.9899
15	1.82323	1.92456	1.70412	2.35806	1.66201	2.43404	1.80422	1.91273	2.09452	2.28533	2.5073	1.15567
15.5	1.70373	1.93511	1.61929	2.47546	1.69433	2.3113	1.86523	1.93699	2.14291	2.16066	2.45494	1.08638
16	1.47665	1.955	1.63934	2.53825	1.64541	2.5519	1.81032	1.74966	2.24576	2.40587	2.47189	0.917747
16.5	1.59931	1.94351	1.59017	2.64128	1.58825	2.52399	1.73999	1.71554	2.22291	2.36225	2.64652	0.906108
17	1.34018	1.61238	1.54755	2.41467	1.59454	2.44186	1.72474	1.73345	2.1096	2.29433	2.63787	1.02754
17.5	1.26224	1.56123	1.38347	2.35121	1.62684	2.40711	1.75037	1.66981	2.05096	2.2377	2.52714	1.03151
18	1.06016	1.57392	1.33207	2.42123	1.62841	2.35912	1.71101	1.64989	2.08612	2.22005	2.41593	1.14689
18.5	0.980168	1.37014	1.28095	2.34261	1.61788	2.10545	1.64119	1.65921	2.09079	1.99115	2.37551	1.01477
19	1.09087	1.08384	1.22799	2.25739	1.49191	2.07595	1.52633	1.59896	2.03618	1.93524	2.41474	1.06963
19.5	1.29468	0.998885	1.11363	2.38719	1.51341	2.06321	1.72224	1.70618	1.95964	1.93686	2.33696	1.19517
20	1.23802	1.06049	1.06581	2.28712	1.53906	2.00757	1.8479	1.733	1.98352	1.91213	2.21702	1.08831
20.5	1.38771	1.2783	1.07339	2.49654	1.5215	2.03387	1.59694	1.54542	1.98973	1.91807	2.15905	1.19558
21	1.40768	1.32313	1.08744	2.47488	1.47032	2.12719	1.40076	1.3199	2.00294	2.00666	2.2327	1.30316
21.5	1.44392	1.29789	1.24505	2.44816	1.38714	1.99282	1.30893	1.32598	1.96098	2.00894	2.10735	1.39105
22	1.28185	1.55646	1.06388	2.40802	1.36601	2.25987	1.19266	1.38435	2.00717	2.28489	2.08865	1.40196
22.5	1.59493	1.8772	1.1035	2.37559	1.48063	2.33897	1.29369	1.32944	2.0918	2.36946	2.12628	1.37496
23	1.57704	2.02719	1.33845	2.28169	1.52306	2.15472	1.32764	1.36919	2.23396	2.17584	2.15119	1.47193
23.5	1.5979	2.37189	1.33293	2.39871	1.52615	2.31523	1.2229	1.38961	2.21511	2.31117	2.07387	1.56914
24	1.54901	2.5242	1.35701	2.47102	1.59632	2.38077	1.50297	1.47493	2.3365	2.36633	2.06076	1.31785
0.5	1.83281	2.59797	1.48476	2.51638	1.59124	2.49449	1.67066	1.52894	2.3884	2.50121	2.01382	1.29637
1	2.07153	2.84612	1.42808	2.63176	1.55313	2.67303	1.74269	1.77055	2.46279	2.55575	2.03492	1.246
1.5	2.32245	2.89655	1.93328	2.66058	1.53675	2.64631	1.94455	1.75374	2.48915	2.48816	2.02316	1.27495
2	1.98841	3.12726	2.33637	2.86796	1.65063	2.59117	2.02158	2.00741	2.46647	2.41544	1.89289	1.26482
2.5	1.94433	3.37911	2.0861	2.86969	1.60351	2.77315	2.02796	1.8933	2.49966	2.60383	1.82944	1.27011
3	2.00521	3.22197	2.34684	2.7694	1.60866	2.67321	2.07761	1.89545	2.57294	2.5038	1.83994	1.39596
3.5	1.98106	3.31116	2.58931	2.78306	1.53666	2.44195	2.04133	1.96516	2.52929	2.27657	1.8405	1.42666
4	1.69341	3.08499	2.53739	2.57143	1.62255	2.25269	1.74895	2.1798	2.54608	2.0807	1.81746	1.37486
4.5	1.47393	2.86506	2.44311	2.44974	1.63954	1.88324	1.78959	1.97002	2.53947	1.73447	1.78995	1.4061
5	1.61639	3.0819	2.4236	2.40658	1.56727	1.59375	1.64942	1.95685	2.52377	1.47213	1.73122	1.42377
5.5	1.83191	2.90952	2.23075	2.27873	1.42885	1.58398	1.63222	1.87058	2.60485	1.48274	1.78087	1.48795
6	1.90348	2.72483	2.5776	2.33759	1.47987	1.69419	1.62844	2.05482	2.64179	1.58704	1.7936	1.42042
6.5	2.06986	2.59108	2.58181	2.56663	1.41114	1.66931	1.52203	2.08633	2.68148	1.57951	1.8017	1.27582
7	2.21772	2.55667	2.47713	2.53589	1.39329	1.85116	1.57789	2.18445	2.68644	1.78326	1.81329	1.34913
7.5	2.22108	2.75423	2.50543	2.81984	1.28204	1.97443	1.81353	1.99925	2.71512	1.88587	1.82868	1.36956
8	2.11822	2.84394	2.63401	2.91423	1.2989	2.32912	1.79685	1.93723	2.78784	2.20978	1.88064	1.32783
8.5	1.87836	2.58998	2.67877	2.91233	1.39425	2.71012	1.93874	1.96768	2.81468	2.5915	1.97046	1.42211
9	1.69033	2.49435	2.5556	2.90746	1.39132	2.74071	1.81967	1.83458	2.85166	2.62482	1.9331	1.41902
9.5	1.65232	2.57805	2.44391	2.94603	1.3746	2.70958	1.85119	1.68347	2.88461	2.58235	1.90054	1.39561
10	1.6702	2.52215	2.28693	2.67245	1.4261	2.7615	1.9769	1.78094	2.76926	2.64406	1.94284	1.44746
10.5	1.49766	2.4136	2.24171	2.80541	1.36265	2.85142	1.90773	1.45054	2.73575	2.7386	1.95349	1.44187
11	1.79857	2.31728	2.4312	2.71281	1.32937	2.76311	1.91105	1.68621	2.75026	2.66189	1.96781	1.3473
11.5	1.92472	2.02768	2.20679	2.73386	1.35369	2.76573	1.92373	1.74152	2.6743	2.66625	1.96443	1.35935
12	1.94678	1.6928	2.30493	2.9143	1.32897	2.57832	1.86489	1.95423	2.64595	2.48028	1.96004	1.18227
12.5	2.03875	1.50376	2.3805	2.92044	1.33684	2.34696	1.89039	2.04419	2.55556	2.22909	1.98462	1.05115
13	2.04727	1.25124	2.4454	2.87153	1.37634	2.28832	1.67025	2.1148	2.42557	2.15758	2.00638	0.979157
13.5	1.86425	1.18765	2.43012	2.8713	1.40122	2.32744	1.49753	2.06612	2.47131	2.19693	2.11208	0.840188
14	1.67733	1.1034	2.28451	2.77888	1.52292	2.24648	1.53745	2.17813	2.43727	2.0878	2.09041	0.700339
14.5	1.32404	0.932432	1.91195	2.90173	1.66329	2.33197	1.29708	2.16817	2.50888	2.03727	2.34849	0.691297
15	1.20403	1.0027	2.16552	2.76753	1.67022	2.29056	1.16167	2.21102	2.60968	1.95607	2.51612	0.751081
15.5	1.26053	1.18103	1.87456	2.75428	1.66798	2.37963	1.13556	1.98047	2.64213	2.03267	2.71753	0.895366
16	1.22528	1.31486	1.80411	2.84798	1.62073	2.44594	0.992708	1.91306	2.62625	2.10402	2.86154	0.967589
16.5	1.3246	1.32859	1.71073	2.76309	1.55488	2.35946	0.8825	1.76263	2.56416	2.05428	2.93152	1.03527
17	1.40124	1.24688	1.58047	2.72085	1.40156	2.24301	0.904191	1.64157	2.519	1.92886	2.86371	1.29284
17.5	1.64765	1.28973	1.67298	2.78041	1.36666	2.19734	0.900567	1.64595	2.56749	1.8929	2.93844	1.30149
18	1.72984	1.39563	1.76923	2.55714	1.28908	2.04018	1.20674	1.62708	2.38808	1.85506	2.71145	1.25286
18.5	1.94921	1.43378	1.73395	2.66662	1.04698	2.42409	1.43293	1.53401	2.30017	2.27799	2.64674	1.18638
19	1.9689	1.36674	1.63174	2.59367	1.09302	2.42543	1.29334	1.54297	2.16413	2.28809	2.5015	1.10059
19.5	1.9212	1.57686	1.78932	2.41493	1.20379	2.42985	1.28918	1.52547	2.09997	2.32444	2.38802	1.06641
20	1.81937	1.5587	1.60008	2.36262	1.24095	2.5908	1.3006	1.66749	2.14797	2.45717	2.3305	1.09948
20.5	1.75226	1.78244	1.5091	2.43218	1.47706	2.64122	1.57401	1.78955	2.16368	2.48827	2.36335	0.862009
21	1.72607	2.10662	1.3791	2.33847	1.4718	2.41893	1.47399	1.71534	2.0596	2.27864	2.34265	0.970299
21.5	1.725	2.34455	1.60058	2.60227	1.44805	2.51412	1.48715	1.90822	2.06467	2.41195	2.35649	1.14169
22	1.68201	2.42839	1.56657	2.4663	1.62011	2.16538	1.3682	1.95734	2.01379	2.02302	2.2546	1.11617
22.5	1.67347	2.44271	1.77489	2.30094	1.5975	2.19527	1.5143	2.14828	2.0566	2.03034	2.29638	1.08677
23	1.66548	2.5956	1.79996	2.30494	1.56859	2.42856	1.62137	2.21782	2.00102	2.22667	2.2567	1.10703
23.5	1.6092	2.73729	2.12182	2.35021	1.60322	2.28036	1.85789	2.26597	1.97608	2.08987	2.34149	1.08368
24	1.65935	2.74229	2.37404	2.65909	1.44961	2.31069	1.71449	2.18174	1.91447	2.14488	2.34921	1.07463
0.5	1.55657	2.78328	2.69386	2.62762	1.54232	2.49899	1.77493	2.54447	1.97993	2.31483	2.3572	1.08398
1	1.50832	2.87016	2.82476	2.56498	1.53768	2.49932	1.54113	2.27689	1.91724	2.30413	2.30989	1.02184
1.5	1.51757	2.94852	2.87536	2.63611	1.50971	2.76071	1.50581	2.23654	1.90571	2.56661	2.25718	0.976805
2	1.49944	2.96984	2.81802	2.7758	1.51092	2.78511	1.40245	1.92045	1.85717	2.60383	2.13099	1.05276
2.5	1.42791	2.87649	2.74697	2.87294	1.53831	2.64867	1.23696	1.86127	1.88257	2.46932	2.15151	1.04899
3	1.59777	2.77692	2.78196	2.96107	1.4334	2.75266	1.24001	1.73524	1.80146	2.56626	2.05042	0.950943
3.5	1.58917	2.67559	2.89974	2.67068	1.55175	2.72813	1.183	1.69649	1.81882	2.53383	2.04072	0.974976
4	1.63085	2.28333	2.79121	2.75097	1.47808	2.72352	1.05593	1.49938	1.82586	2.53823	2.06718	0.949097
4.5	1.63544	2.02142	2.49565	2.73425	1.5717	2.80807	1.2593	1.54762	1.90215	2.61058	2.12138	0.852336
5	1.50161	2.05882	2.67761	2.74791	1.63693	2.50149	1.45389	1.61045	1.98558	2.31556	2.15016	0.9673
5.5	1.52061	2.18423	2.69508	2.73746	1.62229	2.46894	1.57293	1.75977	2.11537	2.25939	2.26307	0.918382
6	1.54348	1.95475	2.74956	2.73381	1.5713	2.50991	1.85808	1.82223	2.26732	2.31839	2.30754	0.842881
6.5	1.42673	2.01344	2.85622	2.67295	1.65273	2.41041	1.60745	1.91535	2.4059	2.21982	2.5064	0.938102
7	1.44796	2.02701	2.95391	2.67563	1.62883	2.41581	1.77166	2.02191	2.48238	2.20719	2.52619	0.945444
7.5	1.53988	2.4012	3.11868	2.74306	1.67547	2.3774	1.85775	2.05617	2.46256	2.16053	2.47362	0.85028
8	1.60012	2.74082	3.27932	2.79327	1.63593	2.22979	1.68058	2.09848	2.7201	1.99439	2.46614	0.958448
8.5	1.63799	2.90618	3.18498	2.82803	1.67275	2.37241	1.55396	1.94675	2.78493	1.99846	2.49821	1.00045
9	1.66957	3.21325	3.14406	2.79619	1.69569	2.31974	1.46883	1.93302	2.82356	1.94486	2.43778	0.908535
9.5	1.72482	3.25144	3.0439	2.77729	1.69659	2.28073	1.19667	1.86612	2.76617	1.91789	2.43246	0.924964
10	1.69495	3.31543	2.91401	2.69825	1.64101	2.01798	1.34403	1.91495	2.95229	1.96975	2.30473	0.822133
10.5	1.7739	3.28787	2.58234	2.6631	1.75232	2.05297	1.26936	1.8669	2.9905	2.00003	2.20705	0.877836
11	1.72849	3.1307	2.52563	2.55691	1.71462	2.119	1.34766	1.73248	3.01518	2.05719	2.2345	1.0732
11.5	2.26761	2.83509	2.3607	2.40194	1.7473	2.16133	1.38333	1.69092	2.91481	2.11891	2.16866	1.00139
12	2.28641	2.69556	2.41426	2.48068	1.72993	2.11216	1.43246	1.82974	2.90577	2.23032	2.14298	0.781526
12.5	2.27691	2.45518	2.4113	2.64415	1.73321	2.2073	1.60701	1.95407	2.92693	2.3275	2.11359	0.812604
13	2.33491	2.55893	2.39592	2.63333	1.73856	2.23867	1.77085	1.93755	2.91075	2.33791	2.14412	0.774352
13.5	2.41272	2.65412	2.3224	2.66082	1.77051	2.51485	1.74976	1.78724	2.69142	2.28586	2.11234	0.81317
14	2.31734	2.86032	2.44233	2.73245	1.64463	2.40543	1.81079	1.62873	2.78334	2.20628	2.18747	0.861155
14.5	2.38024	2.9015	2.40441	2.60679	1.68852	2.54013	1.87272	1.76415	2.91225	2.33475	2.12433	0.752226
15	1.83781	3.07364	2.379	2.47533	1.64391	2.54155	1.94769	1.7855	2.85916	2.34042	2.2138	0.718904
15.5	1.8419	3.11447	2.2746	2.28904	1.76043	2.68922	1.79302	1.74442	2.75719	2.49025	2.21416	0.793082
16	1.73212	3.12562	2.45612	2.28897	1.70362	2.74713	1.59401	1.60609	2.59496	2.58702	2.23004	0.759295
16.5	1.68946	3.13952	2.47974	2.27863	1.68692	2.75699	1.61446	1.60415	2.56221	2.60392	2.1606	0.707259
17	1.65768	3.02848	2.60093	2.24088	1.69289	2.81131	1.57142	1.69118	2.50602	2.65625	2.18508	0.738194
17.5	1.63451	2.84467	2.47977	2.13652	1.74334	2.89099	1.47472	1.82974	2.33677	2.70855	2.11274	0.693324
18	1.54334	2.73029	2.63723	2.23068	1.73045	2.74925	1.38021	1.84892	2.12298	2.61143	2.12605	0.734507
18.5	1.57265	2.48055	2.73814	2.37561	1.74715	3.06591	1.18684	1.88639	2.00061	2.89822	1.9974	0.91853
19	1.70264	2.47385	2.54661	2.49942	1.67752	3.02037	1.3284	2.05431	1.98602	2.84993	1.98082	1.07036
19.5	1.79328	2.29791	2.11299	2.38558	1.73351	2.90868	1.4257	2.01669	1.97962	2.71957	1.96924	1.26708
20	1.86224	2.1412	2.135	2.23706	1.71374	3.03219	1.27021	2.02612	1.96458	2.83886	1.95388	1.44096
20.5	1.85587	2.13901	1.97963	2.20822	1.72417	3.038	1.44998	2.06142	1.9389	2.87972	1.92775	1.46853
21	1.83043	2.09138	2.01863	2.18415	1.66168	2.95659	1.44909	2.14382	1.89986	2.82743	1.94211	1.39858
21.5	1.66407	1.94639	1.67064	1.97957	1.58437	2.98242	1.37021	2.01605	1.93305	2.83164	1.94645	1.32417
22	1.61241	2.14406	1.66196	1.92752	1.56138	2.70231	1.50822	1.93352	1.87099	2.57529	2.06988	1.16347
22.5	1.53461	1.86765	1.98975	1.76065	1.48722	2.63334	1.41079	1.86841	1.83491	2.49041	2.13188	1.09629
23	1.50342	1.95366	2.56025	1.72049	1.57531	2.89826	1.32707	1.86082	1.93946	2.77095	2.12119	0.943099
23.5	1.52349	2.28069	2.44144	1.72521	1.61563	2.75695	1.45611	1.84088	1.91844	2.65314	2.18262	0.977684
24	1.65022	2.19916	2.60176	1.69957	1.58133	2.73711	1.34298	1.83506	1.93538	2.60855	2.14384	1.06145
0.5	1.81729	2.3093	2.61494	1.89917	1.57222	2.85065	1.33049	1.71529	1.96053	2.70757	2.12198	1.23612
1	2.00461	2.29081	2.68628	2.03674	1.65287	2.85477	1.43026	1.73135	1.8977	2.7045	2.13705	1.30345
1.5	2.09084	2.11418	2.68647	2.24182	1.69301	2.73824	1.48948	1.7308	1.927	2.58742	1.991	1.36778
2	1.96645	2.49708	2.56855	2.17348	1.7366	2.74147	1.51587	1.54732	1.94945	2.57778	1.90504	1.43469
2.5	2.02605	2.55214	2.4209	2.11252	1.70228	2.85201	1.60904	1.71449	1.9041	2.65855	1.94681	1.4807
3	1.96246	2.28416	2.48821	2.25517	1.8104	2.84279	1.57442	1.70125	1.99931	2.62134	1.90048	1.48334
3.5	1.85428	2.34153	2.43178	2.25016	1.80849	2.82978	1.52365	1.56381	2.04982	2.62201	1.94971	1.29868
4	1.72278	2.17622	2.49035	2.05412	1.86372	2.91016	1.50252	1.64309	2.12194	2.71294	1.95611	1.18847
4.5	1.70275	2.17104	2.71618	2.1153	1.81546	2.95195	1.35131	1.66075	2.27604	2.73823	2.02713	1.19091
5	1.63269	2.25569	2.7009	1.95559	1.78651	3.20141	1.26036	1.68639	2.32194	2.98028	2.07872	1.11725
5.5	1.71594	1.98383	2.67343	2.1328	1.73502	3.12873	1.26237	1.7868	2.304	2.92077	2.08258	1.04768
6	1.63332	1.9197	2.45848	2.12095	1.78964	2.76066	1.23332	1.66273	2.26584	2.56727	2.07903	1.14192
6.5	1.503	1.6716	2.46809	1.81279	1.66812	2.75424	1.24214	1.68334	2.23495	2.54511	2.0723	1.06783
7	1.48955	1.9077	2.36219	1.87882	1.70873	2.95808	1.30023	1.69286	2.20851	2.75671	2.04975	1.20313
7.5	1.47073	1.95028	2.54653	1.85416	1.62478	2.81029	1.35254	1.68918	2.23457	2.59452	2.0221	1.22335
8	1.54531	1.9633	2.44469	1.85346	1.60796	2.72794	1.49389	1.73872	2.17747	2.53953	2.00303	1.1428
8.5	1.48507	1.87025	2.45813	1.78205	1.6211	2.55292	1.6034	1.74295	2.20541	2.3698	2.02081	1.26866
9	1.52573	1.90765	2.51277	1.67033	1.6593	2.51201	1.6324	1.66182	2.22263	2.31372	2.01628	1.22458
9.5	1.45155	1.82327	2.49738	1.77633	1.57416	2.44943	1.68493	1.69299	2.28953	2.25386	2.01952	1.11725
10	1.66596	1.89976	2.47871	2.13958	1.62258	2.44207	1.72789	1.73526	2.58202	2.27045	2.08033	1.13905
10.5	1.64091	1.69594	2.5459	2.37229	1.59929	2.22228	1.57385	1.79703	2.88739	2.02124	2.27128	1.51075
11	1.82255	2.0271	2.38071	2.56772	1.61205	2.18423	1.47472	1.86842	2.86561	1.95754	2.47578	1.57198
11.5	1.80348	2.00907	2.2965	2.64106	1.63881	2.24629	1.40137	1.71342	2.95005	2.00152	2.50841	1.6096
12	1.9707	2.10492	2.29276	2.64625	1.66989	2.30974	1.41963	1.83344	3.01614	2.07464	2.61582	1.5143
12.5	2.1388	2.15491	2.26551	2.86053	1.76879	2.37135	1.4655	1.82422	3.09439	2.13407	2.76046	1.46757
13	2.21895	2.56597	2.33026	2.93328	1.79076	2.40424	1.45881	1.69627	3.15174	2.15293	2.78345	1.39003
13.5	2.13096	2.75459	2.27956	2.907	1.75463	2.394	1.43498	1.70749	2.87464	2.13382	2.78691	1.47622
