# Supplementary material for: Magnetic Fluctuations Entrain the Circadian Rhythm of Locomotor Activity in Zebrafish: Can Cryptochrome Be Involved?
Source: Biology (Basel). 2022 Apr 13;11(4):591. doi: 10.3390/biology11040591 (PMC9025847; doi:10.3390/biology11040591)
Supplement: Supplementary file 1 [file biology-11-00591-s001.zip › 2_stage-group2(magnet24_smoothed_for_periodogram).xlsx]

## Sheet: Sw_speed
Time	Fish#1	Fish#2	Fish#3	Fish#4	Fish#5	Fish#6	Fish#7	Fish#8	Fish#9	Fish#10	Fish#11	Fish#12
13.5	1.6687	1.90675	1.22024	1.19099	1.56385	1.314	0.841795	2.23143	1.91615	2.05943	1.17905	2.20099
14	1.67538	2.10947	1.2475	1.23555	0.995532	1.31576	0.610271	1.96717	2.15673	2.00655	1.49846	2.1455
14.5	1.39633	2.25896	1.6453	1.25541	0.980186	1.33586	1.25826	1.94172	2.02764	1.91482	1.57122	2.05087
15	1.38874	2.24902	2.03342	1.27063	0.488783	1.39264	1.22588	1.72419	2.00015	1.78915	1.71733	1.80183
15.5	1.38211	2.39228	2.05422	1.26964	0.357158	1.49394	1.19591	1.55487	1.98727	1.71407	1.64238	1.72687
16	1.35789	2.5032	1.99443	1.20478	0.235241	1.52515	1.02408	1.55169	2.11474	1.8354	1.66333	1.74898
16.5	1.39725	2.71191	2.19092	1.30955	0.164489	1.48367	1.03435	1.50776	2.30647	1.90278	1.56663	1.69601
17	1.66741	2.66686	2.2043	1.17318	0.344134	1.51533	0.948548	1.29184	2.20108	1.97419	1.49488	1.80067
17.5	1.69788	2.5178	2.65175	1.08928	0.321983	1.4299	0.959142	1.57349	2.06154	2.09224	1.36289	2.00967
18	1.7963	2.37193	2.32183	0.832225	0.319858	1.40867	0.20345	1.60187	2.11966	2.15824	1.38582	2.07335
18.5	2.15328	2.57147	1.93018	0.869928	0.151842	1.42977	0.203289	1.73915	2.1898	2.30288	1.36178	2.14709
19	2.13695	2.53423	2.04389	0.790628	0.0878434	1.44085	0.395927	1.6752	2.15928	2.2584	1.30601	2.05393
19.5	2.14706	2.52669	2.03061	0.793352	0.434843	1.37306	0.383624	1.50029	2.06214	2.2529	1.76901	2.05123
20	2.15562	2.44776	1.8322	0.821966	0.526348	1.39065	0.412671	1.57517	1.98706	2.21158	1.74622	2.031
20.5	1.84355	2.35941	1.86696	0.887451	0.331883	1.32662	0.419081	1.4631	2.03035	2.29689	1.74188	2.1569
21	2.18201	2.31953	1.35538	1.02681	0.485146	1.40646	0.813849	1.35819	2.03762	2.35755	1.42315	2.05844
21.5	2.38556	2.31566	1.39347	1.12873	0.429664	1.40675	0.855879	1.28019	2.04641	2.33263	1.4635	2.02217
22	2.05095	2.1671	1.22453	1.01505	0.401415	1.4121	0.859998	1.25307	1.88031	2.28145	1.31855	2.02897
22.5	1.89595	2.20976	0.84393	1.13545	0.380689	1.45772	0.781861	1.1904	1.99745	2.2018	1.22884	2.01568
23	1.87376	2.23122	0.606164	1.13365	0.0929857	1.57873	0.803654	1.30371	1.86615	2.18342	0.911146	1.94288
23.5	2.06822	2.23218	0.65472	1.01926	0.100904	1.70874	0.778922	1.05084	1.78201	2.12829	0.889161	1.87893
24	2.04807	2.27922	0.67578	1.02627	0.209308	1.83642	0.770586	1.17198	1.66516	1.99865	1.10651	1.71407
0.5	1.85699	2.56087	0.604765	0.937815	0.198429	1.88893	0.58795	1.20761	1.62721	1.88651	1.36963	1.62819
1	1.78123	2.93422	0.442054	1.04817	0.193215	1.89213	0.539574	1.26381	1.48404	1.93509	1.3274	1.60109
1.5	1.83568	3.01804	0.641921	1.0741	0.428264	1.9687	0.55116	1.31006	1.48132	1.89731	1.34778	1.47063
2	1.81131	3.05351	0.863176	0.972723	0.525341	2.70549	0.429077	1.39358	1.35723	1.91161	1.57066	1.41021
2.5	2.03624	3.1829	1.12842	0.879783	1.20011	2.79044	0.410896	1.35441	1.28589	1.9135	1.44186	1.40564
3	2.26014	3.39117	1.36195	0.937265	1.52496	2.95228	0.469552	1.56083	1.34784	2.12596	1.64003	1.54664
3.5	2.64191	3.65049	1.45896	0.985539	1.96418	2.89572	0.542604	1.80062	1.39498	2.15871	1.47636	1.47921
4	2.47878	4.15019	1.65275	0.992172	2.52734	2.92358	0.648342	2.03485	1.38272	2.17325	1.20075	1.47406
4.5	2.46395	4.35947	1.65068	1.04278	3.27246	3.02554	0.76102	2.32207	1.47695	2.21585	1.12849	1.53818
5	2.6204	4.72738	1.7673	1.03142	3.74481	2.88847	0.939444	2.4065	1.64621	2.34699	1.08552	1.67243
5.5	2.98914	4.73664	1.78874	1.16598	3.77697	1.93408	0.920994	2.64829	1.7175	2.54204	0.953248	1.85521
6	2.82126	4.88123	1.83086	1.29244	3.19405	1.83897	1.20256	2.76215	2.13132	2.79347	0.889809	2.05318
6.5	2.59015	4.94666	1.57945	1.2976	2.67558	1.59291	1.03028	2.61928	2.54474	2.87504	0.747866	2.10728
7	2.36042	5.01096	1.51154	1.45745	2.42487	1.57011	1.06395	2.32256	2.76828	3.07167	0.658722	2.30408
7.5	2.44559	4.35156	1.50284	1.48569	1.79977	1.59112	0.756976	2.21415	3.00287	3.04753	0.704069	2.35843
8	2.379	3.96491	1.59453	1.51846	1.11764	1.53834	0.67256	1.94759	3.22021	3.13686	0.751514	2.50464
8.5	2.25927	3.49686	1.52736	1.64484	0.419034	1.59075	0.723239	1.97121	3.27586	3.17639	0.801364	2.59971
9	2.00499	3.39095	1.71383	1.61338	0.338395	1.77949	1.19379	1.79734	3.25311	3.23436	0.848714	2.67049
9.5	1.87895	3.10031	1.75428	1.64475	0.256515	1.73345	0.944849	1.52951	3.09365	2.8708	0.932878	2.48634
10	1.70672	2.79471	1.97577	1.67023	0.306441	1.73303	0.935562	1.59059	2.78301	2.66863	0.988998	2.38793
10.5	1.59918	2.37656	2.00206	1.39707	0.0218448	1.78512	0.971023	1.80226	2.50255	2.39508	1.06158	2.20952
11	1.51572	2.30783	2.12289	1.35438	0	1.68191	0.958865	1.65701	2.42819	2.37696	1.14209	2.14668
11.5	1.71984	2.14532	2.53509	1.26037	0	1.64707	1.14544	1.87253	2.30088	2.20863	1.00943	2.00705
12	1.71861	2.05181	2.60571	1.15166	0.257359	1.62945	0.909313	1.81558	2.18976	2.08563	0.894345	1.93911
12.5	1.67699	2.0589	2.53789	1.11805	0.322219	1.53043	0.447623	1.80505	2.16408	1.90704	0.786479	1.86968
13	1.65311	2.00469	2.45981	1.18624	0.405977	1.55715	0.416756	2.06811	1.96192	1.94708	0.705191	1.90856
13.5	1.70206	1.98622	2.53505	1.07601	0.496335	1.52449	0.418559	2.00825	2.00844	1.97599	0.739962	1.88523
14	1.68801	1.92991	2.51131	1.05374	0.513414	1.46506	0.490257	1.81131	2.24902	2.0054	0.978059	1.95158
14.5	1.68468	2.00183	2.44077	1.07973	0.468736	1.25571	0.486554	1.89021	2.11993	2.0423	0.891873	2.12956
15	1.46623	1.97969	2.14266	1.11713	0.446951	1.31596	0.247527	1.53431	2.09244	2.02436	0.968928	2.10574
15.5	1.41223	2.0399	2.12123	1.09863	0.340516	1.37267	0.521521	1.58797	2.07956	2.03068	1.02682	2.13446
16	1.36982	1.99463	2.03351	1.06673	0.235339	1.43076	0.514968	1.37372	2.20703	2.34287	0.932173	2.24279
16.5	1.55961	2.05641	2.02117	0.916015	0.104125	1.39129	0.521121	1.44885	2.39876	2.43851	1.08509	2.31541
17	1.59766	2.0754	1.86158	0.886277	0	1.50989	0.948458	1.51735	2.29337	2.45228	0.969148	2.35409
17.5	1.61682	2.12282	1.82522	0.943594	0	1.52418	0.730071	1.50271	2.15383	2.43865	0.653577	2.30696
18	1.74975	2.06616	1.78893	0.987222	0.056326	1.81134	0.742727	1.44812	2.21195	2.4238	0.63104	2.17271
18.5	1.81211	2.0467	1.84366	0.824724	0.0701896	1.91992	0.834051	1.57471	2.28209	2.50916	0.579404	2.23152
19	1.84013	2.00158	1.77319	0.902936	0	1.82841	0.558584	1.49201	2.25157	2.44562	0.697445	2.08661
19.5	1.84957	1.87195	1.69721	0.91674	0	1.86774	0.553486	1.73121	2.15442	1.99265	0.727067	1.87073
20	1.80852	1.80909	1.63282	0.934654	0	1.74275	0.550629	1.68624	2.07935	1.89949	0.529091	1.72206
20.5	1.76474	1.67682	1.62517	0.994466	0.00368557	1.4639	0.130471	1.57537	2.12263	1.79247	0.615297	1.69112
21	1.82778	1.53073	1.9149	1.03969	0.168943	1.59861	0.138716	1.58029	2.12991	1.76702	0.662243	1.69072
21.5	1.7179	1.48385	1.90484	0.897634	0.0883983	1.59164	0.187787	1.5953	2.1387	1.72028	0.697979	1.68117
22	1.84629	1.638	1.99392	0.993898	0.136611	1.46759	0.0946293	1.56592	1.9726	1.62862	0.923276	1.58717
22.5	1.82864	1.75199	2.21005	1.00116	0.136984	1.56519	0.108016	1.64255	2.08974	1.59044	0.845625	1.58162
23	2.11246	1.91902	2.38779	0.96148	0.133394	1.56418	0.10882	1.57806	2.21042	1.59031	0.831722	1.53407
23.5	2.16112	2.08204	2.4392	1.012	0.0563789	1.67789	0.165563	1.63773	2.45591	1.55296	0.997376	1.57784
24	2.09347	2.30564	2.48515	0.972855	0.194053	1.93939	0.159538	1.7096	2.39803	1.63243	0.903301	1.68008
0.5	1.97972	2.60982	2.23153	1.06158	0.035751	1.832	0.155704	1.87333	2.53552	1.73561	0.890271	1.71152
1	1.94024	2.74237	2.60116	1.15673	0.0436574	1.86842	0.10541	1.94429	2.60366	1.76077	0.965421	1.74425
1.5	1.48801	2.69845	2.5269	1.17314	0	1.88444	0.111857	1.72207	2.75801	1.86352	0.76591	1.87275
2	1.59128	2.79148	2.35693	1.21442	0	1.83192	0.0967891	1.77869	2.69874	1.94873	0.752453	1.94356
2.5	1.47048	2.84076	2.35248	1.37895	0.247935	1.73631	0.0975928	1.84922	2.61491	2.06901	0.830111	2.04458
3	1.48667	2.65035	2.48243	1.36738	0.582281	1.80136	0.18103	1.78843	2.57909	2.12746	0.755603	2.05859
3.5	1.52065	2.60534	2.46033	1.52681	0.459	1.65283	0.626834	1.84523	2.62724	2.09303	0.764267	1.99482
4	1.60269	2.76005	2.47377	1.46265	0.561911	1.60623	0.884865	1.99935	2.6366	2.06695	0.790476	2.07073
4.5	1.62431	2.87396	2.36169	1.47173	0.573691	1.58917	0.98601	1.95764	2.66645	1.971	0.682379	2.03718
5	2.12448	3.27326	2.23188	1.32297	0.719567	1.54373	1.12817	2.23565	2.71753	1.87801	0.653985	1.95199
5.5	2.06141	3.29119	2.25718	1.48734	0.742231	1.57283	1.24324	2.06891	2.7991	1.90396	0.622574	1.91836
6	1.95583	3.41294	2.11299	1.61697	0.720124	1.67763	1.25174	2.03025	3.03422	2.01347	0.577308	2.02132
6.5	2.03471	3.67132	2.01219	1.6026	0.398368	1.56253	1.49766	2.14763	3.1711	2.05744	0.549534	2.0588
7	2.0257	3.72572	2.06657	1.82536	0.561204	1.7464	1.60653	2.11489	3.37814	2.31247	0.597152	2.17253
7.5	2.17757	3.47322	2.1032	2.1649	0.551828	1.8584	1.57615	1.8573	3.38964	2.36232	0.529344	2.20052
8	2.19723	3.35768	2.09202	2.16304	0.743464	1.7381	1.46759	1.84127	3.40483	2.58932	0.566462	2.33139
8.5	1.99961	2.88722	2.18629	2.34497	0.724019	1.80061	1.71593	1.86153	3.52999	2.78463	0.814676	2.43087
9	1.99789	2.733	2.46556	2.1963	0.803782	1.73688	2.04041	1.91029	3.56901	2.758	0.964548	2.44699
9.5	1.99807	2.67866	2.28323	1.9403	0.71422	1.45446	2.15042	1.89079	3.53064	2.65624	0.973957	2.33164
10	1.8932	2.54541	2.30244	1.95696	0.873982	1.61375	1.77223	1.75935	3.5097	2.54873	1.0334	2.28821
10.5	1.92856	2.40047	2.30214	1.69423	1.23455	1.5563	1.2232	1.71651	3.38643	2.17404	1.02927	2.13936
11	1.76544	2.34356	2.18658	1.31283	1.15724	1.53457	1.00177	1.69341	3.32563	2.13844	1.02144	2.09767
11.5	1.77657	2.11916	1.99892	1.26479	0.964036	1.58362	1.00863	1.69929	3.32864	2.08666	1.17052	2.0204
12	1.75812	2.25212	1.77957	1.18453	1.26333	1.53676	0.624254	1.65131	3.10936	1.98634	1.26094	2.05023
12.5	1.76098	1.92522	1.53941	1.13832	1.50894	1.58451	0.196395	1.65225	3.10475	1.97086	1.16522	2.00608
13	1.76881	1.62074	1.78025	1.17313	1.63122	1.80421	0.083588	1.63067	2.96592	1.94568	1.15611	2.01239
13.5	1.74006	1.42235	1.50173	1.16156	1.64743	1.8648	0.0850218	1.59503	2.76747	1.89159	1.28431	1.98103
14	1.7119	1.33406	1.37385	1.36868	1.21872	1.80355	0.0805922	1.46792	2.76483	2.09138	1.4586	2.02046
14.5	1.66538	1.26037	1.39485	1.60354	1.24162	1.74866	0.0774301	1.38783	2.71439	1.88892	1.55153	1.86897
15	1.66509	1.36129	1.33261	1.80182	1.35502	1.71163	0.0766222	1.21394	2.8607	1.7779	1.35845	1.76436
15.5	1.74066	1.29002	1.50665	1.93447	1.14969	1.77042	0.070858	1.2321	3.03337	1.52475	1.08047	1.64619
16	1.8222	1.60741	1.32328	2.16259	0.830534	1.82921	0.0667031	1.25182	2.89169	1.38775	1.09001	1.64919
16.5	1.79627	1.58203	1.27386	2.16482	0.576459	1.79069	0.0651249	1.09851	2.88915	1.18159	1.12523	1.49011
17	1.87899	1.51987	1.58872	2.27729	0.599597	1.73691	0.274846	1.12238	2.84648	1.26094	1.00761	1.50397
17.5	1.87631	1.70213	1.68919	2.05679	0.512777	1.85971	0.622934	1.23121	2.77939	1.13671	0.799822	1.43104
18	1.89921	1.87021	1.71574	1.83911	0.813071	1.7098	0.630413	1.32068	2.75987	1.28389	0.73789	1.4632
18.5	1.8651	1.75436	1.69033	1.67583	0.884208	1.74303	0.632144	1.49821	2.45109	1.27327	0.815666	1.48669
19	1.842	1.67843	1.62764	1.55737	0.6861	1.70318	0.62997	1.48655	2.3108	1.34597	0.748679	1.34905
19.5	1.70328	1.60462	1.48527	1.22252	0.681904	1.76284	0.940272	1.49169	2.22958	1.51051	0.665691	1.39638
20	1.71592	1.45355	1.55317	1.1554	0.897539	1.87869	1.19851	1.7402	2.12955	1.75973	0.653408	1.5869
20.5	1.72635	1.33384	1.30158	0.898747	1.04634	1.83337	1.3016	1.99064	2.07388	1.63899	0.647559	1.49734
21	1.8876	1.15874	1.65018	0.874334	1.03946	1.72869	0.964166	2.05437	2.0191	1.71878	0.644145	1.56277
21.5	1.90058	1.06928	1.68217	0.81242	1.05317	1.66502	1.05201	2.12797	1.93175	1.7291	0.711319	1.58441
22	1.98933	1.21706	1.72252	0.801014	1.44768	1.71217	1.54491	2.13498	1.94261	1.57611	0.767959	1.50596
22.5	1.92148	1.19481	1.79083	0.920848	1.78764	1.74055	1.60245	2.14425	1.78136	1.55449	0.95892	1.50745
23	1.9286	1.29146	1.97857	1.03802	1.8872	1.65142	1.29994	2.15208	1.84684	1.43837	0.897085	1.46511
23.5	1.88392	1.4946	2.02045	1.0096	1.67855	1.55279	1.14048	1.84129	1.67441	1.26721	0.979951	1.32532
24	1.73177	1.67459	2.20786	1.15992	1.47903	1.82802	0.934919	1.56313	1.67978	1.44412	1.04817	1.57475
0.5	1.53802	1.79905	1.92117	1.31334	1.48101	1.8715	1.13969	1.52968	1.63471	1.37155	1.20575	1.59273
1	1.58439	1.91593	1.95491	1.42683	1.4191	2.28716	1.04696	1.50222	1.68952	1.41306	1.44625	1.64154
1.5	1.74288	1.93457	2.03398	1.56	1.15813	2.49948	0.707587	1.63124	1.64317	1.54261	1.68408	1.74353
2	1.73084	2.26343	2.04906	1.48229	0.947419	2.52528	0.974441	1.64899	1.71952	1.6134	1.52795	1.82973
2.5	1.72679	2.09186	2.1289	1.48486	0.964103	2.76894	0.966049	1.66807	1.61982	1.70687	1.66992	1.89296
3	1.8345	2.37805	2.09494	1.58178	1.16079	2.85452	1.12684	1.89192	1.70267	1.85604	1.87326	2.0068
3.5	2.03463	2.51532	2.36146	1.62507	1.08819	2.67383	1.01894	1.90004	1.6168	1.86291	1.76037	1.84451
4	2.09783	2.5383	2.34105	1.51373	1.09588	2.66237	0.971081	1.91158	1.66146	2.01902	1.60323	1.87263
4.5	1.91049	2.66291	2.23948	1.63176	0.955498	2.54477	0.988896	1.8062	1.66284	1.87402	1.39214	1.79566
5	1.72309	2.87199	2.27159	1.54509	0.813777	2.29904	1.16821	1.93439	1.76306	1.9956	1.09806	1.85186
5.5	1.68081	2.66554	2.29118	1.51448	0.822583	2.33193	0.851059	2.70277	1.93276	2.10411	1.17003	1.96359
6	1.76785	2.91123	2.29892	1.55225	0.733448	2.04969	1.21005	2.66704	2.10109	2.13547	1.08994	1.97047
6.5	1.69156	2.81355	2.2621	1.66445	0.585928	2.08476	1.09079	2.69931	2.39297	2.18115	0.904672	2.06603
7	1.57054	2.89313	1.98569	1.63962	0.783499	2.2655	1.14265	2.77254	2.56459	2.27994	1.05188	2.17687
7.5	1.62085	2.95566	1.90293	1.61467	1.2899	2.28879	0.994072	2.83814	2.64502	2.23429	1.04986	2.12879
8	1.85182	2.92115	1.86243	1.61102	1.39109	2.23093	1.20129	2.89179	2.84268	2.18398	1.04043	2.14819
8.5	1.94853	2.73469	1.87729	1.74194	1.38772	2.33996	0.873082	2.65022	3.33284	1.98413	1.04434	2.04789
9	2.14723	2.69672	1.76583	2.01941	1.39063	2.26061	0.980414	2.06956	3.49553	1.99697	0.923869	2.10938
9.5	2.39499	2.57635	1.62401	2.08749	1.55266	2.50414	0.622142	2.08951	3.62348	2.03393	0.985402	2.37761
10	2.62612	2.53274	1.62993	1.93972	1.65267	2.59615	0.501109	2.13102	3.5959	2.07666	1.18015	2.32198
10.5	2.70512	2.53193	1.58054	1.75958	1.52097	2.35048	0.678632	2.1058	3.93054	1.95948	1.03569	2.25014
11	2.70576	2.56604	1.55815	1.68117	1.08759	2.48554	0.667601	2.01209	4.0059	1.89609	1.29514	2.23061
11.5	2.65632	2.48048	1.64495	1.83246	0.875406	2.49191	0.639395	2.08	3.95562	1.90767	1.31865	2.22559
12	2.60486	2.53175	1.5742	1.71968	1.08106	2.44136	0.639826	2.04326	3.78648	2.06014	1.27868	2.25786
12.5	2.47352	2.53663	1.51116	1.46797	1.51621	2.76128	0.536529	1.8371	3.72168	2.08296	1.3244	2.15337
13	2.19535	2.51844	1.548	1.35533	1.38844	2.59542	0.811352	1.83038	3.77724	2.07314	1.37421	1.93471
13.5	2.0339	2.41422	1.54294	1.447	1.34621	2.4983	1.13074	1.77279	3.77358	1.97639	1.0256	1.87666
14	2.02709	2.43632	1.60305	1.70783	1.26471	2.40334	0.906254	1.80487	3.44874	2.11179	1.03982	1.93523
14.5	2.25571	2.5406	1.92782	1.71905	1.20788	2.26286	0.906535	1.87277	3.721	2.12435	0.695138	1.95111
15	2.21073	2.40195	1.88962	1.38724	1.21204	2.37029	0.716218	1.84707	3.86175	2.34834	0.610064	2.03463
15.5	1.94116	2.49363	1.82069	1.37182	1.23624	2.34179	0.714781	2.01029	3.68773	2.44135	0.674408	2.10185
16	1.90703	2.41685	1.92553	1.45818	0.683664	2.12836	0.756996	1.95565	3.50321	2.44842	0.655506	2.09698
16.5	1.88789	2.469	1.80738	1.49755	0.676515	2.30745	0.713579	2.02023	3.31146	2.64188	0.709336	2.15066
17	1.7699	2.57681	1.96925	1.5392	0.588945	2.21194	0.384194	2.0318	3.21921	2.63041	0.768139	2.16581
17.5	1.9117	2.45928	2.24202	1.47134	1.24567	2.34083	0.384881	2.01572	3.17166	2.59988	0.691408	2.22435
18	1.62025	2.21291	1.94274	1.56966	1.25343	2.20086	0.388307	2.00785	2.78584	2.54864	0.932572	2.19365
18.5	1.60383	2.29044	2.02304	1.68842	1.50937	2.23451	0.624657	1.98573	2.4849	2.50971	1.16987	2.17084
19	1.75916	1.99693	1.83326	1.70309	1.2061	2.20022	1.14463	1.95059	2.26708	2.41817	1.12316	2.13358
19.5	1.7779	2.10488	2.01945	1.66411	1.30664	2.15735	1.26032	2.0397	2.23085	2.36501	1.19168	2.11286
20	1.76002	1.82796	2.18857	1.66008	1.40811	1.94203	1.24347	2.13904	2.12985	2.08963	1.04423	1.99644
20.5	1.80611	1.81853	1.93361	1.54819	1.46099	2.09337	1.52424	2.20342	2.07404	2.13394	1.04479	2.09696
21	1.55156	1.88874	1.45748	1.62303	0.862864	2.15437	1.5201	2.198	2.00793	2.08071	1.12175	2.00001
21.5	1.41117	1.72771	1.56301	1.61361	1.31871	2.06288	1.51796	2.19908	1.9379	2.15603	1.1253	2.05858
22	1.39335	1.4582	1.52153	1.59202	1.51617	1.90434	1.34859	2.43319	1.95314	1.99467	0.906349	1.93152
22.5	1.48252	1.48688	1.72144	1.60825	1.45273	1.99221	1.07665	2.3687	1.89791	2.06274	0.956926	2.01572
23	1.47019	1.33221	1.53612	1.5985	1.58682	1.88854	0.917446	2.37209	1.87163	2.08584	0.900736	2.07461
23.5	1.51016	1.55718	1.51526	1.58015	1.66575	1.79655	0.709601	2.20085	1.82682	2.12706	0.990574	2.05376
24	1.4644	1.37188	1.68214	1.52276	1.62639	1.45229	0.67034	2.18699	1.75202	2.04676	1.28113	1.92365
0.5	1.50793	1.14259	1.84568	1.39263	1.54426	1.07775	0.876563	2.06368	1.72583	1.9303	1.38237	1.90392
1	1.64802	1.41603	1.53394	1.37195	1.09114	1.19003	1.04916	2.07101	1.74321	1.93488	1.33742	1.90169
1.5	1.66151	1.65974	1.5596	1.27234	0.801454	1.08522	0.981424	1.84162	1.68103	2.04455	1.45085	2.00379
2	1.50652	1.64954	1.59954	1.30723	0.899205	1.01955	0.736751	1.85446	1.7225	1.91649	1.45329	1.9469
2.5	1.42733	1.49619	1.64492	1.37476	0.676347	1.12521	0.764106	1.66196	1.67002	1.94488	1.55961	1.93131
3	1.45108	1.43973	1.65021	1.35737	0.474891	0.97322	0.759504	1.74028	1.80879	1.98856	1.62241	1.99068
3.5	1.5653	1.7771	1.64722	1.45313	0.512894	1.33349	0.515848	1.75619	1.93003	2.06199	1.51853	2.02554
4	1.58387	2.11549	1.6879	1.41182	0.517787	1.6157	0.576527	1.89193	1.97265	2.02422	1.37876	1.93268
4.5	1.65627	2.18095	1.85672	1.39595	0.833075	1.75902	0.511732	1.84587	2.04557	1.87895	1.19016	1.83647
5	1.74408	2.19305	1.85013	1.49261	0.77517	1.93781	0.520162	1.9162	2.16737	1.91376	1.16645	1.87037
5.5	1.94133	2.3397	1.86739	1.40731	0.80918	1.93469	0.704125	1.97174	2.2364	2.05609	1.33359	1.88949
6	2.09096	2.84707	1.75379	1.40186	1.30171	2.08162	0.868491	2.16669	2.28145	2.12227	1.33782	1.92897
6.5	1.98794	2.82945	1.77124	1.38631	1.48178	2.3139	0.879094	2.14035	2.21643	2.26389	1.1728	1.96059
7	2.06289	2.49439	1.49284	1.46829	1.74264	2.28886	0.926603	2.09114	2.15597	2.21453	0.98442	1.96185
7.5	2.02435	2.43635	1.35775	1.71565	1.99713	2.32284	0.66279	2.1369	2.16109	2.34384	1.04891	2.06847
8	2.01234	2.31582	1.44381	1.88192	1.80788	2.27429	0.689474	2.13575	2.1888	2.50983	1.15237	2.17491
8.5	1.94848	2.30297	1.44998	1.93998	1.72261	2.24884	0.834318	2.11817	2.16871	2.52066	1.04913	2.17454
9	1.80177	2.20903	1.49722	1.96664	1.78939	2.27318	0.870322	2.03946	2.20143	2.33913	0.930045	2.07454
9.5	1.80461	1.84831	1.62652	1.89863	1.38396	2.17915	0.67614	2.05892	2.22197	2.29426	0.894577	2.07317
10	1.87956	1.91619	1.41208	1.96455	1.33908	2.14447	0.673375	2.02775	2.3647	2.1126	0.942273	1.95461
10.5	1.67684	2.38725	1.50043	1.87292	1.15968	2.11288	0.862796	2.11183	2.86841	2.18181	1.07556	1.94886
11	1.77912	2.31401	1.63632	1.62955	1.23688	1.98986	1.03613	1.8038	3.26187	2.15408	1.19496	1.93859
11.5	1.74195	2.3334	1.39273	1.5117	1.11887	2.00135	0.901998	1.94321	3.33409	1.9305	1.19051	1.84106
12	1.79242	2.24406	1.38425	1.47627	1.12215	2.18272	0.751172	1.88965	3.48377	1.87884	1.26229	1.8236
12.5	1.86554	2.29826	1.27251	1.63321	1.08478	2.15791	0.531247	1.91934	3.60177	2.14963	1.16838	1.98259
13	1.86868	2.50867	1.08255	1.65902	1.01784	2.04918	0.53205	1.90191	3.73083	2.05179	1.19361	1.85571
13.5	2.05889	2.676	1.38041	1.67975	0.966069	2.13951	0.528068	1.89352	3.84956	2.02844	1.25582	1.87748
