# Supplementary material for: Magnetic Fluctuations Entrain the Circadian Rhythm of Locomotor Activity in Zebrafish: Can Cryptochrome Be Involved?
Source: Biology (Basel). 2022 Apr 13;11(4):591. doi: 10.3390/biology11040591 (PMC9025847; doi:10.3390/biology11040591)
Supplement: Supplementary file 1 [file biology-11-00591-s001.zip › 2_stage-group3(magnet24_smoothed_for_periodogram).xlsx]

## Sheet: Sw_speed
Time	Fish#1	Fish#2	Fish#3	Fish#4	Fish#5	Fish#6	Fish#7	Fish#8	Fish#9	Fish#10	Fish#11	Fish#12
13	1.86887	3.08558	1.64336	1.90163	3.8793	1.85364	1.45325	0.705583	3.14441	2.31873	2.2019	1.63202
13.5	1.88099	3.1565	1.36696	1.95578	3.5552	2.09568	1.2679	0.719097	2.86106	2.25026	2.20585	1.8283
14	1.94253	3.03502	1.29221	2.07121	2.9616	1.85808	1.17175	0.713283	2.68488	2.15366	2.14922	2.15365
14.5	1.90401	2.85316	1.18545	2.20632	2.71905	1.6137	1.1502	0.712505	2.42047	1.7721	2.08061	2.45753
15	1.84055	2.58875	1.28733	2.29256	1.58301	1.25169	1.06178	0.709812	2.08938	1.74713	1.88251	2.70645
15.5	1.81557	2.43623	1.55685	2.19946	1.45232	1.25449	1.13574	0.225365	1.79149	1.64435	1.74644	2.8543
16	1.76175	2.36333	1.53449	2.53167	1.52264	1.382	0.792103	0.0745975	1.47456	1.46357	1.53617	3.14617
16.5	1.6127	2.32375	1.81965	2.42404	1.59011	1.34115	0.799762	0.364642	1.31707	1.56061	1.41831	3.15003
17	1.74024	2.2597	2.23145	2.35496	1.44784	1.25472	1.03394	0.342972	1.30126	1.88846	1.34659	2.98139
17.5	1.56142	2.16563	2.25124	2.39775	1.24286	1.24616	1.11533	0.334836	1.13047	1.93904	1.28554	2.76808
18	1.58107	2.08223	2.24185	2.3025	1.06548	1.53468	1.25265	0.338251	1.25512	1.96102	1.34195	2.45865
18.5	1.60773	2.40573	2.00115	2.248	1.03875	1.54663	1.31758	0.338096	1.17029	1.77955	1.25359	2.25229
19	1.58472	2.3579	1.84502	2.3568	1.00083	1.41636	1.12256	0.339329	1.12564	1.82833	1.45163	2.20827
19.5	1.5215	2.3275	1.71903	1.98081	0.954159	1.41898	1.34796	0.339174	1.20554	1.84281	1.47571	2.10015
20	1.49529	2.23154	1.5918	1.88506	0.719438	1.42915	1.19257	0.0442581	1.04756	2.03819	1.39571	2.0872
20.5	1.37937	1.89634	1.23172	1.88914	0.602688	1.28203	1.32814	0.0441033	1.21572	1.75994	1.32467	2.03994
21	1.37813	1.88558	1.05678	1.89098	0.797535	1.4943	1.42124	0.043016	1.23213	1.71624	1.34707	1.90746
21.5	1.31683	1.9642	1.05664	1.81823	0.708102	1.20497	1.28057	0.050032	1.03282	1.76086	1.17979	1.89036
22	1.25047	1.59563	1.03837	1.82503	0.846573	1.282	1.33534	0.0498772	1.13217	1.83594	1.18963	1.88525
22.5	1.05694	1.52498	0.947826	1.612	0.825587	1.49245	1.55034	0.048335	1.15768	1.656	1.03379	1.87351
23	1.04216	1.44095	1.01361	1.64318	0.786065	1.20027	1.45119	0.0507949	1.1536	1.59026	1.02235	1.87559
23.5	0.985346	1.34024	0.83791	1.39825	0.926243	1.27355	1.55435	0.0499814	1.21543	1.3789	1.14453	1.77103
24	1.10645	1.65697	0.921801	1.13558	1.06106	1.40259	1.4181	0.0507252	1.11175	1.33947	1.22985	1.76298
0.5	1.11845	1.78357	1.14759	1.13159	0.862233	1.50141	1.20284	0.0541953	1.04244	1.19754	1.16497	1.68287
1	1.19506	1.75892	1.38442	1.34296	1.05583	1.47038	1.37832	0.0443627	1.06816	0.985219	1.18756	1.67225
1.5	1.19465	2.04189	1.41938	1.36576	0.952961	1.60116	1.45593	0.0442079	0.933245	0.85359	1.23935	1.60253
2	1.39243	2.10722	1.48763	1.40029	1.07616	1.58899	1.47659	0.0481085	1.05952	0.877223	1.25135	1.4363
2.5	1.58835	2.25546	1.48652	1.54016	0.802595	1.59478	1.53472	0.120407	1.23437	0.964275	1.42731	1.45195
3	1.69096	2.49014	1.35158	1.95293	0.866666	1.55975	1.81921	0.118849	1.40628	0.817191	1.43908	1.46645
3.5	1.69917	2.57827	1.30732	2.32111	1.31206	1.31482	1.78078	0.164047	1.29055	0.806466	1.22314	1.60632
4	1.79542	2.76978	1.26683	2.34268	1.63263	1.2935	2.06387	0.173764	1.39095	0.92853	1.23985	1.68202
4.5	1.88979	2.89035	1.14772	2.34288	1.74257	1.75736	2.04707	0.179532	1.49786	1.05768	1.26191	1.75521
5	2.13278	2.87841	1.01899	2.44558	1.95146	2.01138	2.0147	0.448133	2.00824	1.2042	1.44424	1.84738
5.5	2.29076	2.98931	1.00515	2.42741	2.03511	1.6918	2.0524	0.669652	2.07684	1.36648	1.45368	1.94302
6	2.17235	2.97036	1.26635	2.36579	2.39677	1.97468	2.10183	0.989953	2.18839	1.35473	1.45064	1.89265
6.5	2.27437	3.00755	1.48731	2.32662	2.52833	1.63437	1.92058	0.997212	2.35434	1.5197	1.49199	1.92971
7	2.25319	3.04521	1.63364	2.41965	2.34374	1.63582	1.90692	0.959998	2.78142	1.66209	1.74266	1.92732
7.5	2.19788	2.81114	1.62607	2.74677	2.42399	1.65835	1.9088	0.948667	3.01725	1.83814	1.90288	2.01182
8	2.0615	2.65932	1.51044	2.62932	2.80921	1.55694	1.91894	1.08108	3.00531	1.98247	1.93609	2.03388
8.5	1.93063	2.65066	1.68968	2.61101	3.30213	1.20325	1.84735	1.45798	2.59816	2.06292	1.76851	2.0816
9	1.95263	2.55236	1.7177	2.78219	3.66064	1.51838	1.78028	1.24112	2.26726	2.04672	1.62669	2.11434
9.5	1.7498	2.55172	1.61901	2.77957	3.901	1.55801	1.54136	1.14714	2.05578	2.08957	1.54936	2.12095
10	1.66116	2.49097	1.58308	2.68754	3.93451	2.11512	1.6506	1.22786	1.70828	2.04613	1.40662	2.08809
10.5	1.52894	2.4274	1.55311	2.59375	3.96964	2.43929	1.69919	1.60941	1.31051	1.91701	1.23657	1.94681
11	1.50567	2.48869	1.47799	2.25204	4.15026	2.45337	1.71243	2.13158	1.02955	1.84386	1.01522	1.93845
11.5	1.56516	2.54931	1.53122	2.28302	3.75672	2.27848	1.73771	2.27521	0.97715	1.82255	0.927467	1.90926
12	1.60816	2.61101	1.41802	2.14084	3.15008	2.38862	1.52869	1.62924	0.910106	1.85397	0.824008	1.85278
12.5	1.57919	2.54731	1.39367	1.79333	2.74514	2.30796	1.56186	2.30418	0.92722	1.8856	0.793708	1.87986
13	1.74228	2.52454	1.23375	1.8647	2.50573	1.98133	1.77493	2.0127	0.837574	1.76305	0.776351	1.8907
13.5	1.66753	2.48318	1.25812	1.76511	2.34812	1.42096	1.57312	1.93756	0.811708	1.84119	0.888521	2.07378
14	1.78236	2.39485	1.27709	1.59534	2.14642	1.42199	1.56187	2.05842	0.784012	2.1531	0.822245	2.20938
14.5	1.82688	2.23802	1.36094	1.81669	1.8791	1.30805	1.54611	1.59259	0.848807	2.10472	0.899188	2.14686
15	1.74107	2.20906	1.3136	1.76605	1.74881	1.30125	1.43686	2.13937	0.821249	2.20703	0.903288	2.10947
15.5	1.6738	2.128	1.33894	1.69956	1.79655	1.38614	1.68153	2.13922	0.829736	2.12989	0.870004	2.07878
16	1.73334	2.18823	1.35747	1.93104	1.73475	1.55192	1.7157	1.45495	0.97162	2.1831	1.01862	2.09275
16.5	1.91272	1.93034	1.39679	1.77058	1.67785	1.89892	1.83813	1.44442	0.970991	2.31195	0.944756	2.15245
17	1.92474	1.95895	1.35183	1.94063	1.71477	2.2013	1.96215	1.43357	0.969268	2.26092	0.80542	2.06537
17.5	1.8036	1.88931	1.35156	2.03906	1.68588	2.1655	2.00198	0.921503	1.04167	1.9962	0.844103	1.88996
18	1.82413	1.66804	1.34758	1.97862	1.59658	2.2614	1.82043	0.865473	0.999296	2.01818	0.791107	1.89016
18.5	1.71223	1.57314	1.34264	1.8507	1.62495	2.23721	1.8933	0.045637	0.966807	1.7681	0.823448	1.93002
19	1.70754	1.63959	1.28488	1.94348	1.5362	2.15541	1.80553	0.227044	0.919546	1.79259	0.812212	1.91793
19.5	1.43661	1.36555	1.24176	1.85349	1.5158	2.01512	1.54312	0.228958	0.841017	1.60568	0.689229	1.83992
20	1.2182	1.63405	1.34115	1.76054	1.48755	1.76086	1.48618	0.235737	0.811782	1.62704	0.719898	1.84441
20.5	1.20085	1.34299	1.26595	1.69288	1.19318	1.71897	1.19649	0.232971	0.866323	1.62315	0.749362	1.84955
21	1.18863	1.47267	1.16932	1.70309	1.40407	1.72723	1.29344	0.796075	0.830123	1.65147	0.750801	1.86719
21.5	1.09705	1.56393	1.23725	1.51176	1.48388	2.00958	1.53665	0.796974	0.806646	1.59204	0.848755	1.94937
22	1.18542	1.58244	1.24385	1.78566	1.57583	1.87295	1.57962	1.01402	0.835687	1.63865	0.836866	1.92459
22.5	1.19583	1.47601	1.38311	1.75816	1.49389	1.79149	1.72215	0.832306	1.00775	1.58061	0.915934	1.97318
23	1.16149	1.78001	1.46414	1.95898	1.49647	1.52576	2.01473	1.64528	1.03972	1.67522	0.989666	2.01201
23.5	1.05457	1.76921	1.18181	2.04704	1.44398	1.57153	2.03782	1.6414	1.08851	1.78788	0.976836	2.03219
24	0.990947	2.03548	1.25952	2.10855	1.5446	1.75345	2.33424	2.48751	1.01575	1.72413	0.952686	2.13748
0.5	1.11113	1.96419	1.23543	1.9057	1.37621	1.59886	2.32714	1.93112	1.04489	1.79194	1.01892	2.17315
1	1.1363	2.41645	1.14209	1.86254	1.34264	1.35104	2.30466	1.93025	0.835175	1.90749	0.824216	2.16757
1.5	1.13916	2.38368	1.15833	1.46898	1.26756	1.58547	2.3562	1.70393	0.873689	1.98856	0.848092	2.27956
2	1.27929	2.36314	1.20403	1.50366	1.46062	1.63485	2.39436	1.70378	0.784127	2.05352	0.851873	2.31802
2.5	1.36519	2.32818	1.20477	1.49873	1.58443	2.00332	2.34331	0.889897	0.86822	2.03728	0.866371	2.42022
3	1.56333	2.27456	1.33873	1.44495	1.83151	1.89543	2.3377	1.47133	0.806049	1.93581	0.846498	2.51864
3.5	1.62707	2.05799	1.3737	1.33872	2.09238	1.95528	2.27046	0.627598	0.827272	2.15517	0.851832	2.42198
4	1.51427	2.00338	1.47182	1.50245	2.20112	2.22714	2.23411	0.623291	0.778492	2.19881	0.756185	2.42571
4.5	1.83472	1.45823	1.48708	1.4966	2.57582	2.27687	2.18648	0.701066	1.02011	2.15405	0.86076	2.36141
5	1.91305	1.31832	1.4614	1.92876	3.01981	2.38382	2.09941	0.699277	1.11787	2.01218	0.886019	2.24844
5.5	1.72103	1.61817	1.31581	1.89857	3.36886	2.67183	1.99291	0.702278	1.21669	2.06998	0.887923	2.17547
6	1.74792	1.71806	1.24083	1.94953	3.71304	3.0324	1.98088	0.700651	1.1848	2.10715	0.86037	2.11249
6.5	1.67452	1.90493	1.25432	2.04584	3.8352	3.19625	1.92854	0.115697	1.22777	2.08641	0.893174	1.98481
7	1.67674	2.02589	1.28771	2.0058	3.84148	3.06623	1.82694	0.113862	1.29831	2.06993	0.895469	1.98324
7.5	1.79557	1.96327	1.13214	2.05407	3.93976	3.03883	1.5083	0.422263	1.3782	2.06938	0.949297	2.02541
8	1.43316	2.36952	1.22874	1.99268	3.91436	3.1355	1.39867	0.397999	1.27947	2.07364	1.01228	2.04569
8.5	1.5305	2.69672	1.23611	2.13513	3.79385	3.27535	1.32523	0.506486	1.27142	2.1413	1.08407	2.06035
9	1.57738	2.3665	1.30251	2.32156	3.72062	3.12234	1.30156	0.727567	1.11108	2.04492	1.02481	2.17269
9.5	2.01898	2.33318	1.35057	2.23266	3.34571	2.74002	1.32263	0.727412	1.12701	2.03979	1.05384	2.25952
10	2.34344	2.18488	1.5115	2.20955	3.13195	2.88689	1.40432	0.728366	1.15285	2.12904	1.0643	2.15208
10.5	2.37492	2.29394	1.48603	2.27053	3.26638	2.85528	1.38771	0.730166	1.172	2.1063	1.07104	2.14586
11	2.10226	2.46772	1.58934	2.13131	3.12309	2.73723	1.44431	0.426651	1.16752	2.02643	1.14447	2.17188
11.5	2.26877	2.33752	1.60764	2.28629	2.9298	2.48196	1.59867	0.514923	1.21248	2.16057	1.21225	2.23924
12	2.11764	2.30933	1.48783	1.95606	2.74276	2.05582	1.77358	0.551804	1.16457	2.10632	1.13782	2.18715
12.5	2.14582	2.39935	1.41818	2.02375	2.52005	1.90537	1.84719	0.472934	1.24049	2.12143	1.16429	2.1452
13	1.64929	2.19962	1.37948	2.09014	2.46518	1.76509	1.83279	0.618456	1.41072	2.09852	1.31713	2.08367
13.5	1.33813	2.21163	1.2129	2.09081	2.38724	1.74153	1.8047	0.889931	1.34664	1.96311	1.36504	2.17778
14	1.28709	2.07427	1.28521	2.07943	2.21125	1.62054	2.0458	1.00102	1.23746	1.82502	1.35827	2.16016
14.5	1.59	2.05871	1.4973	2.07555	2.14551	1.68019	2.23168	0.995158	1.40048	1.70377	1.36333	2.15706
15	1.50029	2.21426	1.3735	2.00073	2.03935	1.45044	2.02361	1.46508	1.49488	1.37947	1.28166	2.18598
15.5	1.51589	2.15872	1.50689	2.03885	1.91501	1.5962	1.86793	1.3253	1.44537	1.38732	1.34526	2.39258
16	1.65125	2.3989	1.55556	1.75727	1.93596	1.86987	1.90559	1.20054	1.3913	1.23861	1.3586	2.36335
16.5	1.67937	2.67845	1.64101	1.63704	1.93346	1.88372	1.96239	1.65959	1.36251	1.15647	1.19909	2.28185
17	1.76297	2.78129	1.71432	1.56461	1.9414	1.90995	1.88959	1.38669	1.37358	1.14026	1.1108	2.25861
17.5	1.85524	3.00642	1.65131	1.79622	1.80429	1.9886	1.90622	1.28201	1.4612	1.06449	1.12638	2.37512
18	1.73622	2.88289	1.47703	2.15192	1.72876	2.29024	1.99705	1.61491	1.33615	1.11144	1.08376	2.32507
18.5	1.75902	2.7916	1.65157	2.11037	1.83993	2.62627	2.17594	1.00295	1.20392	1.14455	0.982835	2.28955
19	1.71636	2.78298	1.58314	2.12008	1.84156	2.79076	2.07657	1.00172	1.15573	1.19025	0.840867	2.09868
19.5	1.52877	2.82004	1.57003	2.20825	1.95919	2.57462	1.74309	0.984007	1.24607	1.40222	0.87098	2.0704
20	1.68598	2.66871	1.49174	2.04195	2.3112	2.64127	1.4348	1.05665	1.07237	1.4045	0.867316	2.22207
20.5	1.6113	2.6584	1.36326	1.94308	2.34667	2.54336	1.54697	1.05782	1.2764	1.42481	0.952053	2.30826
21	1.59019	2.57769	1.34023	1.65596	2.48766	2.84757	1.49927	1.0517	1.30663	1.48198	1.00074	2.18744
21.5	1.45972	2.46897	1.35903	1.44975	2.49918	2.65278	1.44508	0.723257	1.233	1.47127	0.990867	2.18673
22	1.38994	2.48831	1.20601	1.57065	2.42864	2.57621	1.50846	0.721116	1.22603	1.46364	1.09123	2.24622
22.5	1.5357	2.49017	1.15262	1.56036	2.20399	2.51544	1.38666	1.06903	1.34828	1.49139	1.1225	2.26636
23	1.53706	2.13604	1.08556	1.40069	1.91157	2.31599	1.69589	1.06878	1.40622	1.32812	1.19596	2.32762
23.5	1.3235	2.04205	1.02289	1.49139	1.36691	2.43434	1.93165	0.390955	1.35098	1.60139	1.21237	2.27238
24	1.39504	1.62269	1.11908	1.75029	1.36956	2.46266	1.76246	0.392852	1.29871	1.74424	1.27912	2.19422
0.5	1.67091	1.48292	1.03982	1.86517	1.31794	2.27435	1.53212	0.397104	1.51421	1.7852	1.50467	2.27033
1	1.79784	1.48597	1.06388	1.86557	1.27815	2.11241	1.24831	0.961893	1.78607	1.88529	1.76261	2.19131
1.5	1.80844	1.45588	1.09794	2.10197	1.28504	2.10885	1.17951	0.959775	1.79764	1.955	1.6675	2.0919
2	1.50549	1.17504	1.39385	2.16563	1.50668	1.99552	1.44199	0.610145	1.68039	1.97148	1.6709	2.09453
2.5	1.49796	1.38457	1.5437	2.24126	1.58062	2.02626	1.37084	0.917236	1.62594	2.05616	1.72548	2.06247
3	1.61818	1.26544	1.60099	2.36059	1.8067	1.91644	1.35814	0.917082	1.68198	1.78811	1.68141	1.98613
3.5	1.69134	1.51291	1.61316	2.26098	1.81238	1.82728	1.38155	0.915505	1.67308	1.67449	1.60075	1.97618
4	1.38606	1.57379	1.52394	2.2424	1.77283	1.67167	1.45157	0.912455	1.4454	1.68774	1.37962	1.98888
4.5	1.36666	1.71084	1.49858	2.24874	1.87669	1.66037	1.45286	0.484129	1.24665	1.67863	1.13369	2.04123
5	1.43622	1.68836	1.4992	1.99165	1.80249	1.66846	1.41334	0.487182	1.26642	1.81601	1.19907	2.03841
5.5	1.63225	1.93907	1.32026	1.96708	1.85966	1.65888	1.43342	1.30526	1.39506	1.79354	1.21356	2.12965
6	1.66603	1.75324	1.24712	1.93035	1.78689	1.8346	1.65053	0.999876	1.32061	1.95059	1.07996	2.14167
6.5	1.64501	2.08248	1.29669	1.89236	1.69943	1.66112	1.58912	1.00308	1.27009	2.05092	1.13322	2.24721
7	1.52274	2.17849	1.28322	1.89494	1.69051	1.74431	1.65674	1.25489	1.23106	2.02769	1.11174	2.31974
7.5	1.48459	2.1465	1.44124	1.91168	1.5587	1.87731	1.73392	1.25477	1.12644	2.05153	1.22553	2.08243
8	1.48068	2.36528	1.44836	1.89956	1.53478	1.84065	2.05579	1.11137	1.05032	1.89814	1.14557	2.10736
8.5	1.42951	2.45844	1.45249	1.89027	1.57741	1.75896	2.11193	1.82443	1.07384	1.6836	1.18314	2.07432
9	1.40723	2.57898	1.55089	1.81077	1.56794	1.81711	1.98475	1.00853	1.13717	1.57001	1.25904	2.02364
9.5	1.53902	2.70021	1.60129	1.9151	1.62229	1.78556	1.80435	1.00976	1.35151	1.42456	1.46809	1.93644
10	1.59844	2.73009	1.52832	1.97761	1.67424	1.94485	1.90241	1.15087	1.66473	1.38083	1.55627	1.97404
10.5	1.87446	2.52755	1.70426	1.93919	1.53995	1.69681	1.76843	0.898533	1.69805	1.36283	1.68202	1.9751
11	2.4252	2.56944	1.71535	1.95781	1.62683	1.60289	1.66329	0.896524	1.8085	1.41376	1.57204	2.07474
11.5	2.46906	2.58034	1.72408	1.94258	1.71184	1.65918	1.62554	0.915824	1.91622	1.50012	1.65971	2.04314
12	2.57131	2.41647	1.72684	2.14242	1.66136	1.83003	1.55175	0.20237	1.97069	1.59665	1.62475	2.08986
12.5	2.98701	2.23642	1.64436	2.25664	1.71927	1.9802	1.58564	0.358092	1.8816	1.81329	1.60242	2.07662
13	2.92029	2.10983	1.65278	2.20921	1.74011	2.12835	1.48908	0.356409	1.74777	1.81179	1.37614	2.04792
13.5	2.86864	1.85922	1.59785	2.25835	1.73974	2.2006	1.45951	0.221904	1.5046	1.8295	1.2531	1.93411
14	2.6152	1.72058	1.47794	2.21116	1.89268	2.1625	1.55041	0.220937	1.53192	1.86842	1.1226	1.84568
14.5	2.22442	1.80883	1.52942	2.17409	2.00185	2.20887	1.48738	0.449133	1.60895	1.78232	1.12313	1.96275
15	2.28941	1.50941	1.66403	2.17225	1.87571	2.24424	1.43689	0.43032	1.67281	1.77909	1.17452	2.0306
15.5	2.31802	1.49514	1.60825	1.92575	1.94777	2.20635	1.33723	0.501129	1.57493	1.76043	1.11153	2.01117
16	1.91803	1.50895	1.55991	1.83219	1.86116	2.10367	1.32776	0.341694	1.54423	1.65964	1.11911	1.87846
16.5	1.88178	1.57455	1.51157	1.89752	2.118	2.09765	1.33063	0.338154	1.43173	1.67267	1.08591	1.90521
17	1.82682	1.56103	1.50582	1.74955	2.43822	2.01836	1.34206	0.336168	1.48512	1.81179	1.08516	1.84038
17.5	1.89138	1.6187	1.4478	1.66599	2.9017	2.32678	1.28891	1.08311	1.31345	1.80074	1.09163	1.8877
18	1.88444	1.46721	1.34886	1.56278	2.94901	2.29657	1.39776	1.9451	1.33604	1.81106	1.2305	1.76106
18.5	1.96325	1.48197	1.12095	1.53753	3.10111	2.21147	1.35484	1.94592	1.15318	1.86461	1.11922	1.73414
19	1.85733	1.46469	1.16328	1.4708	2.94646	2.19012	1.23308	1.87456	1.13502	1.89092	1.13156	1.7412
19.5	1.83511	1.2156	1.11801	1.27835	3.01648	2.18038	1.04759	2.15578	1.06548	1.92963	1.02141	1.8294
20	1.84621	0.944384	1.15093	1.14387	2.79902	2.11583	1.13764	2.16654	1.41688	2.09477	1.19741	1.85511
20.5	1.92613	0.881093	1.07507	1.06614	2.59951	2.12733	1.08697	2.16327	1.29964	1.95351	1.17668	1.86986
21	1.85754	0.921656	1.06174	1.25483	2.2087	2.14755	1.1249	1.41705	1.3797	1.99863	1.22784	1.86182
21.5	1.89358	0.727306	1.06112	1.18709	2.14081	2.13442	0.902599	0.326195	1.21692	1.86716	1.03518	1.91295
22	1.71077	0.876066	1.16868	1.13253	2.15246	2.13669	0.714864	0.348242	1.2908	1.93557	1.09134	1.84408
22.5	1.72421	0.94265	1.1621	1.16766	2.30906	2.12819	0.942245	0.349751	1.36145	1.98752	1.11892	1.79818
23	1.82009	1.11518	1.22718	1.25691	2.30857	2.07214	0.950187	0.262858	1.43101	1.90213	1.21673	2.0521
23.5	1.91318	1.30787	1.20377	1.27133	2.23792	1.99943	1.0019	0.251154	1.1078	1.71561	1.19396	2.08485
24	2.01396	1.48797	1.49044	1.18537	1.89054	2.05477	1.03203	0.248841	1.38581	1.78704	1.40413	2.14494
0.5	2.05759	1.60605	1.57865	1.16474	1.93389	2.01219	0.952958	0.483952	1.55279	1.76755	1.47632	2.17785
1	1.93827	1.94993	1.61674	1.22046	1.91331	1.99467	1.20682	0.642883	1.53759	1.88989	1.53759	2.11436
1.5	1.95654	1.99502	1.5737	1.23123	1.62662	2.11113	1.39349	0.618765	1.53533	1.90668	1.53863	2.13151
2	1.92575	2.08686	1.69236	1.32571	1.6589	2.11162	1.33899	0.720373	1.5567	1.8824	1.59229	2.22889
2.5	1.84529	1.91397	1.73905	1.49148	1.61648	2.3542	1.5255	0.548214	1.54289	1.97106	1.60943	1.99941
3	1.76436	1.92662	1.71142	1.57653	1.72357	2.51229	1.67722	0.878851	1.57016	1.96805	1.57775	2.06859
3.5	1.59216	2.03334	1.82712	1.67176	2.01817	2.45583	1.66306	1.37813	1.32455	1.82227	1.36405	2.12699
4	1.68083	2.23189	1.78634	1.64157	1.84991	2.46125	1.74232	1.14463	1.20544	1.77016	1.2023	2.19831
4.5	1.91703	1.88654	1.7845	1.53553	1.80212	2.50464	1.82666	0.990891	1.28844	1.79756	1.20951	2.3847
5	2.13684	1.7105	1.83806	1.63975	1.92055	2.38929	1.74226	1.39908	1.28982	1.71137	1.3067	2.40749
5.5	2.35766	1.72747	1.82582	1.57227	1.97632	2.4244	1.79018	1.52397	1.23253	1.72356	1.27736	2.32654
6	2.31218	2.11807	1.85348	1.5894	1.98487	2.24773	1.9443	2.07339	1.20056	1.63428	1.1818	2.31524
6.5	2.45716	1.97613	1.90901	1.58256	1.86244	2.40228	1.67995	1.80044	1.25598	1.70159	1.12796	2.31394
7	2.80711	1.89331	1.67599	1.73141	1.86207	2.44919	1.65572	1.47629	1.41499	1.78123	1.24756	2.25592
7.5	2.74298	1.96153	1.60632	1.72063	1.87312	2.49991	1.69274	1.78062	1.36832	1.83432	1.28246	2.28034
8	2.43585	2.4994	1.53475	2.0123	1.96439	2.59912	1.57791	2.09885	1.34935	1.79151	1.21287	2.18623
8.5	2.22085	2.74676	1.49658	1.90885	2.09246	2.37505	1.59034	1.69438	1.51588	1.76985	1.22519	2.20939
9	1.998	2.68543	1.38321	1.92739	2.0205	2.02644	1.56026	2.03371	1.62016	1.80104	1.26371	2.22329
9.5	2.04514	2.66127	1.2674	1.97698	1.97943	1.88255	1.43263	1.59694	1.77652	1.76935	1.35985	2.21435
10	1.83226	2.9036	1.41856	2.01595	1.98257	1.81192	1.50034	1.5429	1.77255	1.6638	1.39879	2.29563
10.5	1.5195	3.07083	1.41804	2.0571	2.0959	1.86587	1.5375	1.52938	1.68581	1.68136	1.38533	2.51291
11	1.4299	2.97734	1.43743	2.07382	2.50885	1.77571	1.47904	1.45611	1.64338	1.71816	1.35922	2.39712
11.5	1.55593	2.78759	1.50154	2.00205	2.46239	1.62173	1.46467	1.13171	1.70603	1.7658	1.42904	2.41634
12	1.53591	2.63099	1.40507	2.00596	2.54478	1.9928	1.55343	1.12812	1.54481	1.82693	1.31467	2.43052
12.5	1.51481	2.75112	1.41063	1.92905	2.61663	2.11526	1.56321	0.561134	1.49514	1.67459	1.28579	2.45795
13	1.53141	2.77168	1.52876	1.89529	2.68667	2.45809	1.61954	0.426614	1.51117	1.70382	1.32561	2.45392
