# Supplementary material for: Magnetic Fluctuations Entrain the Circadian Rhythm of Locomotor Activity in Zebrafish: Can Cryptochrome Be Involved?
Source: Biology (Basel). 2022 Apr 13;11(4):591. doi: 10.3390/biology11040591 (PMC9025847; doi:10.3390/biology11040591)
Supplement: Supplementary file 1 [file biology-11-00591-s001.zip › 2_stage-group4(magnet33,76_smoothed_for_periodogram).xlsx]

## Sheet: Sw_speed
Time	Fish#1	Fish#2	Fish#3	Fish#4	Fish#5	Fish#6	Fish#7	Fish#8	Fish#9	Fish#10	Fish#11	Fish#12
13.5	1.93541	2.69585	1.78411	2.15286	2.15652	1.56421	1.4218	0.617289	2.39076	2.39357	2.1974	2.21319
14	1.94969	2.56758	1.81749	2.21502	2.00791	1.73689	1.23521	0.548422	2.31977	2.54393	2.43066	2.33974
14.5	1.91633	2.39892	1.80614	2.09783	1.59925	1.5797	1.23187	0.521804	2.24782	2.85793	2.40631	2.45267
15	1.85142	2.46361	1.80544	2.21873	1.48392	1.59445	1.41104	0.654166	2.25682	2.68475	2.43112	2.7683
15.5	1.82083	2.57876	1.69116	2.30523	1.50679	1.23041	1.6793	0.595123	2.35885	2.53898	2.45403	2.85704
16	1.7662	2.40379	1.64038	2.29154	1.1421	1.13286	1.78859	0.730333	2.60432	2.28273	2.27486	2.76118
16.5	1.76702	2.2537	1.61657	2.3429	1.04022	1.28491	1.86904	0.991818	2.85533	2.33538	2.37231	2.93322
17	1.75858	2.20986	1.58852	2.39969	1.11292	1.02011	1.84727	1.14691	3.00926	2.19249	2.22211	2.89551
17.5	1.69416	2.36349	1.56157	1.98285	1.25232	0.996441	2.08885	1.44598	3.08323	1.91706	1.98434	2.7308
18	1.63393	2.37524	1.79019	1.94896	1.70985	0.963993	2.12164	1.87905	3.03003	1.84248	1.93143	2.56846
18.5	1.61432	2.32261	2.11463	1.94641	1.89112	0.777822	1.96972	1.90958	2.89487	2.0415	1.99849	2.44946
19	1.58901	2.44386	2.06097	2.02127	2.02869	1.07516	1.85344	2.03564	2.65043	2.12406	2.09146	2.26357
19.5	1.73908	2.52834	2.04104	2.20408	2.45694	1.38379	1.92854	2.02644	2.24281	2.34393	2.09737	2.10044
20	1.71994	2.64245	2.07466	2.0995	2.78003	1.17805	1.96514	1.94003	1.98704	2.34822	1.87304	1.85135
20.5	1.69216	2.80141	2.10975	2.23466	2.69463	1.74437	2.08602	1.65202	1.89494	2.40918	1.66908	1.85883
21	1.54537	2.76946	2.16406	2.54881	2.68389	2.08296	2.05331	1.23305	1.65621	2.50862	1.64469	1.80889
21.5	1.60124	2.73849	1.9523	2.58823	2.65143	2.53081	2.05675	1.20427	1.49759	2.42632	1.50188	1.69479
22	1.62485	2.3998	1.66462	2.48985	2.52153	2.51438	1.99183	1.3882	1.40977	2.30554	1.42375	1.58277
22.5	1.66426	2.26672	1.71085	2.31285	2.41626	2.23316	1.89833	1.59558	1.40977	2.32265	1.33194	1.65819
23	1.61954	2.3963	1.73158	2.02272	2.23634	2.49444	1.92869	1.65311	1.40771	2.05624	1.4481	1.79518
23.5	1.65829	2.51696	1.73524	2.33557	1.87576	2.70259	1.93008	1.71869	1.35759	1.91992	1.57394	1.80256
24	1.62084	2.4462	1.75963	2.19911	1.7985	2.14779	2.1965	1.93625	1.31672	1.92984	1.66355	2.02155
0.5	1.80631	2.42862	1.74003	2.39514	1.65062	1.96148	2.2038	2.22827	1.29854	1.87913	1.66981	2.10438
1	1.84767	2.60399	2.00183	2.54939	1.57033	1.89761	2.24586	2.11856	1.33638	1.92797	1.98906	2.28626
1.5	1.93833	3.18841	1.98872	2.98797	1.66501	2.23272	2.28244	2.26879	1.30409	1.87884	2.17338	2.26969
2	2.0044	3.38886	2.12265	3.56557	1.6977	2.57978	2.72052	2.16287	1.28998	1.58788	2.17798	2.32279
2.5	1.95706	3.57243	2.13274	4.2125	1.58413	2.20627	2.69178	2.0989	1.21532	1.82091	2.18361	2.47947
3	2.02753	3.60719	2.17863	4.48274	1.72243	2.10312	3.00745	2.26296	1.28956	1.61606	2.04241	2.45758
3.5	2.09566	3.65788	2.18079	4.7296	1.97575	2.26202	2.56313	2.11435	1.36325	1.7047	2.20861	2.51302
4	2.1333	3.76828	2.42124	4.56538	2.18757	2.20201	2.66121	1.85111	1.3535	1.54516	2.22154	2.49057
4.5	2.12403	3.77843	2.40795	4.62779	2.18472	2.24918	2.80852	1.83265	1.34498	1.361	2.0248	2.43858
5	2.0363	3.7146	2.65435	4.26565	2.23416	1.87013	2.94653	1.56338	1.42699	1.44173	1.98527	2.49285
5.5	2.06493	3.52781	2.76389	3.93819	2.2266	1.7339	2.79146	1.63035	1.55433	1.61758	2.0884	2.47485
6	2.09947	3.38067	2.8481	3.57202	2.20184	1.45684	2.73764	1.94038	1.91042	1.6281	2.23033	2.19385
6.5	2.02117	3.1796	2.85539	3.14128	2.25088	1.60267	2.57199	1.80219	2.07879	1.91918	2.40639	2.3126
7	2.0342	3.10913	2.8614	2.99491	2.31972	1.67632	2.48861	1.89174	2.20207	1.85537	2.40949	2.09349
7.5	1.92008	2.98899	2.64164	2.73757	2.44309	1.598	2.3597	1.94058	2.40071	2.2857	2.50447	2.26216
8	1.94309	2.92948	2.4109	2.40486	2.48742	1.63588	2.31618	1.94699	2.61264	2.49832	2.55082	2.26712
8.5	1.97512	2.68841	2.17869	2.41214	2.5067	1.74852	2.23096	1.9476	2.59283	2.50169	2.26935	2.30889
9	1.88581	2.58519	1.95775	2.44133	2.55997	1.72192	2.0864	1.66429	2.53484	2.57924	2.2481	2.3005
9.5	1.81457	2.3943	1.91362	2.13577	2.69646	1.86887	2.07586	1.31836	2.38956	2.52457	2.15473	2.42448
10	1.85219	2.33186	1.95691	1.93228	2.67976	1.5933	2.11208	1.0601	2.42232	2.54299	2.02659	2.35225
10.5	1.84188	2.23098	1.9351	1.66555	2.57333	1.45258	2.31195	1.1592	2.44742	2.62996	1.88251	2.41442
11	1.92977	2.11792	1.89815	1.92899	2.35343	1.49687	2.34283	1.06725	2.45438	2.17176	1.86882	2.26361
11.5	1.90646	2.08952	1.8581	1.92139	2.17508	1.21744	2.2945	1.05715	2.32085	2.12085	1.76935	2.33915
12	2.12594	2.04891	1.7783	1.66813	1.97874	1.2531	2.3265	0.81471	2.28409	2.07214	1.8337	2.28415
12.5	2.0938	2.03784	1.7224	1.61782	1.77107	1.23576	2.39208	0.919383	2.24796	1.72636	1.78992	2.22044
13	2.13299	2.09047	1.67409	1.72294	1.67644	1.25068	2.44873	0.738356	2.1191	1.6337	1.75387	2.12691
13.5	2.06608	2.18887	1.56417	1.65507	1.66269	1.40905	2.30488	0.742727	1.95671	1.49797	1.71596	2.04523
14	2.09612	2.11108	1.5053	1.97745	1.70976	1.32941	2.37495	0.796675	1.75588	1.40906	1.44964	1.97076
14.5	2.10649	2.05864	1.51762	1.79842	1.61232	1.1293	2.58423	0.837613	1.64219	1.56911	1.38103	2.02314
15	2.07191	2.01699	1.54498	1.78374	1.77183	1.00661	2.56348	0.835047	1.79832	1.61393	1.4697	2.02788
15.5	1.81509	2.05095	1.59345	2.09484	1.70669	1.23092	2.55542	1.08903	1.94207	1.50835	1.63569	2.16502
16	1.85974	2.13823	1.63992	1.73801	1.84849	1.42981	2.49961	1.66735	2.11942	1.73138	1.68355	1.90085
16.5	1.85777	2.03644	1.64623	1.71795	1.89426	1.35585	2.4569	1.93162	2.21419	1.6323	1.49418	1.63778
17	1.99942	2.11453	1.66956	1.87076	1.65356	1.30151	2.45318	2.36337	2.27517	1.97397	1.51994	1.72363
17.5	1.96055	2.24056	1.73487	1.65615	1.45974	1.78234	2.38562	2.12147	2.32757	2.09011	1.8225	1.79106
18	2.01195	2.26935	1.75021	1.82777	1.61014	2.00493	2.28497	2.23366	2.42038	2.07174	1.82201	1.59147
18.5	2.01202	2.218	1.75944	1.84822	1.50463	2.28602	2.27003	2.25972	2.31546	1.79509	1.78233	1.53609
19	2.02802	2.27647	1.80308	1.49712	1.6969	2.27552	2.13073	2.19365	2.26105	1.87451	1.82643	1.41415
19.5	2.04014	2.2456	1.8666	2.19888	1.64347	2.13509	2.11773	1.49404	2.16576	1.90289	1.72387	1.64333
20	2.15797	2.39231	1.92415	2.18945	1.81867	2.11687	2.17297	1.2349	2.121	2.07091	1.87786	1.77156
20.5	2.11751	2.31283	1.94211	2.32001	2.11931	2.02983	2.17704	0.814811	2.03777	1.65531	1.8725	1.65129
21	2.1387	2.3697	1.96436	2.4616	2.43075	1.65747	2.13966	0.844065	2.0139	1.64826	1.84432	1.60964
21.5	2.09323	2.58694	1.98049	2.44169	2.29146	1.42496	2.12284	0.791516	1.99968	1.62383	1.73207	1.71245
22	2.38995	2.70067	1.97718	2.52252	2.44496	1.46781	2.13263	0.648922	1.91979	1.91243	1.83315	1.61409
22.5	2.41277	2.58641	1.97777	2.61121	2.64454	1.37446	2.30665	0.767411	1.91041	1.88307	1.96291	1.57557
23	2.44336	2.78128	1.9306	2.17031	2.79631	1.19027	2.31083	0.801982	1.87432	1.97762	2.20203	1.66792
23.5	2.31799	2.88615	1.94051	2.00737	2.65149	1.34265	2.24321	0.815791	1.84916	1.97868	2.19786	1.7916
24	2.24306	2.98924	1.96507	2.12008	2.68335	1.61862	2.27266	1.0479	1.81206	2.06782	2.18965	2.02221
0.5	2.267	3.04399	1.95751	2.11569	2.68954	1.5555	2.31856	1.14811	1.84168	1.99258	2.28956	2.02108
1	2.28689	3.02608	2.02795	1.8772	2.81341	1.58939	2.11593	1.03644	1.73718	2.06328	2.42315	2.07492
1.5	2.0289	3.15618	2.08993	1.91448	2.85079	1.40503	2.14436	1.0192	1.68762	2.03688	2.40428	2.0151
2	2.03372	3.37384	2.06691	2.06124	2.7897	1.54866	2.12757	0.831361	1.627	2.10448	2.31967	2.02295
2.5	1.99935	3.29924	2.11153	2.14091	2.73155	1.7045	2.28793	0.797155	1.5616	2.07999	2.21993	1.91107
3	1.99761	3.25768	2.06195	2.37905	2.80498	1.68693	2.31907	0.918675	1.54804	2.56488	2.2826	1.76455
3.5	2.02407	3.43678	2.1188	2.11286	2.76672	1.52009	2.29238	0.864789	1.58486	2.70778	2.38405	1.55855
4	1.96356	3.45531	2.11932	1.98697	2.61648	1.69213	2.3746	0.695005	1.5674	2.56586	2.1479	1.5127
4.5	2.05635	3.51917	1.98687	2.23054	2.60635	1.96676	2.50641	0.691185	1.57362	2.63493	2.11036	1.39651
5	2.10468	3.3957	1.92074	2.22364	2.57739	1.70295	2.44966	0.580683	1.59539	2.68001	2.13186	1.46409
5.5	2.04677	4.11464	1.99588	2.22606	2.43815	1.43141	2.49362	0.793683	1.60401	2.72306	2.14311	1.42198
6	2.03271	4.2061	1.99536	1.87525	2.42117	1.42931	2.48843	0.913401	1.61938	2.69923	2.16934	1.53578
6.5	2.25069	4.152	2.00522	1.84305	2.31813	1.84578	2.59277	1.08117	1.6671	2.38625	2.1482	1.66183
7	2.53057	3.83523	1.96241	2.0947	2.25313	1.9255	2.75653	1.2403	1.71691	2.41746	2.04324	1.62682
7.5	2.60913	3.68706	1.9805	2.23821	2.21582	2.13492	2.72766	1.33633	1.84527	2.80193	2.19509	1.60147
8	2.54936	3.49209	2.0144	2.20801	2.145	2.26314	2.76864	1.42558	1.9503	2.74163	2.22707	1.61678
8.5	2.41184	3.35213	1.94398	2.05987	1.96396	2.57243	2.78488	1.82518	1.99686	2.86283	2.17564	1.79716
9	2.18749	2.23957	1.87483	2.01244	1.91457	2.6467	2.68122	1.90842	2.05708	2.85145	2.09605	1.79281
9.5	2.21575	2.02459	1.83778	2.08119	1.88158	2.73776	2.40184	2.05139	2.2045	2.92958	2.26954	1.7031
10	1.98918	2.01958	1.90767	2.0833	1.90803	2.4993	2.35656	1.89206	2.34576	2.94341	2.3269	1.68989
10.5	1.67367	2.04471	1.88158	1.96514	1.94654	2.62804	2.13251	1.87354	2.34682	2.97974	2.34095	1.6772
11	1.62442	2.07371	1.80851	1.87324	1.98207	2.37953	2.11496	2.035	2.29039	2.81518	2.39602	1.71249
11.5	1.55566	2.03241	1.81383	1.95849	2.10635	2.27238	2.08826	2.30186	2.26483	2.83378	2.34821	1.67278
12	1.62253	2.05058	1.84862	2.12445	2.36793	2.30957	2.11038	2.14401	2.27828	2.78041	2.44416	1.50845
12.5	1.72587	2.17298	1.82827	2.1687	2.55456	2.3765	2.47121	1.90337	2.31431	2.8474	2.4714	1.49638
13	1.67742	2.16312	1.77584	2.49488	2.69809	2.43839	2.73295	1.83434	2.29983	2.89521	2.23202	1.53735
13.5	1.7839	2.34179	1.64377	2.59906	2.65712	2.29863	2.72758	1.84083	2.14877	2.73302	2.32507	1.54953
14	1.68135	2.29416	1.62929	2.65317	2.73576	2.00326	2.85042	1.80785	2.14891	2.74767	2.49195	1.49572
14.5	1.63567	2.22623	1.64123	2.51997	2.79691	1.97432	2.81918	1.61515	2.06901	2.76225	2.59895	1.88893
15	1.54753	2.27314	1.7085	2.42898	2.76378	1.81736	2.8071	1.34223	2.41931	3.00247	3.02373	2.45494
15.5	1.57469	2.35111	1.79807	2.16197	2.55238	1.64741	2.80938	1.12476	2.74325	3.05976	3.00862	2.59583
16	1.65244	2.51609	1.80027	2.11312	2.44696	1.33823	2.38727	1.20646	3.0992	2.9856	2.78162	2.83543
16.5	1.66104	2.59969	1.87094	1.99956	2.37018	0.972887	2.18145	1.2263	3.281	2.77931	2.56273	2.89715
17	1.64852	2.35249	1.92952	1.89531	2.46926	0.990792	2.11454	1.13458	3.46753	2.71331	2.42386	2.95526
17.5	1.72936	2.34028	1.93479	1.72352	2.4325	0.975914	1.86124	0.869635	3.525	2.51449	2.22735	3.11575
18	1.78096	2.45189	1.95453	1.81447	2.35284	0.799809	1.74787	0.950319	3.94711	2.49965	2.01949	2.7805
18.5	1.84792	2.47734	1.94868	1.85607	2.40168	0.782209	1.71506	0.859628	3.75687	2.23664	1.72553	2.31457
19	1.85881	2.43509	1.9625	2.0597	2.45858	0.802805	1.68594	0.911592	3.48819	2.08231	1.7059	2.20848
19.5	1.92011	2.31904	2.00432	2.05755	2.41579	0.924257	1.69518	0.870483	3.31306	2.18327	2.0009	2.06404
20	1.98066	2.31337	2.01378	2.13847	2.30955	0.918061	1.77593	0.846353	3.14356	2.30242	2.32891	1.91284
20.5	1.86369	2.35238	2.07711	2.16495	2.38067	1.15422	1.75931	0.875264	3.08278	2.41261	2.2906	1.88476
21	1.87375	2.4828	2.09678	2.25971	2.3917	1.35523	1.92534	1.06983	3.09981	2.30659	2.25475	1.89298
21.5	1.91954	2.4358	2.17464	2.31867	2.42161	1.77689	2.05264	1.03517	2.91909	2.01301	2.35362	1.88725
22	1.97088	2.41315	2.17765	2.33162	2.48727	1.73078	2.06714	1.16607	2.82454	1.84942	2.322	1.98387
22.5	1.92985	2.41152	2.1619	2.27995	2.58872	1.55068	2.09298	1.441	2.81981	1.87117	2.2575	2.14344
23	2.02411	2.44461	2.18159	2.25474	2.68543	1.59614	2.36229	1.6908	2.56452	1.74449	2.15234	2.16202
23.5	2.00348	2.51385	2.20475	2.3176	2.98985	1.84112	2.6195	1.53349	2.52002	1.62182	2.06186	2.26008
24	2.05596	2.6865	2.11415	2.36397	2.99122	1.65881	2.74471	1.60381	2.47898	1.58388	1.98726	2.257
0.5	2.0553	2.71333	2.07787	2.29692	2.86784	1.67286	2.78085	1.79434	2.35859	1.46731	2.06651	2.23682
1	1.98424	2.7591	2.11073	2.25344	2.97281	1.45967	2.78932	1.83378	2.14993	1.56014	1.87538	2.27373
1.5	1.95059	2.83684	2.21704	2.31384	3.01021	1.64718	2.85966	1.64958	1.9752	1.64923	1.84834	2.14881
2	1.91085	2.94005	2.25875	2.34087	3.01893	1.97208	3.08159	1.38432	1.85394	1.62014	1.84594	1.98534
2.5	1.83791	3.03157	2.25451	2.30832	3.09246	1.80051	3.00817	1.23946	1.83163	1.62932	1.89623	1.88907
3	1.62514	2.88605	2.26853	2.16103	3.12665	1.96332	2.91926	1.15698	1.71018	1.65548	1.93041	1.84981
3.5	1.56286	2.67178	2.3128	2.08345	2.93128	2.07103	2.86016	1.01628	1.54264	1.77706	2.01223	1.77984
4	1.55415	2.65334	2.40357	2.14179	3.06645	2.1163	2.96526	0.834452	1.70947	2.03128	1.82957	1.68385
4.5	1.31822	2.63815	2.40029	2.11648	3.00323	1.98517	3.13287	0.795987	1.80298	2.16326	1.94503	1.61178
5	1.30368	2.54883	2.26401	2.01947	3.08174	1.79016	3.30355	0.792145	1.84439	2.27875	1.83977	1.60715
5.5	1.23448	2.55071	2.22798	2.04556	3.14443	1.78195	3.22571	0.862802	1.84666	2.23508	1.88878	1.55613
6	1.2016	2.61613	2.18451	2.06273	2.99352	2.22796	3.13887	0.606622	1.85731	2.21533	1.78302	1.64797
6.5	1.29659	2.71531	2.14645	1.98003	2.86666	2.12683	2.98552	0.610635	1.87281	2.19119	1.68012	1.65628
7	1.31514	2.76511	2.15908	2.07837	3.04315	1.91008	2.9337	0.740276	1.85765	2.04898	1.51734	1.87481
7.5	1.44275	2.76532	2.26674	2.04203	3.01629	1.84391	2.83079	0.776659	1.63251	2.01216	1.4488	1.95948
8	1.55864	2.6977	2.25772	2.08431	3.07952	2.03314	2.63673	0.654458	1.49117	1.94912	1.24647	2.0142
8.5	1.48685	2.73809	2.36876	1.94666	2.97951	2.28669	2.5791	0.686059	1.69098	1.82002	1.1412	2.18525
9	1.66964	2.63372	2.44001	2.05433	2.66572	2.21767	2.44089	0.855485	1.94588	1.84297	1.0492	2.21824
9.5	1.70702	2.50876	2.49229	2.13213	2.84842	1.88686	2.4579	0.935609	1.99705	1.92182	1.09038	2.28171
10	1.76521	2.43868	2.50331	2.20316	2.89781	1.83941	2.5796	0.927912	2.01018	1.98478	0.899281	2.58262
10.5	1.78725	2.49317	2.4795	2.12362	2.68963	1.90213	2.57255	0.806701	2.03733	1.99284	1.22379	2.5523
11	1.67482	2.27065	2.37108	2.19212	2.71183	1.65306	2.58676	0.817804	2.00173	2.08268	1.35043	2.55571
11.5	1.80949	2.28514	2.27164	2.19006	2.34233	1.65946	2.70634	0.959131	2.01091	2.11186	1.54915	2.56474
12	1.98205	2.37705	2.14377	2.1718	2.20647	1.64389	2.57439	1.15374	1.74177	2.15584	1.72817	2.42111
12.5	1.85814	2.44019	2.1975	2.16309	2.36124	1.37753	2.57777	0.945236	1.47851	2.08142	1.67131	2.39921
13	1.81882	2.35343	2.11978	2.14219	2.36376	1.47404	2.58975	0.91017	1.41164	1.90434	1.55828	2.05876
13.5	1.86946	2.43561	2.05796	2.13827	1.98501	1.22752	2.36512	1.09505	1.35437	1.96376	1.8336	1.80339
14	1.80908	2.35142	2.08368	1.84397	2.23597	1.1956	2.1632	1.14453	1.32813	1.95011	1.67362	1.81762
14.5	1.76686	2.68221	2.01028	1.80584	2.2492	1.59323	2.22684	1.02422	1.38878	1.91909	1.71907	1.82561
15	1.7477	2.70222	2.00883	1.83857	2.59692	1.49711	2.24129	1.0335	1.36414	1.98282	1.74566	1.79489
15.5	1.56782	2.48785	2.05556	2.09003	2.60087	1.44147	2.09846	0.821034	1.3939	2.05538	1.86828	1.70227
16	1.64102	2.48367	1.82541	1.99535	2.54532	1.73526	2.09013	1.00539	1.518	2.08268	1.93556	1.65137
16.5	1.55681	2.5716	1.81986	2.02342	2.45808	1.87035	2.02886	0.929312	1.53242	2.28076	2.04753	1.86985
17	1.59269	2.41465	1.82896	2.05385	2.80886	1.95314	2.10471	0.953345	1.62236	2.2761	2.03215	1.77852
17.5	1.6596	2.44181	1.80867	2.41767	2.77143	2.03257	2.30203	1.20437	1.69266	2.33762	2.02779	1.63905
18	1.45658	2.25486	1.78615	2.46066	2.77619	1.87474	2.34442	1.07704	1.68943	2.31831	1.96493	1.55671
18.5	1.49349	2.22331	1.87122	2.20389	2.68963	1.69852	2.14534	1.14689	1.88824	2.35834	1.90867	1.55654
19	1.46222	2.31233	1.79168	2.10662	2.53185	1.41128	2.26906	1.33197	2.18295	2.42503	1.7417	1.68581
19.5	1.33557	2.35756	1.90807	2.11734	2.55377	1.33	2.36713	1.13173	2.07678	2.51614	1.92663	1.75621
20	1.4952	2.39264	1.96695	2.15022	2.54844	1.11079	2.4138	1.29149	2.09323	2.37772	1.9176	1.89734
20.5	1.4542	2.55576	2.00514	2.20081	2.48472	1.29054	2.48389	1.2404	2.02375	2.30319	1.89798	2.12595
21	1.54864	2.5897	2.00349	2.1192	2.20065	1.12642	2.53624	1.14055	2.0524	2.28869	1.8704	2.18204
21.5	1.84307	2.6162	2.09325	2.03885	2.17966	1.01368	2.36747	1.2127	2.21284	2.31697	2.01919	2.35286
22	1.83757	2.6805	2.03298	2.27989	2.14428	1.18528	2.32231	1.07394	2.09709	2.2305	2.09224	2.47809
22.5	1.97347	2.75937	2.05122	2.31125	2.36838	1.37091	2.30608	0.895108	2.07057	2.08615	2.24386	2.39537
23	2.21676	2.77558	1.97861	2.11533	2.41794	1.39273	2.25816	0.963179	2.27998	2.1011	2.16286	2.44837
23.5	2.07219	2.79136	1.98083	1.97689	2.30085	1.58534	2.2431	0.909362	2.34637	2.14958	1.97322	2.34545
24	2.18903	2.75113	1.96633	1.97928	2.43786	1.43678	2.24871	1.01584	2.55852	2.2151	2.06626	2.19505
0.5	2.00661	2.67746	1.95625	2.08603	2.79847	1.78246	2.1635	1.13148	2.5807	2.15169	2.16495	2.15375
1	1.92387	2.77638	1.87205	2.12685	2.73934	1.80441	2.19877	1.14134	2.65697	2.16717	2.23809	2.04464
1.5	1.68611	2.62407	1.86651	2.14585	2.86327	1.86823	2.29538	1.15774	2.67214	2.18639	2.29325	1.99074
2	1.73515	2.71466	1.87838	1.94197	2.93437	1.95973	2.26972	1.29757	2.37128	1.92027	2.22976	2.01349
2.5	1.63452	2.74334	1.99108	2.15516	2.74106	2.06539	2.28044	1.25787	2.15934	1.88359	2.21535	1.97644
3	1.74976	2.78915	1.95979	2.10704	2.76602	1.87017	2.29791	1.30569	2.28586	1.82105	2.57731	1.80578
3.5	1.57154	2.69719	1.98075	2.11369	2.31448	2.05279	2.30391	1.20175	2.20839	1.85083	2.40781	1.79099
4	1.64231	2.88572	2.04699	2.13296	2.22736	1.82887	2.29891	1.10439	2.11541	1.71652	2.11405	1.77551
4.5	1.70233	2.80943	2.08373	2.13977	2.19699	1.66236	2.37269	1.16515	1.89327	1.6915	2.1173	1.95709
5	1.90786	2.93451	2.07833	2.08246	1.91923	1.85538	2.34871	1.27585	1.83145	1.68014	2.1465	1.91611
5.5	1.92679	2.72932	2.19471	2.3274	1.74022	1.89095	2.379	1.49311	1.9064	1.92749	1.99644	2.04052
6	1.7721	2.65745	2.09571	2.58297	1.80173	1.82634	2.31451	1.41835	1.91766	1.90468	1.86166	2.05631
6.5	1.65718	2.58648	2.12797	2.90311	1.91333	2.13563	2.32362	1.42013	1.67209	1.93419	1.50986	2.27406
7	1.72201	2.54078	2.11072	2.95446	1.85944	1.82613	2.28819	1.28256	1.55186	1.86844	1.68656	2.35915
7.5	1.66794	2.34426	2.03568	2.96098	1.696	1.71471	2.37991	1.30436	1.58764	2.02829	1.85106	2.43907
8	1.69938	2.25931	2.00602	2.94666	1.73423	1.94426	2.35794	1.45468	1.59566	2.03553	1.76034	2.29255
8.5	1.78261	2.20095	1.99684	3.02551	2.02774	1.58398	2.4139	1.55971	1.59718	2.02155	1.81411	2.36461
9	1.76057	2.04358	1.93855	3.03274	2.12534	1.59899	2.42988	1.33864	1.72616	1.97027	2.15694	2.37617
9.5	1.93075	1.98946	1.88378	2.90414	2.24076	1.50066	2.46337	1.67227	1.76103	1.98167	2.06499	2.3957
10	1.79643	2.03065	1.90275	2.80302	2.02899	1.14372	2.53291	1.61671	1.98969	1.99263	2.16095	2.45656
10.5	1.82815	2.15378	1.88855	2.72592	2.199	1.35216	2.52689	1.98995	2.57514	2.42029	2.505	2.87813
11	1.75932	2.17693	1.87197	2.75423	2.25888	1.3758	2.55326	1.94007
11.5	1.61448	2.19816	1.88786	2.81429	1.95754	1.12331	2.65744	1.68674
12	1.47079	2.25414	1.88641	2.8093	1.84691	1.2298	2.74846	1.54105
12.5	1.41583	2.44402	1.82164	2.75326	2.00683	1.15871	2.69524	1.44163
13	1.42451	2.42984	1.90999	2.66133	1.89275	1.15815	2.62429	1.48302
13.5	1.70322	2.35728	1.86679	2.58264	2.05921	1.27923	2.58196	1.4778
